# Supplementary material for: Quality of reporting of randomised controlled trials of artificial intelligence in healthcare: a systematic review
Source: PubMed Central journal article supplement — BMJ Open. 2022 Sep 5;12(9):e061519. doi: 10.1136/bmjopen-2022-061519 (PMC9445816; doi:10.1136/bmjopen-2022-061519), 2022-09-05
Supplement: bmjopen-2022-061519.draft_revisions.pdf [file bmjopen-2022-061519.draft_revisions.pdf]

# BMJ Open

BMJ Open is committed to open peer review. As part of this commitment we make the peer review history of every article we publish publicly available.

When an article is published we post the peer reviewers' comments and the authors' responses online. We also post the versions of the paper that were used during peer review. These are the versions that the peer review comments apply to.

The versions of the paper that follow are the versions that were submitted during the peer review process. They are not the versions of record or the final published versions. They should not be cited or distributed as the published version of this manuscript.

BMJ Open is an open access journal and the full, final, typeset and author-corrected version of record of the manuscript is available on our site with no access controls, subscription charges or pay-per-view fees (<http://bmjopen.bmj.com>).

If you have any questions on BMJ Open's open peer review process please email [info.bmjopen@bmj.com](mailto:info.bmjopen@bmj.com)

# BMJ Open

## Quality of reporting of randomized controlled trials in artificial intelligence: a systematic review

|                               |                                                                                                                                                                                               |
|-------------------------------|-----------------------------------------------------------------------------------------------------------------------------------------------------------------------------------------------|
| Journal:                      | <i>BMJ Open</i>                                                                                                                                                                               |
| Manuscript ID                 | bmjopen-2022-061519                                                                                                                                                                           |
| Article Type:                 | Original research                                                                                                                                                                             |
| Date Submitted by the Author: | 30-Jan-2022                                                                                                                                                                                   |
| Complete List of Authors:     | Shahzad, Rida; Shahzad Eye Hospital<br>Ayub, Bushra; Aga Khan University Hospital<br>Siddiqui, M. A. Rehman; Aga Khan University Hospital, Department of<br>Ophthalmology and Visual Sciences |
| Keywords:                     | STATISTICS & RESEARCH METHODS, Clinical trials < THERAPEUTICS,<br>Health informatics < BIOTECHNOLOGY & BIOINFORMATICS                                                                         |
|                               |                                                                                                                                                                                               |

SCHOLARONE™  
Manuscripts

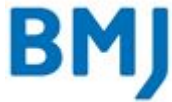

I, the Submitting Author has the right to grant and does grant on behalf of all authors of the Work (as defined in the below author licence), an exclusive licence and/or a non-exclusive licence for contributions from authors who are: i) UK Crown employees; ii) where BMJ has agreed a CC-BY licence shall apply, and/or iii) in accordance with the terms applicable for US Federal Government officers or employees acting as part of their official duties; on a worldwide, perpetual, irrevocable, royalty-free basis to BMJ Publishing Group Ltd ("BMJ") its licensees and where the relevant Journal is co-owned by BMJ to the co-owners of the Journal, to publish the Work in this journal and any other BMJ products and to exploit all rights, as set out in our [licence](#).

The Submitting Author accepts and understands that any supply made under these terms is made by BMJ to the Submitting Author unless you are acting as an employee on behalf of your employer or a postgraduate student of an affiliated institution which is paying any applicable article publishing charge ("APC") for Open Access articles. Where the Submitting Author wishes to make the Work available on an Open Access basis (and intends to pay the relevant APC), the terms of reuse of such Open Access shall be governed by a Creative Commons licence – details of these licences and which [Creative Commons](#) licence will apply to this Work are set out in our licence referred to above.

Other than as permitted in any relevant BMJ Author's Self Archiving Policies, I confirm this Work has not been accepted for publication elsewhere, is not being considered for publication elsewhere and does not duplicate material already published. I confirm all authors consent to publication of this Work and authorise the granting of this licence.

1  
2  
3  
4 **Title: Quality of reporting of randomized controlled trials in artificial intelligence: a**  
5 **systematic review**  
6  
7  
8  
9

10 **Authors:**

11 Rida Shahzad<sup>1</sup>

12 Bushra Ayub<sup>2</sup>

13 M. A. Rehman Siddiqui<sup>1,3,4</sup>  
14  
15  
16  
17  
18  
19  
20  
21

22 **Authors Affiliations:**

- 23  
24 1. Shahzad Eye Hospital, Karachi, Pakistan  
25  
26 2. Aga Khan University Hospital, Karachi, Pakistan  
27  
28 3. Section of Ophthalmology, Department of Surgery, Aga Khan University Hospital,  
29 Karachi, Pakistan  
30  
31  
32 4. The Eye Centre, South City Hospital, Karachi, Pakistan  
33  
34  
35  
36  
37

38 **Corresponding author:**

39 M. A. Rehman Siddiqui

40 Section of Ophthalmology, Department of Surgery,  
41  
42  
43  
44  
45  
46  
47  
48  
49  
50

Aga Khan University Hospital,

National Stadium Road, P.O. Box 3500,

Karachi, Pakistan

51 Email: [rehman.siddiqui@gmail.com](mailto:rehman.siddiqui@gmail.com)  
52  
53  
54  
55

56 **Funding:** None  
57  
58  
59  
60

1  
2  
3 **Keywords:**  
4

5 CONSORT, CONSORT-AI, artificial intelligence, deep learning, machine learning,  
6  
7 randomized controlled trials.  
8  
9  
10  
11  
12  
13  
14  
15  
16  
17  
18  
19  
20  
21  
22  
23  
24  
25  
26  
27  
28  
29  
30  
31  
32  
33  
34  
35  
36  
37  
38  
39  
40  
41  
42  
43  
44  
45  
46  
47  
48  
49  
50  
51  
52  
53  
54  
55  
56  
57  
58  
59  
60

For peer review only

**SYNOPSIS**

Quality of reporting of randomised controlled trials of artificial intelligence in health care is suboptimal.

For peer review only

## ABSTRACT

**Objectives:** The aim of this study was to evaluate quality of reporting of randomised controlled trials (RCTs) of artificial intelligence (AI) in health care from 2015 to 2020 against Consolidated Standards of Reporting Trials – Artificial Intelligence (CONSORT-AI) guidelines.

**Methods:** We searched PubMed and EMBASE databases to identify eligible studies from 2015 to 2020. The included studies were graded using the CONSORT-AI checklist comprising of 43 items by two independent graders. The results were tabulated and descriptive statistics were reported.

**Results:** We screened 939 potential abstracts, of which 73 full-text articles were reviewed for eligibility. A total of 15 studies were included. Number of participants ranged from 28 to 1058. Studies pertained to medical fields including medicine (n = 2), psychiatry (n = 3), gastroenterology (n = 5), cardiology (n = 2), ophthalmology (n = 1), endocrinology (n = 1), and neurology (n = 1). Studies were from countries including China (n = 6), United States (n = 6), United Kingdom (n = 1), Netherlands (n = 1), and Israel (n = 1). Only 3 items of the CONSORT-AI items were fully reported in all studies. Five items were not applicable in more than 85% of the studies. Twenty per cent of the studies did not report more than 50% of the CONSORT-AI checklist items.

**Conclusions:** Quality of reporting of RCTs in AI in suboptimal. There is a high risk of bias in existing RCTs, therefore caution must be taken when generalizing the findings of these RCTs in real-world settings.

## ARTICLE SUMMARY

### Strengths and Limitations of the Study:

- This systematic review is the first study to evaluate quality of reporting of RCTs in AI of all medical fields using the CONSORT-AI guidelines.
- It helps to assess applicability of AI algorithms in real world clinical settings.
- A limitation of this study is the utilization of two databases, covering a span of 5 years only.

## INTRODUCTION

Artificial intelligence (AI) is a field of immense potential in healthcare. With an increase in computational power and portability, AI is finding increased utility in the medical realm, with a special emphasis on deep learning and neural networks. Medical applications of AI range from screening, diagnosis, prognosis, and generation of management plans.<sup>1-5</sup> For example, AI has been extensively studied in ophthalmology for various diseases such as diabetic retinopathy,<sup>6</sup> age-related macular degeneration,<sup>7</sup> and glaucoma.<sup>8</sup> However, increased hype associated with AI - without sound evidence base - and subsequent failure to deliver, may result in disappointment.<sup>9</sup>

Randomized controlled trials (RCTs) are the highest quality of evidence used by clinicians in decision-making regarding interventions.<sup>10</sup> RCTs may be susceptible to various forms of biases. Adequate reporting of RCTs is vital, so that the results and conclusions derived from a study may be assessed critically by the readers.<sup>11,12</sup>



1  
2  
3 The CONSORT (Consolidated Standards of Reporting Trials) statement was introduced in  
4  
5 1996 to establish guidelines to improve the reporting quality of clinical trials. Additionally,  
6  
7 CONSORT statement is a useful guide that helps readers with the critical appraisal of RCTs  
8  
9 to ascertain their reliability and clinical applicability.<sup>13</sup> The most recent update of the  
10  
11 CONSORT statement was published in 2010, listing 25 minimum reporting requirements.<sup>14</sup>  
12  
13 Several extensions to CONSORT also exist, which cater to certain specific study designs.<sup>15-18</sup>  
14  
15  
16  
17  
18

19 RCTs of AI have unique characteristics. Issues have been voiced regarding the design and  
20  
21 reporting of such studies.<sup>19,20</sup> CONSORT-AI was recently published as an extension of the  
22  
23 CONSORT 2010 statement to evaluate RCTs involving AI. Fourteen new items were added  
24  
25 to the checklist – including 11 extensions and 3 elaborations.<sup>21,22</sup>  
26  
27  
28  
29  
30

31 The aim of this study was to evaluate the quality of reporting of RCTs of AI intervention for  
32  
33 medical conditions, published from 2015 to 2020, based on CONSORT-AI guidelines.  
34  
35  
36  
37

## 38 **METHODS**

39  
40  
41  
42

43 We performed a systematic review of RCTs of AI for medical conditions published between  
44  
45 January 2015 and December 2020. We searched PubMed and EMBASE databases for  
46  
47 potential studies. The PubMed search was conducted using the MeSH terms: “artificial  
48  
49 intelligence”, “machine learning”, and “deep learning”. The term “artificial intelligence”,  
50  
51 “deep learning” and machine learning” were searched in EMBASE. In both the databases, the  
52  
53 search was limited to RCTs, publications in the English language, from the year 2015 to  
54  
55 2020, and human subjects (Appendix 1). The records were screened by two independent  
56  
57 investigators for potential inclusion. The abstracts of RCTs using artificial intelligence, deep  
58  
59  
60

1  
2  
3 learning, and machine learning were further evaluated for possible inclusion. Protocols,  
4 studies on robotics, and post-hoc analyses of randomized controlled trials were excluded.  
5  
6  
7  
8  
9

10 Full-text articles of all shortlisted abstracts were then screened for eligibility. Publications  
11 were included if AI was used as an intervention for a medical condition, if there was a  
12 comparator control group in the study and there was evidence of randomization. In case of a  
13 disagreement, a senior reviewer assessed the full text and the disagreement was resolved with  
14 consensus. The exclusion criteria were non-randomized studies, secondary studies, post-hoc  
15 analyses, or if the intervention investigated was not AI. Additionally, if the target condition  
16 was not a medical disease or if the research pertained to medical education, the study was  
17 excluded.  
18  
19  
20  
21  
22  
23  
24  
25  
26  
27  
28  
29

30 The CONSORT-AI checklist of 43 items (Supplementary table 1) was used to grade the  
31 included studies. Each item was scored fully-, partially- or not- reported. If an item was  
32 irrelevant to a particular study, it was labeled as “not applicable”. Each publication was  
33 scored by two trained graders independently. Differences were discussed with the senior  
34 reviewer to reach a consensus.  
35  
36  
37  
38  
39  
40  
41  
42  
43

44 The results were tabulated by writing all the reported items as the numerator and the total  
45 number of applicable items as the denominator. The descriptive statistics for the study  
46 population and clinical characteristics are reported. The protocol of this study was submitted  
47 to PROSPERO in February 2021.  
48  
49  
50  
51  
52  
53  
54  
55  
56  
57  
58  
59  
60

## RESULTS

### Study selection

The initial search identified 939 potential records. Seventy-three articles were considered as potentially eligible after screening of abstracts. Following a review of full-text manuscripts, a total of 15 manuscripts were included in the systematic review (Figure 1).

### General characteristics

The included studies (Supplementary table 2) were from the years 2016 to 2020. The number of participants ranged from 28 to 1058. They pertained to various medical fields, including medicine (n = 2), psychiatry (n = 3), gastroenterology (n = 5), cardiology (n = 2), ophthalmology (n = 1), endocrinology (n = 1), and neurology (n = 1). Studies were from different parts of the world, including China (n = 6), United States (n = 6), United Kingdom (n = 1), Netherlands (n = 1), and Israel (n = 1). There were no multicenter trials.

### Adherence to reporting standards

The median number of fully reported CONSORT-AI checklist items in the included studies was 26 (range 7-36) of a possible total of 43. Overall, only 3 (items # 1b, 4b, and 21) out of possible 43 items were fully reported in all 15 studies. Five items (items #3b, 6b, 7b, 14b, and 17b) were deemed not applicable in more than 85% of the included studies. The two least reported items were item #5iii (not reported in 14/15 studies) and item #24 (not reported in 12/15 studies). Twenty per cent (3/15) of included studies did not report more than 50% of the CONSORT-AI checklist items. The reporting of each item is given in Table 1.

Table 1: Summary of CONSORT-AI Items:

|                           | Item   | Fully Reported | Partially Reported | Not Reported | Not Applicable | Applicable Items Total Score | Applicable Items Total (%) |
|---------------------------|--------|----------------|--------------------|--------------|----------------|------------------------------|----------------------------|
| Title and Abstract        | 1a,    | 14             | 1                  | 0            | 0              | 15                           | 100                        |
|                           | 1a(i)  |                |                    |              |                |                              |                            |
|                           | 1b,    | 15             | 0                  | 0            | 0              | 15                           | 100                        |
|                           | 1b(ii) |                |                    |              |                |                              |                            |
| <b>Introduction</b>       |        |                |                    |              |                |                              |                            |
| Background and objectives | 2a,    | 14             | 1                  | 0            | 0              | 15                           | 100                        |
|                           | 2a(i)  |                |                    |              |                |                              |                            |
|                           | 2b     | 13             | 0                  | 2            | 0              | 13                           | 87                         |
| <b>Methods</b>            |        |                |                    |              |                |                              |                            |
| Trial Design              | 3a     | 9              | 2                  | 4            | 0              | 11                           | 73                         |
|                           | 3b     | 2              | 0                  | 0            | 13             | 2                            | 100                        |
| Participants              | 4ai    | 13             | 0                  | 2            | 0              | 13                           | 87                         |
|                           | 4a(ii) | 4              | 0                  | 11           | 0              | 4                            | 27                         |
|                           | 4b     | 15             | 0                  | 0            | 0              | 15                           | 100                        |
| Intervention              | 5i     | 4              | 0                  | 11           | 0              | 4                            | 27                         |
|                           | 5ii    | 10             | 0                  | 5            | 0              | 10                           | 67                         |
|                           | 5iii   | 1              | 0                  | 14           | 0              | 1                            | 7                          |
|                           | 5iv    | 14             | 0                  | 1            | 0              | 14                           | 93                         |
|                           | 5v     | 14             | 0                  | 1            | 0              | 14                           | 93                         |
|                           | 5vi    | 11             | 0                  | 4            | 0              | 11                           | 73                         |
| Outcomes                  | 6a     | 13             | 0                  | 2            | 0              | 13                           | 87                         |
|                           | 6b     | 0              | 0                  | 0            | 15             | 0                            | 0                          |
| Sample size               | 7a     | 10             | 0                  | 5            | 0              | 10                           | 67                         |
|                           | 7b     | 1              | 0                  | 0            | 14             | 1                            | 100                        |

|                                  |     |    |   |    |    |    |     |
|----------------------------------|-----|----|---|----|----|----|-----|
| Sequence generation              | 8a  | 12 | 0 | 3  | 0  | 12 | 80  |
|                                  | 8b  | 9  | 0 | 6  | 0  | 9  | 60  |
| <b>Randomisation</b>             |     |    |   |    |    |    |     |
| Allocation concealment mechanism | 9   | 6  | 0 | 9  | 0  | 6  | 40  |
| Implementation                   | 10  | 7  | 3 | 5  | 0  | 10 | 67  |
| Blinding                         | 11a | 9  | 0 | 6  | 0  | 9  | 60  |
|                                  | 11b | 7  | 0 | 6  | 2  | 7  | 47  |
| Statistical methods              | 12a | 13 | 0 | 2  | 0  | 13 | 87  |
|                                  | 12b | 11 | 0 | 4  | 0  | 11 | 73  |
| <b>Results</b>                   |     |    |   |    |    |    |     |
| Participant flow                 | 13a | 12 | 2 | 1  | 0  | 14 | 93  |
|                                  | 13b | 11 | 1 | 3  | 0  | 12 | 80  |
| Recruitment                      | 14a | 13 | 0 | 2  | 0  | 13 | 87  |
|                                  | 14b | 0  | 0 | 0  | 15 | 0  | 0   |
| Baseline data                    | 15  | 13 | 0 | 2  | 0  | 13 | 87  |
| Numbers analyzed                 | 16  | 11 | 1 | 3  | 0  | 12 | 80  |
| Outcomes and estimation          | 17a | 9  | 3 | 3  | 0  | 12 | 80  |
|                                  | 17b | 1  | 0 | 0  | 14 | 1  | 7   |
| Ancillary analyses               | 18  | 10 | 0 | 5  | 0  | 10 | 67  |
| Harms                            | 19  | 0  | 5 | 10 | 0  | 5  | 33  |
| <b>Discussion</b>                |     |    |   |    |    |    |     |
| Limitations                      | 20  | 13 | 0 | 2  | 0  | 13 | 87  |
| Generalizability                 | 21  | 15 | 0 | 0  | 0  | 15 | 100 |
| Interpretation                   | 22  | 14 | 0 | 1  | 0  | 14 | 93  |

|                          |    |    |   |    |   |    |    |
|--------------------------|----|----|---|----|---|----|----|
| <b>Other information</b> |    |    |   |    |   |    |    |
| Registration             | 23 | 14 | 0 | 1  | 0 | 14 | 93 |
| Protocol                 | 24 | 3  | 0 | 12 | 0 | 3  | 20 |
| Funding                  | 25 | 4  | 7 | 4  | 0 | 11 | 73 |

The most frequently reported items were: intended use of the AI intervention within the trial in the title and/or abstract [item# 1b], settings and locations where the data were collected [item# 4b], and generalizability of the findings [item# 21].

### **Patient and Public Involvement**

No patient or public was involved in this study.

### **Ethics approval statement**

This study is a systematic review which did not involve human subjects. Therefore, no ethics approval was required.

### **DISCUSSION**

In our Review, the quality of reporting of RCTs varied widely. For example, the item regarding title and abstract (item #1a), authors of all studies successfully identified them as RCTs of AI. Similarly, all studies fully reported the intended use of the AI intervention within the trial (item#1b). The importance of clearly reporting these items is for easy identification of trials during literature search and future systematic review. A recent review suggested that good scientific manuscript titles which convey the main role of their respective studies is positively related to their clarity and impact.<sup>23</sup>

1  
2  
3  
4  
5  
6 Likewise, items regarding the introduction of the article and description of AI intervention in  
7 the clinical pathway had a 100% reporting score, with 93% being fully and 7% being partially  
8 reported (item#2a). However, two out of fifteen studies failed to report their specific  
9 objectives or hypothesis (item #2b). Adequate reporting of these factors reflects clarity on the  
10 role of AI in their respective fields. A well-formulated introduction would inform the reader  
11 of relevant background knowledge regarding the goal of the intervention, in addition to  
12 giving them essential knowledge on how it was applied and what results it was expected to  
13 yield.<sup>24</sup> It is important to note, however, that these items can be easily reported within the  
14 manuscript by performing a good background literature review. The main purpose of  
15 ensuring appropriate reporting of these items is to ensure that the intended use and context of  
16 the AI intervention within the study is well understood by the reader.  
17  
18  
19  
20  
21  
22  
23  
24  
25  
26  
27  
28  
29  
30  
31  
32

33 When looking at the adherence to reporting standards in the methods section, a large range  
34 was observed, with 0%-100% of studies fully reporting each applicable item. Informing the  
35 readers regarding the AI intervention in question is essential to aid in understanding its role  
36 and in recognizing some of the difficulties faced with its implementation. A large number of  
37 studies were suboptimal in reporting certain items related to the AI intervention itself. Eleven  
38 out of fifteen studies did not mention the version of the AI algorithm used (item#5i). This  
39 could potentially confuse the reader regarding which version to apply the findings of the  
40 study to because an AI algorithm is likely to undergo multiple updates.<sup>21</sup>  
41  
42  
43  
44  
45  
46  
47  
48  
49  
50  
51  
52  
53

54 Especially poor reporting standards were observed for items related to input data. Information  
55 about the input data helps readers understand the kind of data provided to train the algorithm  
56 to yield a given output. The overall performance of any given AI intervention is reliant on the  
57  
58  
59  
60

1  
2  
3 quality of input data.<sup>25</sup> However, only 4/15 studies identified the inclusion and exclusion  
4  
5 criteria at the level of the input data. 33% of the studies did not report how the input data was  
6  
7 acquired for the intervention. Moreover, a mere 7% of studies reported how poor quality or  
8  
9 unavailable input data was handled and assessed (item#5iii). Such details are important,  
10  
11 because they allow an evaluator to distinguish the AI platforms that are only work in ideal  
12  
13 conditions from those which can be applied to real-world settings.<sup>26</sup>  
14  
15  
16  
17  
18

19 Some items regarding the AI intervention [items 5iv, 5v] were reported adequately in most  
20  
21 studies. Fourteen out of 15 studies successfully reported both the output of the AI  
22  
23 intervention, along with indicating human-AI interaction and the level of expertise required  
24  
25 by users. Clarity on the human-AI interface is essential to ensure a standard approach, as well  
26  
27 as to avoid ethical implications, such as being functionally safe.<sup>27,28</sup> For example, it is  
28  
29 essential that qualified experts can interpret dynamically complex variables exhibited by AI  
30  
31 interfaces which are related to patients as well as the clinical context – only then it is possible  
32  
33 that they enable an improvement in clinicians' decision-making process.<sup>29</sup> Finally, the type of  
34  
35 outputs generated by an AI intervention directly impacts its clinical usability and any  
36  
37 subsequent incidents encountered in the process.  
38  
39  
40  
41  
42  
43  
44

45 Transparency in reporting the methods of a trial is also vital to inform the reader of potential  
46  
47 biases in a study and evaluate the applicability of a particular intervention. Missing  
48  
49 information may potentially result in readers making incorrect inferences from the findings of  
50  
51 a study. While most authors successfully reported items like the location of data collection  
52  
53 (100% of the studies), a large percentage of studies missed reporting vital components of the  
54  
55 methodology. An essential component of RCTs is the process of randomization itself, to  
56  
57 avoid selection bias.<sup>30</sup> However, 40% of the studies did not report the type of randomization  
58  
59  
60



1  
2  
3 performed (item#8b), and 60% did not report the mechanism employed for random allocation  
4 concealment(item#9). Additionally, 40% of the studies did not report information regarding  
5 blinding following intervention assignment to study and control groups(item#11a). Only 47%  
6 of the studies stated similarities between the interventions assigned to the study and control  
7 groups(item#11b), which is important to educate the reader of how the AI intervention differs  
8 from standard management protocol. A systematic review of glioma treatment revealed that  
9 CONSORT items regarding randomization and blinding were reported in less than 25% of  
10 the studies, suggesting that these items lack optimal reporting.<sup>31</sup> Incomplete reporting of these  
11 items leave large gaps in reporting of RCTs, and results in a lack of information needed to  
12 critically appraise the trial itself.  
13  
14  
15  
16  
17  
18  
19  
20  
21  
22  
23  
24  
25  
26  
27

28 Presentation and reporting of results (items# 13-19) were made adequately in most of the  
29 studies, including participant flow, baseline data, as well as primary and secondary outcomes.  
30 However, only 5 out of 15 studies reported the presence or absence of important harms and  
31 unintended effects in each group (item# 19). This is an important item to report for the  
32 readers to assess potential risks of the intervention. Moreover, ten studies did not describe the  
33 results of any analysis of performance errors and how errors were identified. This is an  
34 important item to discuss especially as AI platforms can make errors that may be difficult to  
35 predict but may have disastrous effects if employed on a large scale.<sup>32</sup> It is therefore  
36 important to report cases of error and outline risk mitigation strategies to conclude which  
37 settings and populations the AI intervention can be safely executed in.<sup>21</sup>  
38  
39  
40  
41  
42  
43  
44  
45  
46  
47  
48  
49  
50  
51  
52  
53

54 All studies sufficiently reported the CONSORT-AI items about the discussion section (items#  
55 20-22) Interestingly, 15/15 of the studies were quick to offer promising generalizability of  
56 their findings in the clinical setting. Generalizability of AI systems can be limited, especially  
57  
58  
59  
60

1  
2  
3 when used in the real-world setting outside of the environment they were developed in.<sup>32,33</sup>

4  
5 Therefore it is imperative that the generalizability of such studies be evaluated with caution.

6  
7  
8 Two studies failed to list their limitations (item#20).

9  
10  
11  
12 Observations regarding the applicability of the CONSORT-AI checklist itself were also  
13  
14 made. Five of the items of the checklist were not applicable in more than 85% of the included  
15  
16 studies. These included items referring to changes made to methods and outcomes after trial  
17  
18 commencement, explanation of any interim analyses and stopping guidelines, why the trial  
19  
20 was ended, and presentation of binary outcomes. As can be seen, most of these items pertain  
21  
22 to changes made in the trial, which is not the case in most trials. Caution should be employed  
23  
24 when scoring the study using CONSORT-AI with regards to these items, as they would result  
25  
26 in the underestimation of the overall score of any particular study. A consideration that can be  
27  
28 made in the future is to update these items in order to make them more applicable to RCTs in  
29  
30 AI.  
31  
32  
33  
34  
35  
36  
37

38 Another observation was that AI extensions of a few items were unrelated to the CONSORT  
39  
40 item itself. For example, the item regarding harms was extended with the inquiry regarding  
41  
42 the results of analysis of performance errors. Similarly, the item about funding of the study  
43  
44 had the AI extension of accessibility of the AI intervention and/or its code, again making the  
45  
46 two unrelated and irrelevant to each other. Full reporting of one of these two components  
47  
48 would render the entire item as partially reported, as was seen in 7/15 of the studies in our  
49  
50 review. A future update to the guidelines could consider making these items independent to  
51  
52 each other, or by explicitly outlining their relevance to one another.  
53  
54  
55  
56  
57  
58  
59  
60

1  
2  
3 Certain general observations were also made regarding the included RCTs in our review. The  
4 sample size in the studies ranged from 28 to 1058. Sample size calculations were reported in  
5 only 10/15 of the studies. This wide range suggests that a standard approach to sample size  
6 calculation is not practiced in RCTs of AI. Diagnostic accuracy of human professionals is  
7 often set higher than that of AI while employing sample size estimation, which means that AI  
8 is inferior to human controls.<sup>34</sup> It is recommended that sample size calculations are performed  
9 using a non-inferior design by setting a more suitable non-inferiority margin, of diagnostic  
10 accuracy, of for example 5%.<sup>35</sup> Similarly, the majority of the studies took place in China, and  
11 were focused on gastroenterology, making them less representative of other fields and  
12 perhaps other parts of the world.  
13  
14  
15  
16  
17  
18  
19  
20  
21  
22  
23  
24  
25  
26  
27

28 There are some limitations of our review. Potential eligible studies could have been missed in  
29 the inclusion process, as only two databases were searched. Furthermore, this review is a  
30 screenshot in time; additional AI RCTs could have been performed following our search final  
31 search date which are not included.  
32  
33  
34  
35  
36  
37  
38  
39

40 In conclusion, the standard of reporting in AI RCTs was suboptimal. We found that many  
41 trials were at high risk of bias, and data information was insufficient in most studies.  
42 Therefore, caution must be employed while generalizing the findings and applicability of  
43 such studies in the real world. Some factors related to poor reporting were related to the  
44 CONSORT-AI checklist itself. Improvement of reporting standards may be achieved in the  
45 future by addressing these variables.  
46  
47  
48  
49  
50  
51  
52  
53  
54  
55  
56  
57  
58  
59  
60

## Contributors

The idea for the study was conceived and planned by MARS. RS and BA carried out the literature review process including screening of abstracts and review of full text articles, while MARS acted as senior reviewer. RS and BA independently scored the included studies using the CONSORT-AI checklist and disagreements were resolved following a combined discussion with MARS. The manuscript was prepared by RS and BA and edited by MARS.

All authors reviewed and approved the final manuscript.

## Competing interests

None declared

## Funding

None

## Data sharing statement

All data are freely available.

## REFERENCES:

1. McKinney SM, Sieniek M, Godbole V, Godwin J, Antropova N, Ashrafian H, et al. International evaluation of an AI system for breast cancer screening. *Nature* 2020;577(7788):89-94.

- 1  
2  
3 2. Esteva A, Kuprel B, Novoa RA, Ko J, Swetter SM, Blau HM, et al.  
4  
5 Dermatologist-level classification of skin cancer with deep neural networks.  
6  
7 *Nature* 2017;542(7639):115-8.  
8  
9
- 10 3. Rajpurkar P, Irvin J, Ball RL, Zhu K, Yang B, Mehta H, et al. Deep learning for  
11  
12 chest radiograph diagnosis: A retrospective comparison of the CheXNeXt  
13  
14 algorithm to practicing radiologists. *PLoS medicine* 2018;15(11):e1002686.  
15  
16
- 17 4. Tyler NS, Mosquera-Lopez CM, Wilson LM, Dodier RH, Branigan DL, Gabo  
18  
19 VB, et al. An artificial intelligence decision support system for the management of  
20  
21 type 1 diabetes. *Nat Metab* 2020;2(7):612-9.  
22  
23
- 24 5. Kim H, Goo JM, Lee KH, Kim YT, Park CM. Preoperative CT-based deep  
25  
26 learning model for predicting disease-free survival in patients with lung  
27  
28 adenocarcinomas. *Radiol* 2020;296(1):216-24.  
29  
30
- 31 6. Wong TY, Bressler NM. Artificial intelligence with deep learning technology  
32  
33 looks into diabetic retinopathy screening. *JAMA* 2016 Dec 13;316(22):2366-7.  
34  
35
- 36 7. von der Emde L, Pfau M, Dysli C, Thiele S, Möller PT, Lindner M, Schmid M,  
37  
38 Fleckenstein M, Holz FG, Schmitz-Valckenberg S. Artificial intelligence for  
39  
40 morphology-based function prediction in neovascular age-related macular  
41  
42 degeneration. *Sci Rep* 2019 Jul 31;9(1):1-2.  
43  
44
- 45 8. Devalla SK, Liang Z, Pham TH, Boote C, Strouthidis NG, Thiery AH, Girard MJ.  
46  
47 Glaucoma management in the era of artificial intelligence. *Br J Ophthalmol* 2020  
48  
49 Mar 1;104(3):301-11.  
50  
51
- 52 9. Navarro CL, Damen JA, Takada T, Nijman SW, Dhiman P, Ma J, Collins GS,  
53  
54 Bajpai R, Riley RD, Moons KG, Hooft L. Risk of bias in studies on prediction  
55  
56 models developed using supervised machine learning techniques: systematic  
57  
58 review. *Br Med J* 2021 Oct 20;375.  
59  
60

10. Altman DG. Better reporting of randomised controlled trials: the CONSORT statement. *British Medical Journal Publishing Group*; 1996.
11. Jüni P, Altman DG, Egger M. Assessing the quality of controlled clinical trials. *Br Med J* 2001;323(7303):42-6.
12. Schulz KF, Chalmers I, Hayes RJ, Altman DG. Empirical evidence of bias: dimensions of methodological quality associated with estimates of treatment effects in controlled trials. *JAMA* 1995;273(5):408-12.
13. Begg C, Cho M, Eastwood S, Horton R, Moher D, Olkin I, et al. Improving the quality of reporting of randomized controlled trials: the CONSORT statement. *JAMA* 1996;276(8):637-9.
14. Schulz KF, Altman DG, Moher D. CONSORT 2010 statement: updated guidelines for reporting parallel group randomised trials. *Trials* 2010;11(1):1-8.
15. Boutron I, Altman DG, Moher D, Schulz KF, Ravaud P. CONSORT statement for randomized trials of nonpharmacologic treatments: a 2017 update and a CONSORT extension for nonpharmacologic trial abstracts. *Ann Int Med* 2017;167(1):40-7.
16. Hopewell S, Clarke M, Moher D, Wager E, Middleton P, Altman DG, et al. CONSORT for reporting randomised trials in journal and conference abstracts. *The Lancet* 2008;371(9609):281-3.
17. Gagnier JJ, Boon H, Rochon P, Moher D, Barnes J, Bombardier C. Reporting randomized, controlled trials of herbal interventions: an elaborated CONSORT statement. *Ann Int Med* 2006;144(5):364-7.
18. Calvert M, Blazeby J, Altman DG, Revicki DA, Moher D, Brundage MD, et al. Reporting of patient-reported outcomes in randomized trials: the CONSORT PRO extension. *JAMA* 2013;309(8):814-22.

- 1  
2  
3 19. Gregory J, Welliver S, Chong J. Top 10 reviewer critiques of radiology artificial  
4 intelligence (AI) articles: qualitative thematic analysis of reviewer critiques of  
5 machine learning/deep learning manuscripts submitted to JMRI. *J Magn Reson*  
6 *Imaging* 2020;52(1):248-54.  
7  
8  
9
- 10  
11  
12 20. Nagendran M, Chen Y, Lovejoy CA, Gordon AC, Komorowski M, Harvey H, et  
13 al. Artificial intelligence versus clinicians: systematic review of design, reporting  
14 standards, and claims of deep learning studies. *Br Med J* 2020;368.  
15  
16  
17
- 18  
19 21. Liu X, Rivera SC, Faes L, Di Ruffano LF, Yau C, Keane PA, et al. Reporting  
20 guidelines for clinical trials evaluating artificial intelligence interventions are  
21 needed. *Nat Med* 2019;25:1467-8.  
22  
23  
24
- 25  
26 22. Liu X, Faes L, Calvert MJ, Denniston AK. Extension of the CONSORT and  
27 SPIRIT statements. *The Lancet* 2019;394(10205):1225.  
28  
29  
30
- 31  
32 23. Rossi MJ, Brand JC. Journal Article Titles Impact Their Citation Rates.  
33 *Arthroscopy* 2020;36(7):2025-9. 1.  
34  
35  
36
- 37  
38 24. Armağan A. How to write an introduction section of a scientific article? *Turk J*  
39 *Urol* 2013;39(Suppl 1):8-9.  
40  
41  
42
- 43  
44 25. Sabottke CF, Spieler BM. The effect of image resolution on deep learning in  
45 radiography. *Radiol Artif Intell* 2020 Jan 22;2(1):e190015.  
46  
47  
48
- 49  
50 26. Ibrahim H, Liu X, Rivera SC, Moher D, Chan AW, Sydes MR, Calvert MJ,  
51 Denniston AK. Reporting guidelines for clinical trials of artificial intelligence  
52 interventions: the SPIRIT-AI and CONSORT-AI guidelines. *Trials* 2021  
53 Dec;22(1):1-5.  
54  
55  
56
- 57  
58 27. Wiens J, Saria S, Sendak M, Ghassemi M, Liu VX, Doshi-Velez F, Jung K, Heller  
59 K, Kale D, Saeed M, Ossorio PN. Do no harm: a roadmap for responsible machine  
60 learning for health care. *Nat Me* 2019 Sep;25(9):1337-40.

- 1  
2  
3  
4  
5  
6  
7  
8  
9  
10  
11  
12  
13  
14  
15  
16  
17  
18  
19  
20  
21  
22  
23  
24  
25  
26  
27  
28  
29  
30  
31  
32  
33  
34  
35  
36  
37  
38  
39  
40  
41  
42  
43  
44  
45  
46  
47  
48  
49  
50  
51  
52  
53  
54  
55  
56  
57  
58  
59  
60
28. Habli I, Lawton T, Porter Z. Artificial intelligence in health care: accountability and safety. *Bull World Health Organ* 2020 Apr 1;98(4):251.
  29. Shortliffe EH, Sepúlveda MJ. Clinical decision support in the era of artificial intelligence. *JAMA* 2018 Dec 4;320(21):2199-200.
  30. Lim CY, In J. Randomization in clinical studies. *Korean J Anesthesiol* 2019 Jun;72(3):221.
  31. Tardy MP, Gal J, Chamorey E, Almairac F, Vandebos F, Bondiau PY, Saada-Bouzzid E. Quality of Randomized Controlled Trials Reporting in the Treatment of Adult Patients with High-Grade Gliomas. *Oncologist* 2018 Mar;23(3):337.
  32. Kelly CJ, Karthikesalingam A, Suleyman M, Corrado G, King D. Key challenges for delivering clinical impact with artificial intelligence. *BMC Med* 2019 Dec;17(1):1-9.
  33. Pooch EH, Ballester P, Barros RC. Can We Trust Deep Learning Based Diagnosis? The Impact of Domain Shift in Chest Radiograph Classification. In International Workshop on Thoracic Image Analysis 2020 Oct 8 (pp. 74-83). Springer, Cham.
  34. Lin H, Li R, Liu Z, Chen J, Yang Y, Chen H, et al. Diagnostic efficacy and therapeutic decision-making capacity of an artificial intelligence platform for childhood cataracts in eye clinics: a multicentre randomized controlled trial. *EClinicalMedicine* 2019; 9: 52–9.
  35. Zhou Q, Cao YH, Chen ZH. Optimizing the study design of clinical trials to identify the efficacy of artificial intelligence tools in clinical practices. *EClinicalMedicine* 2019 Nov 1;16:10-1.



1  
2  
3  
4  
5  
6  
7  
8  
9  
10  
11  
12  
13  
14  
15  
16  
17  
18  
19  
20  
21  
22  
23  
24  
25  
26  
27  
28  
29  
30  
31  
32  
33  
34  
35  
36  
37  
38  
39  
40  
41  
42  
43  
44  
45  
46  
47  
48  
49  
50  
51  
52  
53  
54  
55  
56  
57  
58  
59  
60

For peer review only

1  
2  
3  
4  
5  
6  
7  
8  
9  
10  
11  
12  
13  
14  
15  
16  
17  
18  
19  
20  
21  
22  
23  
24  
25  
26  
27  
28  
29  
30  
31  
32  
33  
34  
35  
36  
37  
38  
39  
40  
41  
42  
43  
44  
45  
46  
47  
48  
49  
50  
51  
52  
53  
54  
55  
56  
57  
58  
59  
60

For peer review only

1  
2  
3  
4  
5  
6  
7  
8  
9  
10  
11  
12  
13  
14  
15  
16  
17  
18  
19  
20  
21  
22  
23  
24  
25  
26  
27  
28  
29  
30  
31  
32  
33  
34  
35  
36  
37  
38  
39  
40  
41  
42  
43  
44  
45  
46  
47  
48  
49  
50  
51  
52  
53  
54  
55  
56  
57  
58  
59  
60

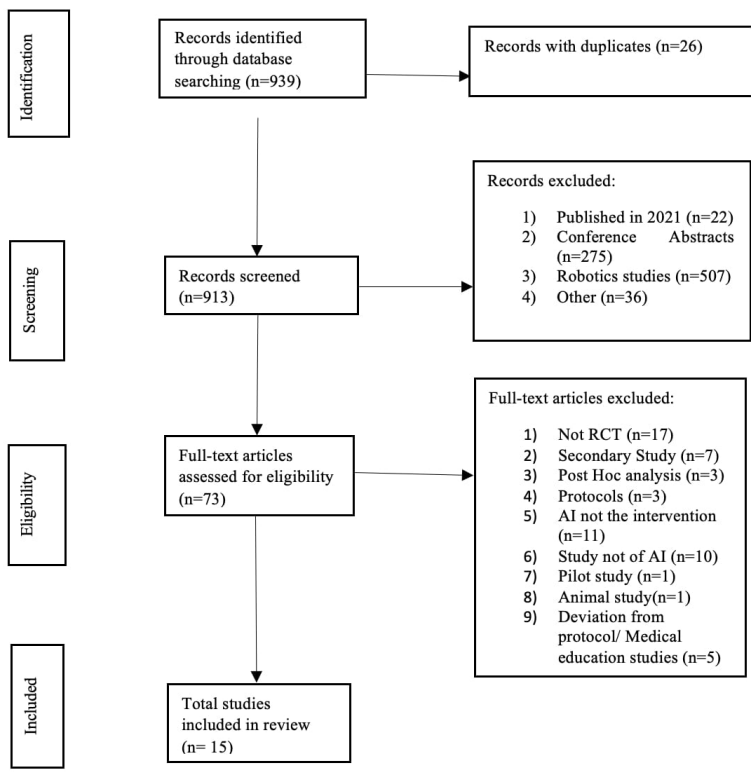

Figure 1: PRISMA flow chart

503x442mm (72 x 72 DPI)

Supplementary table 1: CONSORT-AI checklist\*\*

| Section                   | Item | CONSORT 2010 item                                                                                                       | CONSORT-AI item               | Addressed on page no.*                                                                                                                                |
|---------------------------|------|-------------------------------------------------------------------------------------------------------------------------|-------------------------------|-------------------------------------------------------------------------------------------------------------------------------------------------------|
| <b>Title and abstract</b> |      |                                                                                                                         |                               |                                                                                                                                                       |
| Title and abstract        | 1a   | Identification as a randomized trial in the title                                                                       | CONSORT-AI a,b<br>Elaboration | (i) Indicate that the intervention involves artificial intelligence/machine learning in the title and/or abstract and specify the type of model.      |
|                           | 1b   | Structured summary of trial design, methods, results, and conclusions (for specific guidance see CONSORT for abstracts) |                               | (ii) State the intended use of the AI intervention within the trial in the title and/or abstract.                                                     |
| <b>Introduction</b>       |      |                                                                                                                         |                               |                                                                                                                                                       |
| Background and objectives | 2a   | Scientific background and explanation of rationale                                                                      | CONSORT-AI a (i)<br>Extension | Explain the intended use of the AI intervention in the context of the clinical pathway, including its purpose and its intended users (e.g. healthcare |

|                |    |                                                                                                    |                              |                                                                                                                       |  |
|----------------|----|----------------------------------------------------------------------------------------------------|------------------------------|-----------------------------------------------------------------------------------------------------------------------|--|
|                |    |                                                                                                    |                              | professionals, patients, public).                                                                                     |  |
|                | 2b | Specific objectives or hypotheses                                                                  |                              |                                                                                                                       |  |
| <b>Methods</b> |    |                                                                                                    |                              |                                                                                                                       |  |
| Trial design   | 3a | Description of trial design (such as parallel, factorial) including allocation ratio               |                              |                                                                                                                       |  |
|                | 3b | Important changes to methods after trial commencement (such as eligibility criteria), with reasons |                              |                                                                                                                       |  |
| Participants   | 4a | Eligibility criteria for participants                                                              | CONSORT-AI a (i) Elaboration | State the inclusion and exclusion criteria at the level of participants.                                              |  |
|                |    |                                                                                                    | CONSORT-AI a (ii) Extension  | State the inclusion and exclusion criteria at the level of the input data.                                            |  |
|                | 4b | Settings and locations where the data were collected                                               | CONSORT-AI b Extension       | Describe how the AI intervention was integrated into the trial setting, including any onsite or on site requirements. |  |

|               |    |                                                                                                                                       |                            |                                                                                                                                      |  |
|---------------|----|---------------------------------------------------------------------------------------------------------------------------------------|----------------------------|--------------------------------------------------------------------------------------------------------------------------------------|--|
| Interventions | 5  | The interventions for each group with sufficient details to allow replication, including how and when they were actually administered | CONSORT-AI (i) Extension   | State which version of the AI algorithm was used.                                                                                    |  |
|               |    |                                                                                                                                       | CONSORT-AI (ii) Extension  | Describe how the input data were acquired and selected for the AI intervention.                                                      |  |
|               |    |                                                                                                                                       | CONSORT-AI (iii) Extension | Describe how poor quality or unavailable input data were assessed and handled.                                                       |  |
|               |    |                                                                                                                                       | CONSORT-AI (iv) Extension. | Specify whether there was human-AI interaction in the handling of the input data, and what level of expertise was required of users. |  |
|               |    |                                                                                                                                       | CONSORT-AI (v) Extension   | Specify the output of the AI intervention                                                                                            |  |
|               |    |                                                                                                                                       | CONSORT-AI (vi) Extension  | Explain how the AI intervention's outputs contributed to decision-making or other elements of clinical practice.                     |  |
| Outcomes      | 6a | Completely defined pre-specified primary and secondary outcome                                                                        |                            |                                                                                                                                      |  |

|                                  |    |                                                                                                                                                  |  |  |  |
|----------------------------------|----|--------------------------------------------------------------------------------------------------------------------------------------------------|--|--|--|
|                                  |    | measures, including how and when they were assessed                                                                                              |  |  |  |
|                                  | 6b | Any changes to trial outcomes after the trial commenced, with reasons                                                                            |  |  |  |
| Sample size                      | 7a | How sample size was determined                                                                                                                   |  |  |  |
|                                  | 7b | When applicable, explanation of any interim analyses and stopping guidelines                                                                     |  |  |  |
| Sequence generation              | 8a | Method used to generate the random allocation sequence                                                                                           |  |  |  |
|                                  | 8b | Type of randomization; details of any restriction (such as blocking and block size)                                                              |  |  |  |
| <b>Randomization</b>             |    |                                                                                                                                                  |  |  |  |
| Allocation concealment mechanism | 9  | Mechanism used to implement the random allocation sequence (such as sequentially numbered containers), describing any steps taken to conceal the |  |  |  |

|                     |     |                                                                                                                                          |  |  |  |
|---------------------|-----|------------------------------------------------------------------------------------------------------------------------------------------|--|--|--|
|                     |     | sequence until interventions were assigned                                                                                               |  |  |  |
| Implementation      | 10  | Who generated the random allocation sequence, who enrolled participants, and who assigned participants to interventions                  |  |  |  |
| Blinding            | 11a | If done, who was blinded after assignment to interventions (for example, participants, care providers, those assessing outcomes) and how |  |  |  |
|                     | 11b | If relevant, description of the similarity of interventions                                                                              |  |  |  |
| Statistical methods | 12a | Statistical methods used to compare groups for primary and secondary outcomes                                                            |  |  |  |
|                     | 12b | Methods for additional analyses, such as subgroup analyses and adjusted analyses                                                         |  |  |  |
| <b>Results</b>      |     |                                                                                                                                          |  |  |  |



|                                                         |     |                                                                                                                                                |  |  |  |
|---------------------------------------------------------|-----|------------------------------------------------------------------------------------------------------------------------------------------------|--|--|--|
| Participant flow<br>(a diagram is strongly recommended) | 13a | For each group, the numbers of participants who were randomly assigned, received intended treatment, and were analyzed for the primary outcome |  |  |  |
|                                                         | 13b | For each group, losses and exclusions after randomization, together with reasons                                                               |  |  |  |
| Recruitment                                             | 14a | Dates defining the periods of recruitment and follow-up                                                                                        |  |  |  |
|                                                         | 14b | Why the trial ended or was stopped                                                                                                             |  |  |  |
| Baseline data                                           | 15  | A table showing baseline demographic and clinical characteristics for each group                                                               |  |  |  |
| Numbers analyzed                                        | 16  | For each group, number of participants (denominator) included in each analysis and whether the analysis was by original assigned groups        |  |  |  |
| Outcomes and estimation                                 | 17a | For each primary and secondary outcome,                                                                                                        |  |  |  |

|                    |     |                                                                                                                                           |                      |                                                                                                                                                                    |  |
|--------------------|-----|-------------------------------------------------------------------------------------------------------------------------------------------|----------------------|--------------------------------------------------------------------------------------------------------------------------------------------------------------------|--|
|                    |     | results for each group, and the estimated effect size and its precision (such as % confidence interval)                                   |                      |                                                                                                                                                                    |  |
|                    | 17b | For binary outcomes, presentation of both absolute and relative effect sizes is recommended                                               |                      |                                                                                                                                                                    |  |
| Ancillary analyses | 18  | Results of any other analyses performed, including subgroup analyses and adjusted analyses, distinguishing pre-specified from exploratory |                      |                                                                                                                                                                    |  |
| Harms              | 19  | All important harms or unintended effects in each group (for specific guidance see CONSORT for harms)                                     | CONSORT-AI Extension | Describe results of any analysis of performance errors and how errors were identified, where applicable. If no such analysis was planned or done, justify why not. |  |
| <b>Discussion</b>  |     |                                                                                                                                           |                      |                                                                                                                                                                    |  |
| Limitations        | 20  | Trial limitations, addressing sources of potential bias,                                                                                  |                      |                                                                                                                                                                    |  |

|                          |    |                                                                                                               |                       |                                                                                                                            |  |
|--------------------------|----|---------------------------------------------------------------------------------------------------------------|-----------------------|----------------------------------------------------------------------------------------------------------------------------|--|
|                          |    | imprecision, and, if relevant, multiplicity of analyses                                                       |                       |                                                                                                                            |  |
| Generalizability         | 21 | Generalizability (external validity, applicability) of the trial findings                                     |                       |                                                                                                                            |  |
| Interpretation           | 22 | Interpretation consistent with results, balancing benefits and harms, and considering other relevant evidence |                       |                                                                                                                            |  |
| <b>Other information</b> |    |                                                                                                               |                       |                                                                                                                            |  |
| Registration             | 23 | Registration number and name of trial registry                                                                |                       |                                                                                                                            |  |
| Protocol                 | 24 | Where the full trial protocol can be accessed, if available                                                   |                       |                                                                                                                            |  |
| Funding                  | 25 | Sources of funding and other support (such as supply of drugs), role of funders                               | CONSORT-AI Extension. | State whether and how the AI intervention and/or its code can be accessed, including any restrictions to access or re-use. |  |
|                          |    |                                                                                                               |                       |                                                                                                                            |  |

1  
2  
3 \*Indicates page numbers to be completed by authors during protocol development  
4

5 \*\* 22. Liu X, Faes L, Calvert MJ, Denniston AK. Extension of the CONSORT and SPIRIT statements. The  
6 Lancet 2019;394(10205):1225.  
7  
8  
9

10  
11  
12  
13  
14  
15  
16  
17  
18  
19  
20  
21  
22  
23  
24  
25  
26  
27  
28  
29  
30  
31  
32  
33  
34  
35  
36  
37  
38  
39  
40  
41  
42  
43  
44  
45  
46  
47  
48  
49  
50  
51  
52  
53  
54  
55  
56  
57  
58  
59  
60

For peer review only

1  
2  
3  
4  
5  
6  
7  
8  
9  
10  
11  
12  
13  
14  
15  
16  
17  
18  
19  
20  
21  
22  
23  
24  
25  
26  
27  
28  
29  
30  
31  
32  
33  
34  
35  
36  
37  
38  
39  
40  
41  
42  
43  
44  
45  
46

Supplementary table 2: Included studies

| No. | Authors               | Year | Title                                                                                                                                          | Country          | Specialty  | Disease studied      | Sample size | Intervention                                        | Control                                                                | Blinding                   | Primary outcome             | Trial registration |
|-----|-----------------------|------|------------------------------------------------------------------------------------------------------------------------------------------------|------------------|------------|----------------------|-------------|-----------------------------------------------------|------------------------------------------------------------------------|----------------------------|-----------------------------|--------------------|
| 1.  | Sadasiva<br>m, et al. | 2016 | Impact of a<br>Collective<br>Intelligence<br>Tailored Messaging<br>System on Smoking<br>Cessation: The<br>Perspect<br>Randomized<br>Experiment | United<br>States | Medicine   | Smoking<br>addiction | 120         | AI<br>recommended<br>motivational<br>messages       | Standard<br>tailored<br>messages                                       | Single<br>(study<br>staff) | Influence<br>of<br>messages | NR                 |
| 2.  | Morrison<br>, et al.  | 2017 | The Effect of<br>Timing and<br>Frequency of Push<br>Notifications on<br>Usage of a<br>Smartphone- Based<br>Stress Management                   | United<br>States | Psychiatry | Stress               | 77          | Smartphone-<br>based stress<br>management<br>system | Daily/oc<br>casional<br>notificati<br>ons<br>within<br>pre-<br>defined | Not stated                 | Notificatio<br>n response   | ISRCTN6717<br>7737 |

|    |                  |      |                                                                                                         |                |                  |                 |      |                                                      |                      |            |                        |                     |
|----|------------------|------|---------------------------------------------------------------------------------------------------------|----------------|------------------|-----------------|------|------------------------------------------------------|----------------------|------------|------------------------|---------------------|
|    |                  |      | Intervention: An Exploratory Trial                                                                      |                |                  |                 |      |                                                      | time frames          |            |                        |                     |
| 3. | Labovitz, et al. | 2017 | Using Artificial Intelligence to Reduce the Risk of Nonadherence in Patients on Anticoagulation Therapy | United States  | Cardiology       | Ischemic stroke | 28   | AI system monitoring                                 | No daily monitoring  | Not stated | Adherence to therapy   | NCT02599259         |
| 4. | Rostill, et al.  | 2018 | Technology integrated health management for dementia                                                    | United Kingdom | Psychiatry       | Dementia        | 408  | Technology-integrated health management for dementia | No TIHM              | Not stated | Alerts                 | NR                  |
| 5. | Wang, et al      | 2018 | Real-time automatic detection system increases colonoscopic polyp and adenoma                           | China          | Gastroenterology | Adenoma         | 1058 | AI-aided colonoscopy                                 | Standard colonoscopy | None       | Adenoma detection rate | ChiCTR-DDD-17012221 |

1  
2  
3  
4  
5  
6  
7  
8  
9  
10  
11  
12  
13  
14  
15  
16  
17  
18  
19  
20  
21  
22  
23  
24  
25  
26  
27  
28  
29  
30  
31  
32  
33  
34  
35  
36  
37  
38  
39  
40  
41  
42  
43  
44  
45  
46

|    |             |      |                                                                                                                                                                                       |       |               |          |     |                                |               |        |                                              |                 |
|----|-------------|------|---------------------------------------------------------------------------------------------------------------------------------------------------------------------------------------|-------|---------------|----------|-----|--------------------------------|---------------|--------|----------------------------------------------|-----------------|
|    |             |      | detection rates: a prospective randomised controlled study                                                                                                                            |       |               |          |     |                                |               |        |                                              |                 |
| 6. | Lin, et al. | 2019 | Diagnostic Efficacy and Therapeutic Decision-making Capacity of an Artificial Intelligence Platform for Childhood Cataracts in Eye Clinics: A Multicentre Randomized Controlled Trial | China | Ophthalmology | Cataract | 350 | AI-assisted cataract detection | Normal clinic | Double | Diagnostic accuracy for congenital cataracts | NCT0324084<br>8 |

|    |              |      |                                                                                                                                           |               |                  |                  |     |                                      |                                      |        |                                                     |                  |
|----|--------------|------|-------------------------------------------------------------------------------------------------------------------------------------------|---------------|------------------|------------------|-----|--------------------------------------|--------------------------------------|--------|-----------------------------------------------------|------------------|
| 7. | Voss, et al. | 2019 | Effect of Wearable Digital Intervention for Improving Socialization in Children With Autism Spectrum Disorder A Randomized Clinical Trial | United States | Psychiatry       | Autism           | 474 | AI-driven behavioral intervention    | Applied behavioral analysis therapy  | Single | SRS-II, EGG, VABS-II, NEPSY-II socialization scores | NCT03569176      |
| 8. | Wu, et al.   | 2019 | Randomised controlled trial of WISENSE, a real-time quality improving system for monitoring blind spots                                   | China         | Gastroenterology | Upper GI lesions | 324 | AI-aided esophagogastrroduodenoscopy | Standard esophagogastrroduodenoscopy | Single | Blind spot rate                                     | ChiCTR1800014809 |



1  
2  
3  
4  
5  
6  
7  
8  
9  
10  
11  
12  
13  
14  
15  
16  
17  
18  
19  
20  
21  
22  
23  
24  
25  
26  
27  
28  
29  
30  
31  
32  
33  
34  
35  
36  
37  
38  
39  
40  
41  
42  
43  
44  
45  
46

|     |                 |      |                                                                                                                                                    |               |                      |                  |      |                           |                                      |        |                                              |                      |
|-----|-----------------|------|----------------------------------------------------------------------------------------------------------------------------------------------------|---------------|----------------------|------------------|------|---------------------------|--------------------------------------|--------|----------------------------------------------|----------------------|
|     |                 |      | during<br>esophagogastroduo<br>denoscopy                                                                                                           |               |                      |                  |      |                           |                                      |        |                                              |                      |
| 9.  | Wang, et al.    | 2020 | Effect of a deep-learning computer-aided detection system on adenoma detection during colonoscopy (CADE-DB trial): a double-blind randomised study | China         | Gastroente<br>rology | Adenom<br>a      | 1046 | AI-aided<br>colonoscopy   | Sham                                 | Double | Adenoma<br>detection<br>rate                 | ChiCTR1800<br>017675 |
| 10. | Persell, et al. | 2020 | Effect of Home Blood Pressure Monitoring via a Smartphone Hypertension Coaching                                                                    | United States | Medicine             | Hyperten<br>sion | 333  | AI-driven<br>coaching app | Blood<br>pressure<br>tracking<br>app | None   | Systolic<br>blood<br>pressure at<br>6 months | NCT0328814<br>2      |

|     |                       |      |                                                                                                                                                               |                 |            |                                        |    |                                                                           |                  |      |                                                                          |                 |
|-----|-----------------------|------|---------------------------------------------------------------------------------------------------------------------------------------------------------------|-----------------|------------|----------------------------------------|----|---------------------------------------------------------------------------|------------------|------|--------------------------------------------------------------------------|-----------------|
|     |                       |      | Application or Tracking Application on Adults With Uncontrolled Hypertension A Randomized Clinical Trial                                                      |                 |            |                                        |    |                                                                           |                  |      |                                                                          |                 |
| 11. | Wijnberg<br>e, et al. | 2020 | Effect of a Machine Learning-Derived Early Warning System for Intraoperative Hypotension vs Standard Care on Depth and Duration of Intraoperative Hypotension | Netherl<br>ands | Cardiology | Intra-<br>operative<br>hypotens<br>ion | 68 | AI-driven<br>early warning<br>system for<br>intraoperative<br>hypotension | Standard<br>care | None | Time-<br>weighted<br>average of<br>intraoperat<br>ive<br>hypotensio<br>n | NCT0337634<br>7 |

1  
2  
3  
4  
5  
6  
7  
8  
9  
10  
11  
12  
13  
14  
15  
16  
17  
18  
19  
20  
21  
22  
23  
24  
25  
26  
27  
28  
29  
30  
31  
32  
33  
34  
35  
36  
37  
38  
39  
40  
41  
42  
43  
44  
45  
46

|     |               |      |                                                                                                            |                |               |                   |     |                                       |                       |        |                                                                       |             |
|-----|---------------|------|------------------------------------------------------------------------------------------------------------|----------------|---------------|-------------------|-----|---------------------------------------|-----------------------|--------|-----------------------------------------------------------------------|-------------|
|     |               |      | During Elective<br>Noncardiac Surgery<br>The HYPE<br>Randomized<br>Clinical Trial                          |                |               |                   |     |                                       |                       |        |                                                                       |             |
| 12. | Pavel, et al. | 2020 | A machine-learning algorithm for neonatal seizure recognition: a multicentre, randomised, controlled trial | United Kingdom | Neurology     | Neonatal seizures | 264 | Automated seizure detection algorithm | Conventional EEG      | Single | Diagnostic accuracy of healthcare professionals with aid of algorithm | NCT02431780 |
| 13. | Nimri, et al. | 2020 | Insulin dose optimization using an automated artificial intelligence-based decision support                | Israel         | Endocrinology | Diabetes          | 108 | AI-based decision support system      | Physician guided care | Single | Time of glucose level within target range                             | NCT03003806 |

|     |              |      |                                                                                                                                  |       |                  |         |     |                      |                        |        |                        |                  |
|-----|--------------|------|----------------------------------------------------------------------------------------------------------------------------------|-------|------------------|---------|-----|----------------------|------------------------|--------|------------------------|------------------|
|     |              |      | system in youths with type 1 diabetes                                                                                            |       |                  |         |     |                      |                        |        |                        |                  |
| 14. | Liu, et al.  | 2020 | The single-monitor trial: an embedded CAde system increased adenoma detection during colonoscopy: a prospective randomized study | China | Gastroenterology | Adenoma | 790 | AI-aided colonoscopy | Routine colonoscopy    | None   | Adenoma detection rate | ChiCTR1800018058 |
| 15. | Gong, et al. | 2020 | Detection of colorectal adenomas with a real-time computer-aided system (ENDOANGEL): a randomised                                | China | Gastroenterology | Adenoma | 704 | AI-aided colonoscopy | Unassisted colonoscopy | Single | Adenoma detection rate | ChiCTR1900021984 |

|  |  |  |                  |  |  |  |  |  |  |  |  |  |
|--|--|--|------------------|--|--|--|--|--|--|--|--|--|
|  |  |  | controlled study |  |  |  |  |  |  |  |  |  |
|--|--|--|------------------|--|--|--|--|--|--|--|--|--|

1. Sadasivam RS, Borglund EM, Adams R, Marlin BM, Houston TK. Impact of a collective intelligence tailored messaging system on smoking cessation: the Perspect randomized experiment. *JMIR* 2016;18(11):e285.
2. Morrison LG, Hargood C, Pejovic V, Geraghty AW, Lloyd S, Goodman N, et al. The effect of timing and frequency of push notifications on usage of a smartphone-based stress management intervention: an exploratory trial. *PloS one* 2017;12(1):e0169162.
3. Labovitz DL, Shafner L, Reyes Gil M, Virmani D, Hanina A. Using artificial intelligence to reduce the risk of nonadherence in patients on anticoagulation therapy. *Stroke* 2017;48(5):1416-9.
4. Rostill H, Nilforooshan R, Morgan A, Barnaghi P, Ream E, Chrysanthaki T. Technology integrated health management for dementia. *Br J Community Nurs* 2018;23(10):502-8.
5. Wang P, Berzin TM, Brown JRG, Bharadwaj S, Becq A, Xiao X, et al. Real-time automatic detection system increases colonoscopic polyp and adenoma detection rates: a prospective randomised controlled study. *Gut* 2019;68(10):1813-9.
6. Lin H, Li R, Liu Z, Chen J, Yang Y, Chen H, et al. Diagnostic efficacy and therapeutic decision-making capacity of an artificial intelligence platform for childhood cataracts in eye clinics: a multicentre randomized controlled trial. *EClinicalMedicine* 2019; 9: 52–9.

- 1  
2  
3 7. Voss C, Schwartz J, Daniels J, Kline A, Haber N, Washington P, et al. Effect of wearable digital intervention for improving  
4 socialization in children with autism spectrum disorder: a randomized clinical trial. *JAMA Pediatr* 2019;173(5):446-54.  
5  
6
- 7  
8 8. Wu L, Zhang J, Zhou W, An P, Shen L, Liu J, et al. Randomised controlled trial of WISENSE, a real-time quality improving system  
9 for monitoring blind spots during esophagogastroduodenoscopy. *Gut* 2019;68(12):2161-9.  
10  
11
- 12 9. Wang P, Liu X, Berzin TM, Brown JRG, Liu P, Zhou C, et al. Effect of a deep-learning computer-aided detection system on  
13 adenoma detection during colonoscopy (CADE-DB trial): a double-blind randomised study. *Lancet Gastroenterol Hepatol*  
14 2020;5(4):343-51.  
15  
16
- 17 10. Persell SD, Peprah YA, Lipiszko D, Lee JY, Li JJ, Ciolino JD, et al. Effect of home blood pressure monitoring via a smartphone  
18 hypertension coaching application or tracking application on adults with uncontrolled hypertension: a randomized clinical trial. *JAMA*  
19 *Netw Open* 2020;3(3):e200255-e.  
20  
21
- 22 11. Wijnberge M, Geerts BF, Hol L, Lemmers N, Mulder MP, Berge P, et al. Effect of a machine learning–derived early warning system  
23 for intraoperative hypotension vs standard care on depth and duration of intraoperative hypotension during elective noncardiac  
24 surgery: the HYPE randomized clinical trial. *JAMA* 2020;323(11):1052-60.  
25  
26
- 27 12. Pavel AM, Rennie JM, de Vries LS, Blennow M, Foran A, Shah DK, et al. A machine-learning algorithm for neonatal seizure  
28 recognition: a multicentre, randomised, controlled trial. *The Lancet Child & Adolescent Health* 2020;4(10):740-9.  
29  
30  
31  
32  
33  
34  
35  
36  
37  
38  
39  
40  
41  
42  
43  
44  
45  
46

- 1  
2  
3 13. Nimri R, Battelino T, Laffel LM, Slover RH, Schatz D, Weinzimer SA, et al. Insulin dose optimization using an automated artificial  
4 intelligence-based decision support system in youths with type 1 diabetes. *Nature medicine* 2020;26(9):1380-4.  
5  
6  
7  
8 14. Liu P, Wang P, Glissen Brown JR, Berzin TM, Zhou G, Liu W, et al. The single-monitor trial: an embedded CADe system increased  
9 adenoma detection during colonoscopy: a prospective randomized study. *Therap Adv Gastroenterol* 2020;13:1756284820979165.  
10  
11  
12 15. Gong D, Wu L, Zhang J, Mu G, Shen L, Liu J, et al. Detection of colorectal adenomas with a real-time computer-aided system  
13 (ENDOANGEL): a randomised controlled study. *Lancet Gastroenterol Hepatol* 2020;5(4):352-61.  
14  
15  
16  
17  
18  
19  
20  
21  
22  
23  
24  
25  
26  
27  
28  
29  
30  
31  
32  
33  
34  
35  
36  
37  
38  
39  
40  
41  
42  
43  
44  
45  
46

1  
2  
3 **APPENDIX 1**  
4  
5  
6

7 **EMBASE:**  
8

- 9 1) \*deep learning/  
10 2) \*artificial intelligence/  
11 3) \*machine learning/  
12 4) 1 or 2 or 3  
13

14 **PubMed:**  
15

- 16 1. Artificial intelligence  
17 2. Machine learning  
18 3. Deep learning  
19 4. 1 OR 2 OR 3  
20  
21  
22

23 **Restricted to:**  
24

- 25 • Article type: Randomized Control Trial  
26 • Publication Date: 1/01/2015 to 31/12/2020  
27 • Species: Human  
28 • Language: English  
29  
30  
31  
32  
33  
34  
35  
36  
37  
38  
39  
40  
41  
42  
43  
44  
45  
46  
47  
48  
49  
50  
51  
52  
53  
54  
55  
56  
57  
58  
59  
60



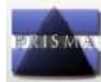

## PRISMA 2020 Checklist

| Section and Topic             | Item # | Checklist item                                                                                                                                                                                                                                                                                       | Location where item is reported |
|-------------------------------|--------|------------------------------------------------------------------------------------------------------------------------------------------------------------------------------------------------------------------------------------------------------------------------------------------------------|---------------------------------|
| <b>TITLE</b>                  |        |                                                                                                                                                                                                                                                                                                      |                                 |
| Title                         | 1      | Identify the report as a systematic review.                                                                                                                                                                                                                                                          | Page 1                          |
| <b>ABSTRACT</b>               |        |                                                                                                                                                                                                                                                                                                      |                                 |
| Abstract                      | 2      | See the PRISMA 2020 for Abstracts checklist.                                                                                                                                                                                                                                                         | Page 3                          |
| <b>INTRODUCTION</b>           |        |                                                                                                                                                                                                                                                                                                      |                                 |
| Rationale                     | 3      | Describe the rationale for the review in the context of existing knowledge.                                                                                                                                                                                                                          | Page 4                          |
| Objectives                    | 4      | Provide an explicit statement of the objective(s) or question(s) the review addresses.                                                                                                                                                                                                               | Page 5                          |
| <b>METHODS</b>                |        |                                                                                                                                                                                                                                                                                                      |                                 |
| Eligibility criteria          | 5      | Specify the inclusion and exclusion criteria for the review and how studies were grouped for the syntheses.                                                                                                                                                                                          | Page 5-6                        |
| Information sources           | 6      | Specify all databases, registers, websites, organisations, reference lists and other sources searched or consulted to identify studies. Specify the date when each source was last searched or consulted.                                                                                            | Page 5                          |
| Search strategy               | 7      | Present the full search strategies for all databases, registers and websites, including any filters and limits used.                                                                                                                                                                                 | Page 5 + appendix 1             |
| Selection process             | 8      | Specify the methods used to decide whether a study met the inclusion criteria of the review, including how many reviewers screened each record and each report retrieved, whether they worked independently, and if applicable, details of automation tools used in the process.                     | Page 5-6                        |
| Data collection process       | 9      | Specify the methods used to collect data from reports, including how many reviewers collected data from each report, whether they worked independently, any processes for obtaining or confirming data from study investigators, and if applicable, details of automation tools used in the process. | Page 5-6                        |
| Data items                    | 10a    | List and define all outcomes for which data were sought. Specify whether all results that were compatible with each outcome domain in each study were sought (e.g. for all measures, time points, analyses), and if not, the methods used to decide which results to collect.                        | Page 6                          |
|                               | 10b    | List and define all other variables for which data were sought (e.g. participant and intervention characteristics, funding sources). Describe any assumptions made about any missing or unclear information.                                                                                         | NA                              |
| Study risk of bias assessment | 11     | Specify the methods used to assess risk of bias in the included studies, including details of the tool(s) used, how many reviewers assessed each study and whether they worked independently, and if applicable, details of automation tools used in the process.                                    | Page 5                          |
| Effect measures               | 12     | Specify for each outcome the effect measure(s) (e.g. risk ratio, mean difference) used in the synthesis or presentation of results.                                                                                                                                                                  | 14                              |
| Synthesis methods             | 13a    | Describe the processes used to decide which studies were eligible for each synthesis (e.g. tabulating the study intervention characteristics and comparing against the planned groups for each synthesis (item #5)).                                                                                 | Figure 1                        |
|                               | 13b    | Describe any methods required to prepare the data for presentation or synthesis, such as handling of missing summary statistics, or data conversions.                                                                                                                                                | NA                              |
|                               | 13c    | Describe any methods used to tabulate or visually display results of individual studies and syntheses.                                                                                                                                                                                               | Table 2                         |
|                               | 13d    | Describe any methods used to synthesize results and provide a rationale for the choice(s). If meta-analysis was performed, describe the model(s), method(s) to identify the presence and extent of statistical heterogeneity, and software package(s) used.                                          | Page 6                          |
|                               | 13e    | Describe any methods used to explore possible causes of heterogeneity among study results (e.g. subgroup analysis, meta-regression).                                                                                                                                                                 | NA                              |
|                               | 13f    | Describe any sensitivity analyses conducted to assess robustness of the synthesized results.                                                                                                                                                                                                         | NA                              |
| Reporting bias assessment     | 14     | Describe any methods used to assess risk of bias due to missing results in a synthesis (arising from reporting biases).                                                                                                                                                                              | Not reported                    |

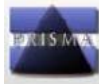

## PRISMA 2020 Checklist

| Section and Topic             | Item # | Checklist item                                                                                                                                                                                                                                                                       | Location where item is reported |
|-------------------------------|--------|--------------------------------------------------------------------------------------------------------------------------------------------------------------------------------------------------------------------------------------------------------------------------------------|---------------------------------|
| Certainty assessment          | 15     | Describe any methods used to assess certainty (or confidence) in the body of evidence for an outcome.                                                                                                                                                                                | NA                              |
| <b>RESULTS</b>                |        |                                                                                                                                                                                                                                                                                      |                                 |
| Study selection               | 16a    | Describe the results of the search and selection process, from the number of records identified in the search to the number of studies included in the review, ideally using a flow diagram.                                                                                         | Page 14, figure 1               |
|                               | 16b    | Cite studies that might appear to meet the inclusion criteria, but which were excluded, and explain why they were excluded.                                                                                                                                                          | Not reported                    |
| Study characteristics         | 17     | Cite each included study and present its characteristics.                                                                                                                                                                                                                            | Table 2                         |
| Risk of bias in studies       | 18     | Present assessments of risk of bias for each included study.                                                                                                                                                                                                                         | Not reported                    |
| Results of individual studies | 19     | For all outcomes, present, for each study: (a) summary statistics for each group (where appropriate) and (b) an effect estimate and its precision (e.g. confidence/credible interval), ideally using structured tables or plots.                                                     | Not reported                    |
| Results of syntheses          | 20a    | For each synthesis, briefly summarise the characteristics and risk of bias among contributing studies.                                                                                                                                                                               | Not reported                    |
|                               | 20b    | Present results of all statistical syntheses conducted. If meta-analysis was done, present for each the summary estimate and its precision (e.g. confidence/credible interval) and measures of statistical heterogeneity. If comparing groups, describe the direction of the effect. | Table 3                         |
|                               | 20c    | Present results of all investigations of possible causes of heterogeneity among study results.                                                                                                                                                                                       | Not reported                    |
|                               | 20d    | Present results of all sensitivity analyses conducted to assess the robustness of the synthesized results.                                                                                                                                                                           | Not reported                    |
| Reporting biases              | 21     | Present assessments of risk of bias due to missing results (arising from reporting biases) for each synthesis assessed.                                                                                                                                                              | Not reported                    |
| Certainty of evidence         | 22     | Present assessments of certainty (or confidence) in the body of evidence for each outcome assessed.                                                                                                                                                                                  | Not reported                    |
| <b>DISCUSSION</b>             |        |                                                                                                                                                                                                                                                                                      |                                 |
| Discussion                    | 23a    | Provide a general interpretation of the results in the context of other evidence.                                                                                                                                                                                                    | Page 27                         |
|                               | 23b    | Discuss any limitations of the evidence included in the review.                                                                                                                                                                                                                      | Page 27-31                      |
|                               | 23c    | Discuss any limitations of the review processes used.                                                                                                                                                                                                                                | Page 31                         |
|                               | 23d    | Discuss implications of the results for practice, policy, and future research.                                                                                                                                                                                                       | Page 31                         |
| <b>OTHER INFORMATION</b>      |        |                                                                                                                                                                                                                                                                                      |                                 |
| Registration and protocol     | 24a    | Provide registration information for the review, including register name and registration number, or state that the review was not registered.                                                                                                                                       | Page 14                         |
|                               | 24b    | Indicate where the review protocol can be accessed, or state that a protocol was not prepared.                                                                                                                                                                                       | Page 14                         |
|                               | 24c    | Describe and explain any amendments to information provided at registration or in the protocol.                                                                                                                                                                                      | NA                              |
| Support                       | 25     | Describe sources of financial or non-financial support for the review, and the role of the funders or sponsors in the review.                                                                                                                                                        | Page 1                          |
| Competing interests           | 26     | Declare any competing interests of review authors.<br><a href="http://bmjopen.bmj.com/site/about/guidelines.xhtml">http://bmjopen.bmj.com/site/about/guidelines.xhtml</a>                                                                                                            | Not                             |

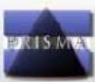

# PRISMA 2020 Checklist

1  
2  
3  
4  
5  
6  
7  
8  
9  
10  
11  
12  
13  
14  
15  
16  
17  
18  
19  
20  
21  
22  
23  
24  
25  
26  
27  
28  
29  
30  
31  
32  
33  
34  
35  
36  
37  
38  
39  
40  
41  
42  
43  
44  
45  
46  
47

| Section and Topic                              | Item # | Checklist item                                                                                                                                                                                                                             | Location where item is reported |
|------------------------------------------------|--------|--------------------------------------------------------------------------------------------------------------------------------------------------------------------------------------------------------------------------------------------|---------------------------------|
| interests                                      |        |                                                                                                                                                                                                                                            | reported                        |
| Availability of data, code and other materials | 27     | Report which of the following are publicly available and where they can be found: template data collection forms; data extracted from included studies; data used for all analyses; analytic code; any other materials used in the review. | Not reported                    |

From: Page MJ, McKenzie JE, Bossuyt PM, Boutron I, Hoffmann TC, Mulrow CD, et al. The PRISMA 2020 statement: an updated guideline for reporting systematic reviews. *BMJ* 2021;372:n71. doi: 10.1136/bmj.n71  
 For more information, visit: <http://www.prisma-statement.org/>

For peer review only

# BMJ Open

## Quality of reporting of randomised controlled trials in artificial intelligence in health care: a systematic review

|                                 |                                                                                                                                                                                      |
|---------------------------------|--------------------------------------------------------------------------------------------------------------------------------------------------------------------------------------|
| Journal:                        | <i>BMJ Open</i>                                                                                                                                                                      |
| Manuscript ID                   | bmjopen-2022-061519.R1                                                                                                                                                               |
| Article Type:                   | Original research                                                                                                                                                                    |
| Date Submitted by the Author:   | 14-Jul-2022                                                                                                                                                                          |
| Complete List of Authors:       | Shahzad, Rida; Shahzad Eye Hospital Ayub, Bushra; Aga Khan University Hospital Siddiqui, M. A. Rehman; Aga Khan University Hospital, Department of Ophthalmology and Visual Sciences |
| <b>Primary Subject Heading</b>: | Medical publishing and peer review                                                                                                                                                   |
| Secondary Subject Heading:      | Qualitative research                                                                                                                                                                 |
| Keywords:                       | STATISTICS & RESEARCH METHODS, Clinical trials < THERAPEUTICS, Health informatics < BIOTECHNOLOGY & BIOINFORMATICS                                                                   |
|                                 |                                                                                                                                                                                      |

SCHOLARONE™  
Manuscripts



I, the Submitting Author has the right to grant and does grant on behalf of all authors of the Work (as defined in the below author licence), an exclusive licence and/or a non-exclusive licence for contributions from authors who are: i) UK Crown employees; ii) where BMJ has agreed a CC-BY licence shall apply, and/or iii) in accordance with the terms applicable for US Federal Government officers or employees acting as part of their official duties; on a worldwide, perpetual, irrevocable, royalty-free basis to BMJ Publishing Group Ltd ("BMJ") its licensees and where the relevant Journal is co-owned by BMJ to the co-owners of the Journal, to publish the Work in this journal and any other BMJ products and to exploit all rights, as set out in our [licence](#).

The Submitting Author accepts and understands that any supply made under these terms is made by BMJ to the Submitting Author unless you are acting as an employee on behalf of your employer or a postgraduate student of an affiliated institution which is paying any applicable article publishing charge ("APC") for Open Access articles. Where the Submitting Author wishes to make the Work available on an Open Access basis (and intends to pay the relevant APC), the terms of reuse of such Open Access shall be governed by a Creative Commons licence – details of these licences and which [Creative Commons](#) licence will apply to this Work are set out in our licence referred to above.

Other than as permitted in any relevant BMJ Author's Self Archiving Policies, I confirm this Work has not been accepted for publication elsewhere, is not being considered for publication elsewhere and does not duplicate material already published. I confirm all authors consent to publication of this Work and authorise the granting of this licence.

1  
2  
3  
4 **Title: Quality of reporting of randomised controlled trials in artificial intelligence in**  
5  
6 **health care: a systematic review**  
7  
8  
9

10  
11 **Authors:**  
12

13 Rida Shahzad<sup>1</sup>  
14

15 Bushra Ayub<sup>2</sup>  
16

17 M. A. Rehman Siddiqui<sup>1,3,4</sup>  
18  
19

20  
21  
22 **Authors Affiliations:**  
23

- 24  
25 1. Shahzad Eye Hospital, Karachi, Pakistan  
26  
27 2. Aga Khan University Hospital, Karachi, Pakistan  
28  
29 3. Department of Ophthalmology and Visual Sciences, Aga Khan University Hospital,  
30 Karachi, Pakistan  
31  
32 4. The Eye Centre, South City Hospital, Karachi, Pakistan  
33  
34  
35  
36  
37  
38

39 **Corresponding author:**  
40

41 M. A. Rehman Siddiqui  
42

43 Department of Ophthalmology and Visual Sciences,  
44

45 Aga Khan University Hospital,  
46

47 National Stadium Road, P.O. Box 3500,  
48

49 Karachi, Pakistan  
50

51 Email: [rehman.siddiqui@gmail.com](mailto:rehman.siddiqui@gmail.com)  
52  
53  
54  
55

56  
57 **Funding:** None  
58  
59  
60

1  
2  
3 **Keywords:**  
4

5 CONSORT, CONSORT-AI, artificial intelligence, deep learning, machine learning,  
6  
7 randomised controlled trials.  
8  
9

10  
11  
12 **Word count:** 2430 words  
13  
14  
15  
16  
17  
18  
19  
20  
21  
22  
23  
24  
25  
26  
27  
28  
29  
30  
31  
32  
33  
34  
35  
36  
37  
38  
39  
40  
41  
42  
43  
44  
45  
46  
47  
48  
49  
50  
51  
52  
53  
54  
55  
56  
57  
58  
59  
60

For peer review only

## ABSTRACT

**Objectives:** The aim of this study was to evaluate the quality of reporting of randomised controlled trials (RCTs) of artificial intelligence (AI) in health care against Consolidated Standards of Reporting Trials – Artificial Intelligence (CONSORT-AI) guidelines.

**Design:** Systematic review

**Data sources:** We used PubMed and EMBASE databases to include studies from 2015 to 2021.

**Eligibility criteria:** We included RCTs which used AI as the intervention. Studies were in the English language. Protocols, conference abstracts, studies on robotics, and studies related to medical education were excluded.

**Data extraction:** The included studies were graded using the CONSORT-AI checklist, comprising 43 items, by two independent graders. The results were tabulated and descriptive statistics were reported.

**Results:** We screened 1501 potential abstracts, of which 112 full-text articles were reviewed for eligibility. A total of 42 studies were included. The number of participants ranged from 22 to 2352. Only two items of the CONSORT-AI items were fully reported in all studies. Five items were not applicable in more than 85% of the studies. Nineteen per cent (8/42) of the studies did not report more than 50% (21/43) of the CONSORT-AI checklist items.



1  
2  
3  
4  
5 **Conclusions:** The quality of reporting of RCTs in AI is suboptimal. Reporting is variable in  
6 existing RCTs, therefore caution must be taken when generalising the findings of these RCTs  
7  
8 in real-world settings.  
9  
10  
11  
12  
13

## 14 **ARTICLE SUMMARY**

### 15 **Strengths and Limitations of the Study:**

- 16 • This systematic review covers RCTs of AI pertaining to all medical fields.
  - 17 • The CONSORT-AI guideline was used to assess reporting quality of some RCTs  
18 predating its publication to set a baseline for future studies.
  - 19 • A limitation of this study is the utilization of two databases.
- 20  
21  
22  
23  
24  
25  
26  
27  
28  
29  
30

## 31 **INTRODUCTION**

32  
33  
34  
35 Artificial intelligence (AI) is finding increased utility in the medical realm, with a special  
36 emphasis on deep learning. Medical applications of AI range from screening, diagnosis,  
37 prognosis, and generation of management plans. [1-5] For example, AI has been extensively  
38 studied in ophthalmology for various diseases such as diabetic retinopathy, [6] age-related  
39 macular degeneration, [7] and glaucoma. [8] However, increased hype associated with AI -  
40 without sound evidence base – may result in inappropriate clinical decisions, which can  
41 potentially be detrimental to healthcare. [9]  
42  
43  
44  
45  
46  
47  
48  
49  
50  
51  
52  
53

54 Randomised controlled trials (RCTs) are one of the highest quality of evidence used by  
55 clinicians in decision-making regarding interventions. [10] RCTs may be susceptible to  
56  
57  
58  
59  
60

1  
2  
3 various forms of biases. Adequate reporting of RCTs is vital to allow results and conclusions  
4  
5 derived from a study to be assessed critically by readers. [11,12]  
6  
7  
8  
9

10 The CONSORT (Consolidated Standards of Reporting Trials) statement was introduced in  
11  
12 1996 to establish guidelines to improve the reporting quality of clinical trials. Additionally,  
13  
14 the CONSORT statement is a useful guide that helps readers with the critical appraisal of  
15  
16 RCTs to ascertain their reliability and clinical applicability. [13] The most recent update of  
17  
18 the CONSORT statement was published in 2010, listing 25 minimum reporting requirements.  
19  
20 [14] Several extensions to CONSORT also exist, which cater to certain specific study  
21  
22 designs. [15-18]  
23  
24  
25  
26  
27

28 There has been an exponential increase in AI-based healthcare studies in recent years due to  
29  
30 rapid advances in computational power. However, the methodological rigor has not kept pace  
31  
32 with the development in technology. For example, the design and quality of reporting in these  
33  
34 studies have not always been adequate. [19,20] CONSORT-AI was recently published as an  
35  
36 extension of the CONSORT 2010 statement to evaluate RCTs involving AI. Fourteen new  
37  
38 items were added to the checklist – including 11 extensions and 3 elaborations. [21,22] These  
39  
40 items mostly relate to the AI intervention in question and are necessary to independently  
41  
42 evaluate and replicate the trial.  
43  
44  
45  
46  
47  
48

49 The aim of this study was to evaluate the quality of reporting of RCTs of AI intervention for  
50  
51 medical conditions, published from 2015 to 2020, based on CONSORT-AI guidelines. While  
52  
53 CONSORT-AI did not exist for much of this timeline, this study will serve as a baseline  
54  
55 measure of reporting quality for comparison with future studies' adherence to CONSORT-AI  
56  
57 guidelines.  
58  
59  
60

## METHODS

We performed a systematic review of RCTs of AI for medical conditions published from January 2015 to December 2021. We searched PubMed and EMBASE databases for potential studies. The PubMed search was conducted using the MeSH terms: “artificial intelligence”, “machine learning”, and “deep learning”. The term “artificial intelligence”, “deep learning” and machine learning” were searched in EMBASE. In both the databases, the search was limited to RCTs, publications in the English language, from the year 2015 to 2021, and human subjects (Appendix 1). The records were screened by two independent investigators (RS and BA) for potential inclusion. The abstracts of RCTs using artificial intelligence, deep learning, and machine learning were further evaluated for possible inclusion. Protocols, conference abstracts, studies on robotics, and post-hoc analyses of randomised controlled trials were excluded.

Full-text articles of all shortlisted abstracts were then screened for eligibility. Publications were included if AI was used as an intervention for a medical condition, if there was a comparator control group in the study and if there was evidence of randomization. In case of a disagreement, a senior reviewer assessed the full text and the disagreement was resolved with consensus. The exclusion criteria were non-randomised studies, secondary studies, post-hoc analyses, or if the intervention investigated was not AI. Additionally, if the target condition was not a medical disease or if the research pertained to medical education, the study was excluded.

1  
2  
3 The CONSORT-AI checklist of 43 items (Supplementary Table 1) was used to grade the  
4 included studies. Each item was scored fully-, partially- or not- reported. If an item was  
5 irrelevant to a particular study, it was labelled as “not applicable”. Each publication was  
6 scored by two trained graders (RS and BA) independently. Differences were discussed with  
7 the senior reviewer (MARS) to reach a consensus.  
8  
9  
10  
11  
12  
13  
14  
15  
16

17 The results were tabulated by writing all the reported items as the numerator and the total  
18 number of applicable items as the denominator. The descriptive statistics for the study  
19 population and clinical characteristics are reported. The protocol of this study was submitted  
20 to PROSPERO in February 2021. The only deviation from the submitted protocol was  
21 extension of the search until December 2021 to keep this review up-to-date.  
22  
23  
24  
25  
26  
27  
28  
29  
30  
31  
32

## 33 **RESULTS**

### 34 **Study selection**

35 The initial search identified 1501 potential records. One hundred and twelve articles were  
36 considered as potentially eligible after screening of abstracts. Following a review of full-text  
37 manuscripts, a total of 42 manuscripts were included in the systematic review (Figure 1).  
38  
39  
40  
41  
42  
43  
44  
45  
46  
47  
48

### 49 **General characteristics**

50 The included studies (Supplementary table 2) were from the years 2016 to 2021(Figure 2).  
51 The number of participants ranged from 22 to 2352. They pertained to various medical fields,  
52 including gastroenterology (n = 12) medicine (n = 6), cardiology (n = 5), psychiatry (n = 4),  
53  
54  
55  
56  
57  
58  
59  
60

ophthalmology (n = 2), endocrinology (n = 2), paediatrics (n = 2), oncology (n = 2), orthopaedics (n = 2), surgery (n = 1), radiology (n = 1), neurology (n = 1), pulmonology (n = 1) and dentistry (n = 1). Studies were from different parts of the world, including China (n = 16), United States (n = 14), Japan (n = 3), United Kingdom (n = 2), Spain (n = 2), Netherlands (n = 1), Germany (n = 1), Korea (n = 1), Denmark (n = 1) and Israel (n = 1). (Figure 3)

### Adherence to reporting standards

The median number of fully reported CONSORT-AI checklist items in the included studies was 30 (range 7-37) of a possible total of 43. Overall, only 2 (items # 1b, and 21) out of possible 43 items were fully reported in all 42 studies. Five items (items #3b, 6b, 7b, 14b, and 17b) were deemed not applicable in more than 85% of the included studies. The two least reported items were item #5iii (not reported in 36/42 studies) and item #24 (not reported in 31/42 studies). Nineteen per cent (8/42) of included studies did not report more than 50% (21/43) of the CONSORT-AI checklist items. The reporting of each item is given in Table 1.

Table 1: CONSORT-AI scores of included studies

|                           | Item       | Fully Reported | Partially Reported | Not Reported | Not Applicable |
|---------------------------|------------|----------------|--------------------|--------------|----------------|
| <b>Title and Abstract</b> | 1a, 1a(i)  | 41             | 1                  | 0            | 0              |
|                           | 1b, 1b(ii) | 42             | 0                  | 0            | 0              |
| <b>Introduction</b>       |            |                |                    |              |                |
| Background and objectives | 2a, 2a(i)  | 41             | 1                  | 0            | 0              |
|                           | 2b         | 38             | 0                  | 4            | 0              |
| <b>Methods</b>            |            |                |                    |              |                |

|                                  |      |    |   |    |    |
|----------------------------------|------|----|---|----|----|
| Trial Design                     | 3a   | 26 | 6 | 10 | 0  |
|                                  | 3b   | 6  | 0 | 0  | 36 |
| Participants                     | 4ai  | 39 | 0 | 3  | 0  |
|                                  | 4aii | 15 | 0 | 27 | 0  |
|                                  | 4b   | 40 | 0 | 2  | 0  |
| Intervention                     | 5i   | 15 | 0 | 27 | 0  |
|                                  | 5ii  | 34 | 0 | 8  | 0  |
|                                  | 5iii | 6  | 0 | 36 | 0  |
|                                  | 5iv  | 37 | 0 | 5  | 0  |
|                                  | 5v   | 41 | 0 | 1  | 0  |
|                                  | 5vi  | 31 | 0 | 11 | 0  |
| Outcomes                         | 6a   | 39 | 0 | 3  | 0  |
|                                  | 6b   | 2  | 0 | 0  | 40 |
| Sample size                      | 7a   | 30 | 0 | 11 | 1  |
|                                  | 7b   | 2  | 0 | 0  | 40 |
| Sequence generation              | 8a   | 34 | 0 | 8  | 0  |
|                                  | 8b   | 25 | 0 | 17 | 0  |
| <b>Randomisation</b>             |      |    |   |    |    |
| Allocation concealment mechanism | 9    | 24 | 0 | 18 | 0  |
| Implementation                   | 10   | 18 | 3 | 21 | 0  |
| Blinding                         | 11a  | 24 | 0 | 18 | 0  |
|                                  | 11b  | 23 | 0 | 17 | 2  |

|                          |     |    |    |    |    |
|--------------------------|-----|----|----|----|----|
| Statistical methods      | 12a | 39 | 0  | 3  | 0  |
|                          | 12b | 34 | 0  | 8  | 0  |
| <b>Results</b>           |     |    |    |    |    |
| Participant flow         | 13a | 32 | 2  | 8  | 0  |
|                          | 13b | 29 | 1  | 12 | 0  |
| Recruitment              | 14a | 38 | 0  | 4  | 0  |
|                          | 14b | 1  | 0  | 0  | 41 |
| Baseline data            | 15  | 32 | 0  | 10 | 0  |
| Numbers analyzed         | 16  | 32 | 1  | 9  | 0  |
| Outcomes and estimation  | 17a | 31 | 3  | 8  | 0  |
|                          | 17b | 1  | 0  | 0  | 41 |
| Ancillary analyses       | 18  | 33 | 0  | 9  | 0  |
| Harms                    | 19  | 4  | 11 | 27 | 0  |
| <b>Discussion</b>        |     |    |    |    |    |
| Limitations              | 20  | 36 | 0  | 6  | 0  |
| Generalizability         | 21  | 42 | 0  | 0  | 0  |
| Interpretation           | 22  | 41 | 0  | 1  | 0  |
| <b>Other information</b> |     |    |    |    |    |
| Registration             | 23  | 35 | 0  | 7  | 0  |
| Protocol                 | 24  | 11 | 0  | 31 | 0  |
| Funding                  | 25  | 10 | 20 | 12 | 0  |

### Patient and Public Involvement

No patient or public was involved in this study.

## DISCUSSION

In our review, variable reporting standards of RCTs of AI in healthcare were observed. While some items were reported adequately – for example, those relating to the abstract and introduction of the manuscript – other items particularly in the methods section had poor reporting scores.

Our results reinforce previously published findings. In a systematic review conducted by Liu et al, it was seen that sufficient reporting and external validation was done in less than one-third of the included 82 deep learning studies, thereby limiting their reliability. [23] Similarly, Nagendran et al. also found deviations from reporting standards, with less than 50% adherence to 12/29 items in the TRIPOD guidelines, and high levels of bias in AI studies. [20] Bozkurt et al. reported that demographic specifics of study populations were poorly reported in studies developing ML models from electronic health records, and external validation was omitted in 88% of the models. [24] In another systematic review of 28 articles regarding machine learning models for medical diagnosis, Yusuf et al. discovered that all studies in their systematic review failed to follow reporting guidelines. [25] Our study also revealed variable reporting of CONSORT-AI items in RCTs of AI in healthcare, suggesting there is still room in AI studies for further improving the quality of their reporting.

The CONSORT-AI checklist was developed to encourage transparent reporting of RCTs in AI. The extensions and elaborations added to the original CONSORT guideline largely emphasize the peculiarities related to AI intervention itself and its clinical application. These include details of the interventions, such as algorithm version, input and output data, how the intervention was integrated into the trial, and whether there was human and AI interaction. This information is crucial for the critical appraisal of a study and facilitates replication of



1  
2  
3 clinical trials. [23] These items had variable reporting scores in our study (items 4a to 5vi).  
4  
5 Twenty-seven out of 42 (64%) studies did not mention the version of the AI algorithm used.  
6  
7 This could confuse the reader regarding which version to apply the study findings to because  
8  
9 an AI algorithm is likely to undergo multiple updates. [21] Moreover, information regarding  
10  
11 input data was largely missed in the majority of included studies; with only 35% (15/42) of  
12  
13 the studies identifying the inclusion and exclusion criteria at the level of the input data, and a  
14  
15 mere 14% (6/42) of studies reported how poor quality or unavailable input data was handled  
16  
17 and assessed. Such details are essential, as the overall performance of any given AI  
18  
19 intervention relies on the quality of input data. Additionally, this information allows an  
20  
21 evaluator to distinguish AI platforms that may only work in ideal conditions from those  
22  
23 which can be applied to real-world settings. [26,27]  
24  
25  
26  
27  
28  
29

30  
31 On the other hand, items regarding human-AI interaction and required expertise level, as well  
32  
33 as AI output were fully reported by majority of studies (37 and 41/42, respectively). Clarity  
34  
35 about the human-AI interface is essential to ensure a standard approach and functional safety,  
36  
37 as well as to avoid ethical implications. [28,29] For example, it is essential that qualified  
38  
39 experts can interpret dynamically complex variables exhibited by AI interfaces which are  
40  
41 related to patients as well as the clinical context – only then it is possible that AI platforms  
42  
43 enable an improvement in clinicians' decision-making process. [30] It is encouraging to see  
44  
45 most authors report these items clearly.  
46  
47  
48  
49

50  
51 Interestingly, although missing out on important information regarding the details of AI  
52  
53 intervention, 42/42 of the studies were promising generalizability of their findings in the  
54  
55 clinical setting. The generalizability of AI systems may be limited; especially when used in  
56  
57  
58  
59  
60

1  
2  
3 the real-world setting outside of the environment they were developed in. [31,32] Therefore,  
4  
5 caution must be employed when evaluating such studies.  
6  
7  
8  
9

10  
11  
12 An important factor to consider about CONSORT-AI, however, is the applicability of each  
13  
14 item to clinical trials. Five items of the CONSORT-AI checklist were deemed to be not  
15  
16 applicable in the majority of studies evaluated. Three of these items referred to changes made  
17  
18 to methods and outcomes after trial commencement, and why the trial was ended (items 3b,  
19  
20 6b and 14b). These items pertain to modifications made in the protocol, which was not the  
21  
22 case in most included studies.  
23  
24  
25

26  
27  
28 Another item not applicable to most of the included studies was an explanation about any  
29  
30 interim analysis and stopping guidelines. Since AI is a relatively recent advance in  
31  
32 healthcare, harms and adverse events from AI have not been clearly defined yet. Perhaps this  
33  
34 is the reason stopping guidelines were not reported in 40 out of 42 included studies. This ties  
35  
36 closely to item 19: which requires reporting of adverse events in AI trials and a description of  
37  
38 the analysis of performance errors. AI platforms can make errors that can be difficult to  
39  
40 predict and go beyond human judgement, but may have harmful effects if employed on a  
41  
42 large scale. [31] Only 4/42 studies fully reported this item, even though it is important to  
43  
44 report information about error and outline risk mitigation strategies to decide which settings  
45  
46 and populations the AI intervention can be safely employed in. [21] These points emphasize  
47  
48 that AI clinical trials in healthcare have not integrated the concept of harm related to AI  
49  
50 intervention to determine appropriate stopping guidelines.  
51  
52  
53  
54  
55  
56  
57  
58  
59  
60

1  
2  
3 Certain general observations were made regarding the included RCTs in our review. There  
4 was a large range of sample size (22 to 2352) in the studies. This wide range suggests that a  
5 standard approach to sample size calculation is not practised in RCTs of AI. For example, the  
6 diagnostic accuracy of healthcare professionals is often set higher than that of AI while  
7 employing sample size estimation, which presumes that AI is inferior to humans. [33] It is  
8 recommended that sample size calculations are performed using a non-inferior design by  
9 setting a more suitable non-inferiority margin, of diagnostic accuracy, for example 5%. [34]  
10 Similarly, the majority of the studies took place in China, and were focused on  
11 gastroenterology, making them less representative of other fields and perhaps other parts of  
12 the world.  
13  
14  
15  
16  
17  
18  
19  
20  
21  
22  
23  
24  
25  
26  
27  
28  
29

30 There are some limitations to our review. Potential eligible studies could have been missed in  
31 the inclusion process, as only two databases were searched. The majority of the included  
32 studies were published before the CONSORT-AI checklist was widely available. Hence,  
33 some authors may not be aware of ideal information to report about an RCT of AI.  
34  
35  
36  
37  
38  
39

40 In conclusion, the standards of reporting in RCTs of AI were variable. We found certain  
41 important information regarding the AI intervention was insufficiently reported in many  
42 studies. Therefore, caution must be employed by healthcare service providers and  
43 policymakers when using these studies to inform decision-making.  
44  
45  
46  
47  
48  
49  
50  
51  
52  
53  
54  
55  
56  
57  
58  
59  
60

### **Contributorship**

The idea for the study was conceived and planned by MARS. RS and BA carried out the literature review process including screening of abstracts and review of full-text articles, while MARS acted as a senior reviewer. RS and BA independently scored the included studies using the CONSORT-AI checklist and disagreements were resolved following a combined discussion with MARS. The manuscript was prepared by RS and BA and edited by MARS. All authors reviewed and approved the final manuscript.

### **Funding Statement**

No funding

### **Competing of interests**

None declared

### **Ethics approval statement**

This study is a systematic review which did not involve human subjects. Therefore, no ethics approval was required.

### **Data sharing statement**

No additional data available.

**REFERENCES:**

1. McKinney SM, Sieniek M, Godbole V, Godwin J, Antropova N, Ashrafiyan H, et al. International evaluation of an AI system for breast cancer screening. *Nature* 2020;577(7788):89-94.
2. Esteva A, Kuprel B, Novoa RA, Ko J, Swetter SM, Blau HM, et al. Dermatologist-level classification of skin cancer with deep neural networks. *Nature* 2017;542(7639):115-8.
3. Rajpurkar P, Irvin J, Ball RL, Zhu K, Yang B, Mehta H, et al. Deep learning for chest radiograph diagnosis: A retrospective comparison of the CheXNeXt algorithm to practicing radiologists. *PLoS medicine* 2018;15(11):e1002686.
4. Tyler NS, Mosquera-Lopez CM, Wilson LM, Dodier RH, Branigan DL, Gabo VB, et al. An artificial intelligence decision support system for the management of type 1 diabetes. *Nat Metab* 2020;2(7):612-9.
5. Kim H, Goo JM, Lee KH, Kim YT, Park CM. Preoperative CT-based deep learning model for predicting disease-free survival in patients with lung adenocarcinomas. *Radiol* 2020;296(1):216-24.
6. Wong TY, Bressler NM. Artificial intelligence with deep learning technology looks into diabetic retinopathy screening. *JAMA* 2016 Dec 13;316(22):2366-7.
7. von der Emde L, Pfau M, Dysli C, Thiele S, Möller PT, Lindner M, Schmid M, Fleckenstein M, Holz FG, Schmitz-Valckenberg S. Artificial intelligence for morphology-based function prediction in neovascular age-related macular degeneration. *Sci Rep* 2019 Jul 31;9(1):1-2.

- 1  
2  
3 8. Devalla SK, Liang Z, Pham TH, Boote C, Strouthidis NG, Thiery AH, Girard MJ.  
4  
5 Glaucoma management in the era of artificial intelligence. *Br J Ophthalmol* 2020  
6  
7 Mar 1;104(3):301-11.  
8  
9
- 10 9. Navarro CL, Damen JA, Takada T, Nijman SW, Dhiman P, Ma J, Collins GS,  
11  
12 Bajpai R, Riley RD, Moons KG, Hooft L. Risk of bias in studies on prediction  
13  
14 models developed using supervised machine learning techniques: systematic  
15  
16 review. *Br Med J* 2021 Oct 20;375.  
17  
18
- 19 10. Altman DG. Better reporting of randomised controlled trials: the CONSORT  
20  
21 statement. *British Medical Journal Publishing Group*; 1996.  
22  
23
- 24 11. Jüni P, Altman DG, Egger M. Assessing the quality of controlled clinical trials. *Br*  
25  
26 *Med J* 2001;323(7303):42-6.  
27  
28
- 29 12. Schulz KF, Chalmers I, Hayes RJ, Altman DG. Empirical evidence of bias:  
30  
31 dimensions of methodological quality associated with estimates of treatment  
32  
33 effects in controlled trials. *JAMA* 1995;273(5):408-12.  
34  
35
- 36 13. Begg C, Cho M, Eastwood S, Horton R, Moher D, Olkin I, et al. Improving the  
37  
38 quality of reporting of randomized controlled trials: the CONSORT statement.  
39  
40 *JAMA* 1996;276(8):637-9.  
41  
42
- 43 14. Schulz KF, Altman DG, Moher D. CONSORT 2010 statement: updated  
44  
45 guidelines for reporting parallel group randomised trials. *Trials* 2010;11(1):1-8.  
46  
47
- 48 15. Boutron I, Altman DG, Moher D, Schulz KF, Ravaud P. CONSORT statement for  
49  
50 randomized trials of nonpharmacologic treatments: a 2017 update and a  
51  
52 CONSORT extension for nonpharmacologic trial abstracts. *Ann Int Med*  
53  
54 2017;167(1):40-7.  
55  
56  
57  
58  
59  
60

- 1  
2  
3 16. Hopewell S, Clarke M, Moher D, Wager E, Middleton P, Altman DG, et al.  
4  
5 CONSORT for reporting randomised trials in journal and conference abstracts.  
6  
7 *The Lancet* 2008;371(9609):281-3.  
8  
9
- 10 17. Gagnier JJ, Boon H, Rochon P, Moher D, Barnes J, Bombardier C. Reporting  
11  
12 randomized, controlled trials of herbal interventions: an elaborated CONSORT  
13  
14 statement. *Ann Int Med* 2006;144(5):364-7.  
15  
16
- 17 18. Calvert M, Blazeby J, Altman DG, Revicki DA, Moher D, Brundage MD, et al.  
18  
19 Reporting of patient-reported outcomes in randomized trials: the CONSORT PRO  
20  
21 extension. *JAMA* 2013;309(8):814-22.  
22  
23
- 24 19. Gregory J, Welliver S, Chong J. Top 10 reviewer critiques of radiology artificial  
25  
26 intelligence (AI) articles: qualitative thematic analysis of reviewer critiques of  
27  
28 machine learning/deep learning manuscripts submitted to JMRI. *J Magn Reson*  
29  
30 *Imaging* 2020;52(1):248-54.  
31  
32
- 33 20. Nagendran M, Chen Y, Lovejoy CA, Gordon AC, Komorowski M, Harvey H, et  
34  
35 al. Artificial intelligence versus clinicians: systematic review of design, reporting  
36  
37 standards, and claims of deep learning studies. *Br Med J* 2020;368.  
38  
39
- 40 21. Liu X, Rivera SC, Faes L, Di Ruffano LF, Yau C, Keane PA, et al. Reporting  
41  
42 guidelines for clinical trials evaluating artificial intelligence interventions are  
43  
44 needed. *Nat Med* 2019;25:1467-8.  
45  
46
- 47 22. Liu X, Faes L, Calvert MJ, Denniston AK. Extension of the CONSORT and  
48  
49 SPIRIT statements. *The Lancet* 2019;394(10205):1225.  
50  
51
- 52 23. Liu X, Faes L, Kale AU, et al. A comparison of deep learning performance against  
53  
54 health-care professionals in detecting diseases from medical imaging: a systematic  
55  
56 review and meta-analysis. *Lancet Digit Health* 2019;1(6):e271-e97  
57  
58  
59  
60

- 1  
2  
3 24. Bozkurt S, Cahan EM, Seneviratne MG, et al. Reporting of demographic data and  
4 representativeness in machine learning models using electronic health records. *J*  
5  
6  
7  
8  
9  
10  
11 25. Yusuf M, Atal I, Li J, et al. Reporting quality of studies using machine learning  
12  
13  
14  
15  
16  
17 26. Sabottke CF, Spieler BM. The effect of image resolution on deep learning in  
18  
19  
20  
21  
22 27. Ibrahim H, Liu X, Rivera SC, Moher D, Chan AW, Sydes MR, Calvert MJ,  
23  
24  
25  
26  
27  
28  
29  
30  
31 28. Wiens J, Saria S, Sendak M, Ghassemi M, Liu VX, Doshi-Velez F, Jung K, Heller  
32  
33  
34  
35  
36  
37  
38 29. Habli I, Lawton T, Porter Z. Artificial intelligence in health care: accountability  
39  
40  
41  
42  
43 30. Shortliffe EH, Sepúlveda MJ. Clinical decision support in the era of artificial  
44  
45  
46  
47  
48 31. Kelly CJ, Karthikesalingam A, Suleyman M, Corrado G, King D. Key challenges  
49  
50  
51  
52  
53  
54 32. Pooch EH, Ballester P, Barros RC. Can We Trust Deep Learning Based  
55  
56  
57  
58  
59  
60



1  
2  
3 International Workshop on Thoracic Image Analysis 2020 Oct 8 (pp. 74-83).  
4  
5 Springer, Cham.  
6

- 7  
8 33. Lin H, Li R, Liu Z, Chen J, Yang Y, Chen H, et al. Diagnostic efficacy and  
9  
10 therapeutic decision-making capacity of an artificial intelligence platform for  
11  
12 childhood cataracts in eye clinics: a multicentre randomized controlled trial.  
13  
14 *EClinicalMedicine* 2019; 9: 52–9.  
15  
16 34. Zhou Q, Cao YH, Chen ZH. Optimizing the study design of clinical trials to  
17  
18 identify the efficacy of artificial intelligence tools in clinical practices.  
19  
20 *EClinicalMedicine* 2019 Nov 1;16:10-1.  
21  
22  
23  
24  
25  
26  
27  
28  
29  
30

### 31 **FIGURE LEGENDS:**

32  
33  
34  
35 Figure 1: PRISMA flowchart  
36  
37

38  
39  
40 Figure 2: Year-wise distribution of RCTs in AI  
41  
42

43  
44  
45 Figure 3: Percentage of AI RCTs in different countries and specialties  
46  
47  
48  
49  
50  
51  
52  
53  
54  
55  
56  
57  
58  
59  
60

1  
2  
3  
4  
5  
6  
7  
8  
9  
10  
11  
12  
13  
14  
15  
16  
17  
18  
19  
20  
21  
22  
23  
24  
25  
26  
27  
28  
29  
30  
31  
32  
33  
34  
35  
36  
37  
38  
39  
40  
41  
42  
43  
44  
45  
46  
47  
48  
49  
50  
51  
52  
53  
54  
55  
56  
57  
58  
59  
60

For peer review only

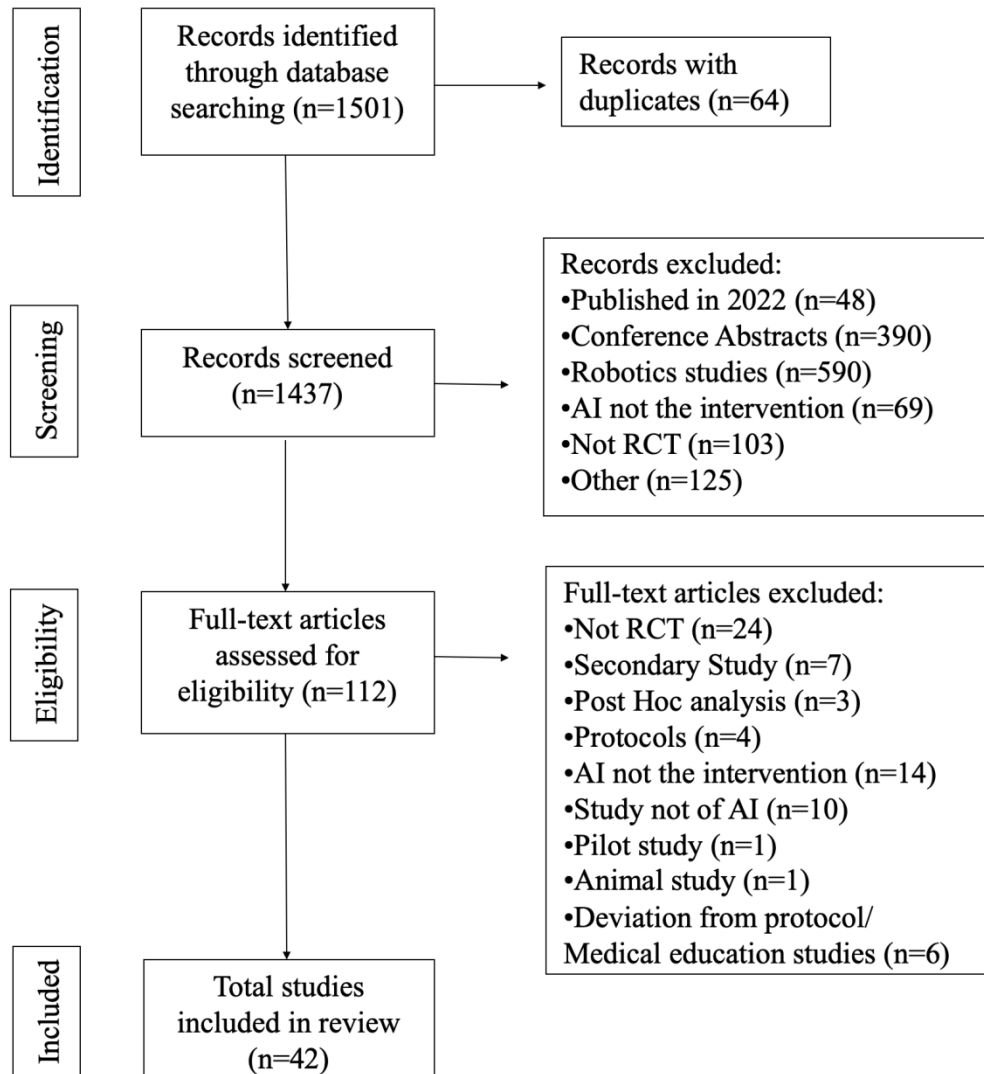

PRISMA flow chart

293x349mm (144 x 144 DPI)

1  
2  
3  
4  
5  
6  
7  
8  
9  
10  
11  
12  
13  
14  
15  
16  
17  
18  
19  
20  
21  
22  
23  
24  
25  
26  
27  
28  
29  
30  
31  
32  
33  
34  
35  
36  
37  
38  
39  
40  
41  
42  
43  
44  
45  
46  
47  
48  
49  
50  
51  
52  
53  
54  
55  
56  
57  
58  
59  
60

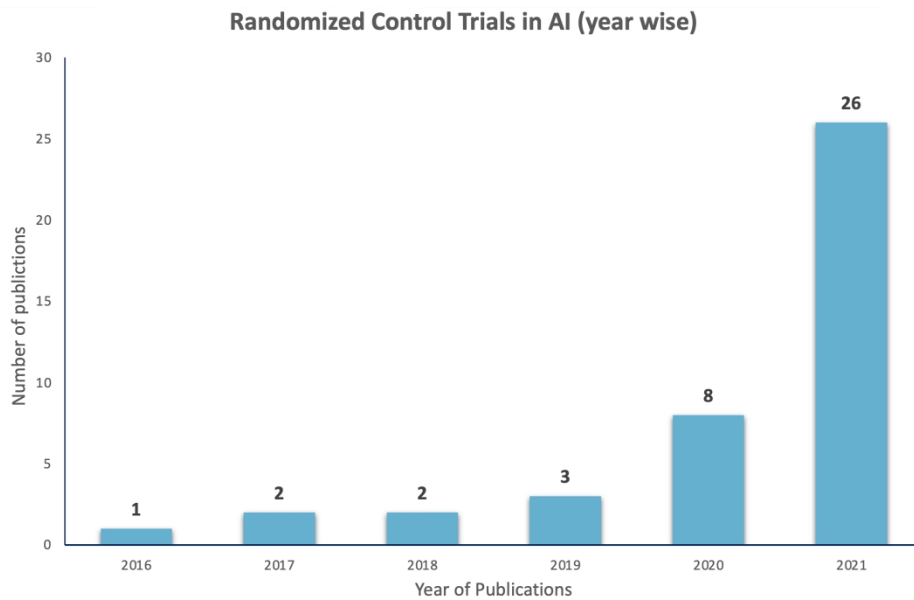

Year-wise distribution of RCTs in AI

403x244mm (144 x 144 DPI)

1  
2  
3  
4  
5  
6  
7  
8  
9  
10  
11  
12  
13  
14  
15  
16  
17  
18  
19  
20  
21  
22  
23  
24  
25  
26  
27  
28  
29  
30  
31  
32  
33  
34  
35  
36  
37  
38  
39  
40  
41  
42  
43  
44  
45  
46  
47  
48  
49  
50  
51  
52  
53  
54  
55  
56  
57  
58  
59  
60

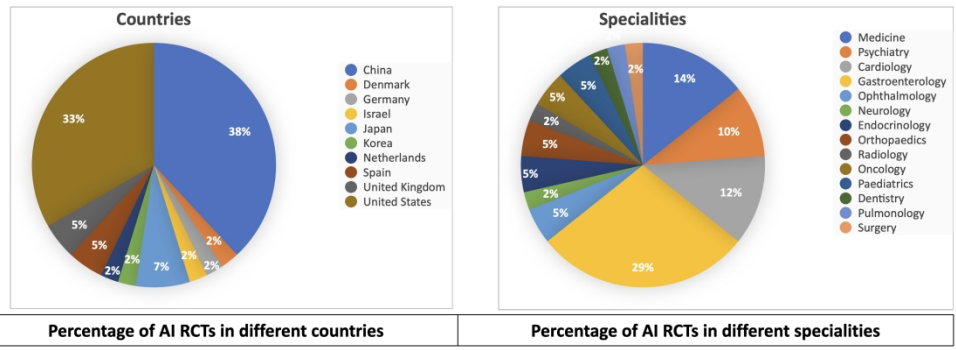

Percentage of AI RCTs in different countries and specialities

608x295mm (144 x 144 DPI)

Supplementary table 1: CONSORT-AI checklist\*\*

| Section                   | Item | CONSORT 2010 item                                                                                                       | CONSORT-AI item               | Addressed on page no.*                                                                                                                                |
|---------------------------|------|-------------------------------------------------------------------------------------------------------------------------|-------------------------------|-------------------------------------------------------------------------------------------------------------------------------------------------------|
| <b>Title and abstract</b> |      |                                                                                                                         |                               |                                                                                                                                                       |
| Title and abstract        | 1a   | Identification as a randomized trial in the title                                                                       | CONSORT-AI a,b<br>Elaboration | (i) Indicate that the intervention involves artificial intelligence/machine learning in the title and/or abstract and specify the type of model.      |
|                           | 1b   | Structured summary of trial design, methods, results, and conclusions (for specific guidance see CONSORT for abstracts) |                               | (ii) State the intended use of the AI intervention within the trial in the title and/or abstract.                                                     |
| <b>Introduction</b>       |      |                                                                                                                         |                               |                                                                                                                                                       |
| Background and objectives | 2a   | Scientific background and explanation of rationale                                                                      | CONSORT-AI a (i)<br>Extension | Explain the intended use of the AI intervention in the context of the clinical pathway, including its purpose and its intended users (e.g. healthcare |

|                |    |                                                                                                    |                              |                                                                                                                       |  |
|----------------|----|----------------------------------------------------------------------------------------------------|------------------------------|-----------------------------------------------------------------------------------------------------------------------|--|
|                |    |                                                                                                    |                              | professionals, patients, public).                                                                                     |  |
|                | 2b | Specific objectives or hypotheses                                                                  |                              |                                                                                                                       |  |
| <b>Methods</b> |    |                                                                                                    |                              |                                                                                                                       |  |
| Trial design   | 3a | Description of trial design (such as parallel, factorial) including allocation ratio               |                              |                                                                                                                       |  |
|                | 3b | Important changes to methods after trial commencement (such as eligibility criteria), with reasons |                              |                                                                                                                       |  |
| Participants   | 4a | Eligibility criteria for participants                                                              | CONSORT-AI a (i) Elaboration | State the inclusion and exclusion criteria at the level of participants.                                              |  |
|                |    |                                                                                                    | CONSORT-AI a (ii) Extension  | State the inclusion and exclusion criteria at the level of the input data.                                            |  |
|                | 4b | Settings and locations where the data were collected                                               | CONSORT-AI b Extension       | Describe how the AI intervention was integrated into the trial setting, including any onsite or on site requirements. |  |

|               |    |                                                                                                                                       |                            |                                                                                                                                      |  |
|---------------|----|---------------------------------------------------------------------------------------------------------------------------------------|----------------------------|--------------------------------------------------------------------------------------------------------------------------------------|--|
| Interventions | 5  | The interventions for each group with sufficient details to allow replication, including how and when they were actually administered | CONSORT-AI (i) Extension   | State which version of the AI algorithm was used.                                                                                    |  |
|               |    |                                                                                                                                       | CONSORT-AI (ii) Extension  | Describe how the input data were acquired and selected for the AI intervention.                                                      |  |
|               |    |                                                                                                                                       | CONSORT-AI (iii) Extension | Describe how poor quality or unavailable input data were assessed and handled.                                                       |  |
|               |    |                                                                                                                                       | CONSORT-AI (iv) Extension. | Specify whether there was human-AI interaction in the handling of the input data, and what level of expertise was required of users. |  |
|               |    |                                                                                                                                       | CONSORT-AI (v) Extension   | Specify the output of the AI intervention                                                                                            |  |
|               |    |                                                                                                                                       | CONSORT-AI (vi) Extension  | Explain how the AI intervention's outputs contributed to decision-making or other elements of clinical practice.                     |  |
| Outcomes      | 6a | Completely defined pre-specified primary and secondary outcome                                                                        |                            |                                                                                                                                      |  |



|                                  |    |                                                                                                                                                  |  |  |  |
|----------------------------------|----|--------------------------------------------------------------------------------------------------------------------------------------------------|--|--|--|
|                                  |    | measures, including how and when they were assessed                                                                                              |  |  |  |
|                                  | 6b | Any changes to trial outcomes after the trial commenced, with reasons                                                                            |  |  |  |
| Sample size                      | 7a | How sample size was determined                                                                                                                   |  |  |  |
|                                  | 7b | When applicable, explanation of any interim analyses and stopping guidelines                                                                     |  |  |  |
| Sequence generation              | 8a | Method used to generate the random allocation sequence                                                                                           |  |  |  |
|                                  | 8b | Type of randomization; details of any restriction (such as blocking and block size)                                                              |  |  |  |
| <b>Randomization</b>             |    |                                                                                                                                                  |  |  |  |
| Allocation concealment mechanism | 9  | Mechanism used to implement the random allocation sequence (such as sequentially numbered containers), describing any steps taken to conceal the |  |  |  |

|                     |     |                                                                                                                                          |  |  |  |
|---------------------|-----|------------------------------------------------------------------------------------------------------------------------------------------|--|--|--|
|                     |     | sequence until interventions were assigned                                                                                               |  |  |  |
| Implementation      | 10  | Who generated the random allocation sequence, who enrolled participants, and who assigned participants to interventions                  |  |  |  |
| Blinding            | 11a | If done, who was blinded after assignment to interventions (for example, participants, care providers, those assessing outcomes) and how |  |  |  |
|                     | 11b | If relevant, description of the similarity of interventions                                                                              |  |  |  |
| Statistical methods | 12a | Statistical methods used to compare groups for primary and secondary outcomes                                                            |  |  |  |
|                     | 12b | Methods for additional analyses, such as subgroup analyses and adjusted analyses                                                         |  |  |  |
| <b>Results</b>      |     |                                                                                                                                          |  |  |  |

|                                                         |     |                                                                                                                                                |  |  |  |
|---------------------------------------------------------|-----|------------------------------------------------------------------------------------------------------------------------------------------------|--|--|--|
| Participant flow<br>(a diagram is strongly recommended) | 13a | For each group, the numbers of participants who were randomly assigned, received intended treatment, and were analyzed for the primary outcome |  |  |  |
|                                                         | 13b | For each group, losses and exclusions after randomization, together with reasons                                                               |  |  |  |
| Recruitment                                             | 14a | Dates defining the periods of recruitment and follow-up                                                                                        |  |  |  |
|                                                         | 14b | Why the trial ended or was stopped                                                                                                             |  |  |  |
| Baseline data                                           | 15  | A table showing baseline demographic and clinical characteristics for each group                                                               |  |  |  |
| Numbers analyzed                                        | 16  | For each group, number of participants (denominator) included in each analysis and whether the analysis was by original assigned groups        |  |  |  |
| Outcomes and estimation                                 | 17a | For each primary and secondary outcome,                                                                                                        |  |  |  |

|                    |     |                                                                                                                                           |                      |                                                                                                                                                                    |  |
|--------------------|-----|-------------------------------------------------------------------------------------------------------------------------------------------|----------------------|--------------------------------------------------------------------------------------------------------------------------------------------------------------------|--|
|                    |     | results for each group, and the estimated effect size and its precision (such as % confidence interval)                                   |                      |                                                                                                                                                                    |  |
|                    | 17b | For binary outcomes, presentation of both absolute and relative effect sizes is recommended                                               |                      |                                                                                                                                                                    |  |
| Ancillary analyses | 18  | Results of any other analyses performed, including subgroup analyses and adjusted analyses, distinguishing pre-specified from exploratory |                      |                                                                                                                                                                    |  |
| Harms              | 19  | All important harms or unintended effects in each group (for specific guidance see CONSORT for harms)                                     | CONSORT-AI Extension | Describe results of any analysis of performance errors and how errors were identified, where applicable. If no such analysis was planned or done, justify why not. |  |
| <b>Discussion</b>  |     |                                                                                                                                           |                      |                                                                                                                                                                    |  |
| Limitations        | 20  | Trial limitations, addressing sources of potential bias,                                                                                  |                      |                                                                                                                                                                    |  |

|                          |    |                                                                                                               |                       |                                                                                                                            |  |
|--------------------------|----|---------------------------------------------------------------------------------------------------------------|-----------------------|----------------------------------------------------------------------------------------------------------------------------|--|
|                          |    | imprecision, and, if relevant, multiplicity of analyses                                                       |                       |                                                                                                                            |  |
| Generalizability         | 21 | Generalizability (external validity, applicability) of the trial findings                                     |                       |                                                                                                                            |  |
| Interpretation           | 22 | Interpretation consistent with results, balancing benefits and harms, and considering other relevant evidence |                       |                                                                                                                            |  |
| <b>Other information</b> |    |                                                                                                               |                       |                                                                                                                            |  |
| Registration             | 23 | Registration number and name of trial registry                                                                |                       |                                                                                                                            |  |
| Protocol                 | 24 | Where the full trial protocol can be accessed, if available                                                   |                       |                                                                                                                            |  |
| Funding                  | 25 | Sources of funding and other support (such as supply of drugs), role of funders                               | CONSORT-AI Extension. | State whether and how the AI intervention and/or its code can be accessed, including any restrictions to access or re-use. |  |
|                          |    |                                                                                                               |                       |                                                                                                                            |  |

1  
2  
3 \*Indicates page numbers to be completed by authors during protocol development  
4

5 \*\* 22. Liu X, Faes L, Calvert MJ, Denniston AK. Extension of the CONSORT and SPIRIT statements. The  
6 Lancet 2019;394(10205):1225.  
7  
8  
9

10  
11  
12  
13  
14  
15  
16  
17  
18  
19  
20  
21  
22  
23  
24  
25  
26  
27  
28  
29  
30  
31  
32  
33  
34  
35  
36  
37  
38  
39  
40  
41  
42  
43  
44  
45  
46  
47  
48  
49  
50  
51  
52  
53  
54  
55  
56  
57  
58  
59  
60

For peer review only

1  
2  
3  
4  
5  
6  
7  
8  
9  
10  
11  
12  
13  
14  
15  
16  
17  
18  
19  
20  
21  
22  
23  
24  
25  
26  
27  
28  
29  
30  
31  
32  
33  
34  
35  
36  
37  
38  
39  
40  
41  
42  
43  
44  
45  
46

Supplementary table 2: Included studies

| No. | Authors               | Year | Title                                                                                                                                          | Country          | Specialty  | Disease studied      | Sample size | Intervention                                        | Control                                                                | Blinding                   | Primary outcome             | Trial registration |
|-----|-----------------------|------|------------------------------------------------------------------------------------------------------------------------------------------------|------------------|------------|----------------------|-------------|-----------------------------------------------------|------------------------------------------------------------------------|----------------------------|-----------------------------|--------------------|
| 1.  | Sadasiva<br>m, et al. | 2016 | Impact of a<br>Collective<br>Intelligence<br>Tailored Messaging<br>System on Smoking<br>Cessation: The<br>Perspect<br>Randomized<br>Experiment | United<br>States | Medicine   | Smoking<br>addiction | 120         | AI<br>recommended<br>motivational<br>messages       | Standard<br>tailored<br>messages                                       | Single<br>(study<br>staff) | Influence<br>of<br>messages | NR                 |
| 2.  | Morrison<br>, et al.  | 2017 | The Effect of<br>Timing and<br>Frequency of Push<br>Notifications on<br>Usage of a<br>Smartphone- Based<br>Stress Management                   | United<br>States | Psychiatry | Stress               | 77          | Smartphone-<br>based stress<br>management<br>system | Daily/oc<br>casional<br>notificati<br>ons<br>within<br>pre-<br>defined | Not stated                 | Notificatio<br>n response   | ISRCTN6717<br>7737 |

|    |                  |      |                                                                                                         |                |                  |                 |      |                                                      |                      |            |                        |                     |
|----|------------------|------|---------------------------------------------------------------------------------------------------------|----------------|------------------|-----------------|------|------------------------------------------------------|----------------------|------------|------------------------|---------------------|
|    |                  |      | Intervention: An Exploratory Trial                                                                      |                |                  |                 |      |                                                      | time frames          |            |                        |                     |
| 3. | Labovitz, et al. | 2017 | Using Artificial Intelligence to Reduce the Risk of Nonadherence in Patients on Anticoagulation Therapy | United States  | Cardiology       | Ischemic stroke | 28   | AI system monitoring                                 | No daily monitoring  | Not stated | Adherence to therapy   | NCT02599259         |
| 4. | Rostill, et al.  | 2018 | Technology integrated health management for dementia                                                    | United Kingdom | Psychiatry       | Dementia        | 408  | Technology-integrated health management for dementia | No TIHM              | Not stated | Alerts                 | NR                  |
| 5. | Wang, et al      | 2018 | Real-time automatic detection system increases colonoscopic polyp and adenoma                           | China          | Gastroenterology | Adenoma         | 1058 | AI-aided colonoscopy                                 | Standard colonoscopy | None       | Adenoma detection rate | ChiCTR-DDD-17012221 |



1  
2  
3  
4  
5  
6  
7  
8  
9  
10  
11  
12  
13  
14  
15  
16  
17  
18  
19  
20  
21  
22  
23  
24  
25  
26  
27  
28  
29  
30  
31  
32  
33  
34  
35  
36  
37  
38  
39  
40  
41  
42  
43  
44  
45  
46

|    |             |      |                                                                                                                                                                                       |       |               |          |     |                                |               |        |                                              |             |
|----|-------------|------|---------------------------------------------------------------------------------------------------------------------------------------------------------------------------------------|-------|---------------|----------|-----|--------------------------------|---------------|--------|----------------------------------------------|-------------|
|    |             |      | detection rates: a prospective randomised controlled study                                                                                                                            |       |               |          |     |                                |               |        |                                              |             |
| 6. | Lin, et al. | 2019 | Diagnostic Efficacy and Therapeutic Decision-making Capacity of an Artificial Intelligence Platform for Childhood Cataracts in Eye Clinics: A Multicentre Randomized Controlled Trial | China | Ophthalmology | Cataract | 350 | AI-assisted cataract detection | Normal clinic | Double | Diagnostic accuracy for congenital cataracts | NCT03240848 |

|    |              |      |                                                                                                                                           |               |                  |                  |     |                                      |                                      |        |                                                     |                  |
|----|--------------|------|-------------------------------------------------------------------------------------------------------------------------------------------|---------------|------------------|------------------|-----|--------------------------------------|--------------------------------------|--------|-----------------------------------------------------|------------------|
| 7. | Voss, et al. | 2019 | Effect of Wearable Digital Intervention for Improving Socialization in Children With Autism Spectrum Disorder A Randomized Clinical Trial | United States | Psychiatry       | Autism           | 474 | AI-driven behavioral intervention    | Applied behavior analysis therapy    | Single | SRS-II, EGG, VABS-II, NEPSY-II socialization scores | NCT03569176      |
| 8. | Wu, et al.   | 2019 | Randomised controlled trial of WISENSE, a real-time quality improving system for monitoring blind spots                                   | China         | Gastroenterology | Upper GI lesions | 324 | AI-aided esophagogastrroduodenoscopy | Standard esophagogastrroduodenoscopy | Single | Blind spot rate                                     | ChiCTR1800014809 |

1  
2  
3  
4  
5  
6  
7  
8  
9  
10  
11  
12  
13  
14  
15  
16  
17  
18  
19  
20  
21  
22  
23  
24  
25  
26  
27  
28  
29  
30  
31  
32  
33  
34  
35  
36  
37  
38  
39  
40  
41  
42  
43  
44  
45  
46

|     |                 |      |                                                                                                                                                    |               |                   |               |      |                        |                             |        |                                     |                  |
|-----|-----------------|------|----------------------------------------------------------------------------------------------------------------------------------------------------|---------------|-------------------|---------------|------|------------------------|-----------------------------|--------|-------------------------------------|------------------|
|     |                 |      | during<br>esophagogastroduo<br>denoscopy                                                                                                           |               |                   |               |      |                        |                             |        |                                     |                  |
| 9.  | Wang, et al.    | 2020 | Effect of a deep-learning computer-aided detection system on adenoma detection during colonoscopy (CADE-DB trial): a double-blind randomised study | China         | Gastroente rology | Adenom a      | 1046 | AI-aided colonoscopy   | Sham                        | Double | Adenoma detection rate              | ChiCTR1800017675 |
| 10. | Persell, et al. | 2020 | Effect of Home Blood Pressure Monitoring via a Smartphone Hypertension Coaching                                                                    | United States | Medicine          | Hyperten sion | 333  | AI-driven coaching app | Blood pressure tracking app | None   | Systolic blood pressure at 6 months | NCT03288142      |

|     |                       |      |                                                                                                                                                                                          |                 |            |                                        |    |                                                                           |                  |      |                                                                          |                 |
|-----|-----------------------|------|------------------------------------------------------------------------------------------------------------------------------------------------------------------------------------------|-----------------|------------|----------------------------------------|----|---------------------------------------------------------------------------|------------------|------|--------------------------------------------------------------------------|-----------------|
|     |                       |      | Application or<br>Tracking<br>Application<br>on Adults With<br>Uncontrolled<br>Hypertension<br>A Randomized<br>Clinical Trial                                                            |                 |            |                                        |    |                                                                           |                  |      |                                                                          |                 |
| 11. | Wijnberg<br>e, et al. | 2020 | Effect of a Machine<br>Learning-Derived<br>Early Warning<br>System<br>for Intraoperative<br>Hypotension vs<br>Standard Care on<br>Depth and Duration<br>of Intraoperative<br>Hypotension | Netherl<br>ands | Cardiology | Intra-<br>operative<br>hypotens<br>ion | 68 | AI-driven<br>early warning<br>system for<br>intraoperative<br>hypotension | Standard<br>care | None | Time-<br>weighted<br>average of<br>intraoperat<br>ive<br>hypotensio<br>n | NCT0337634<br>7 |

1  
2  
3  
4  
5  
6  
7  
8  
9  
10  
11  
12  
13  
14  
15  
16  
17  
18  
19  
20  
21  
22  
23  
24  
25  
26  
27  
28  
29  
30  
31  
32  
33  
34  
35  
36  
37  
38  
39  
40  
41  
42  
43  
44  
45  
46

|     |               |      |                                                                                                            |                |               |                   |     |                                       |                       |        |                                                                       |             |
|-----|---------------|------|------------------------------------------------------------------------------------------------------------|----------------|---------------|-------------------|-----|---------------------------------------|-----------------------|--------|-----------------------------------------------------------------------|-------------|
|     |               |      | During Elective<br>Noncardiac Surgery<br>The HYPE<br>Randomized<br>Clinical Trial                          |                |               |                   |     |                                       |                       |        |                                                                       |             |
| 12. | Pavel, et al. | 2020 | A machine-learning algorithm for neonatal seizure recognition: a multicentre, randomised, controlled trial | United Kingdom | Neurology     | Neonatal seizures | 264 | Automated seizure detection algorithm | Conventional EEG      | Single | Diagnostic accuracy of healthcare professionals with aid of algorithm | NCT02431780 |
| 13. | Nimri, et al. | 2020 | Insulin dose optimization using an automated artificial intelligence-based decision support                | Israel         | Endocrinology | Diabetes          | 108 | AI-based decision support system      | Physician guided care | Single | Time of glucose level within target range                             | NCT03003806 |

|     |              |      |                                                                                                                                  |       |                  |         |     |                      |                        |        |                        |                  |
|-----|--------------|------|----------------------------------------------------------------------------------------------------------------------------------|-------|------------------|---------|-----|----------------------|------------------------|--------|------------------------|------------------|
|     |              |      | system in youths with type 1 diabetes                                                                                            |       |                  |         |     |                      |                        |        |                        |                  |
| 14. | Liu, et al.  | 2020 | The single-monitor trial: an embedded CAde system increased adenoma detection during colonoscopy: a prospective randomized study | China | Gastroenterology | Adenoma | 790 | AI-aided colonoscopy | Routine colonoscopy    | None   | Adenoma detection rate | ChiCTR1800018058 |
| 15. | Gong, et al. | 2020 | Detection of colorectal adenomas with a real-time computer-aided system (ENDOANGEL): a randomised                                | China | Gastroenterology | Adenoma | 704 | AI-aided colonoscopy | Unassisted colonoscopy | Single | Adenoma detection rate | ChiCTR1900021984 |

1  
2  
3  
4  
5  
6  
7  
8  
9  
10  
11  
12  
13  
14  
15  
16  
17  
18  
19  
20  
21  
22  
23  
24  
25  
26  
27  
28  
29  
30  
31  
32  
33  
34  
35  
36  
37  
38  
39  
40  
41  
42  
43  
44  
45  
46

|     |              |      |                                                                                                                               |       |                  |                             |     |                            |                     |      |                      |                         |
|-----|--------------|------|-------------------------------------------------------------------------------------------------------------------------------|-------|------------------|-----------------------------|-----|----------------------------|---------------------|------|----------------------|-------------------------|
|     |              |      | controlled study                                                                                                              |       |                  |                             |     |                            |                     |      |                      |                         |
| 16. | Luo, et al.  | 2020 | Artificial Intelligence-Assisted Colonoscopy for Detection of Colon Polyps: a Prospective, Randomized Cohort Study            | China | Gastroenterology | Polyps                      | 150 | AI-aided colonoscopy       | Unaided colonoscopy | None | Polyp detection rate | NCT0471262<br>65        |
| 17. | Anan, et al. | 2021 | Effects of an Artificial Intelligence-Assisted Health Program on Workers With Neck/Shoulder Pain/Stiffness and Low Back Pain: | Japan | Orthopaedics     | Neck/shoulder and back pain | 94  | AI-assisted health program | Usual care routine  | None | Pain level           | (UMIN-CTR)<br>000033894 |

|     |                  |      |                                                                                                                                                                |         |            |                |     |                           |                          |        |                                      |             |
|-----|------------------|------|----------------------------------------------------------------------------------------------------------------------------------------------------------------|---------|------------|----------------|-----|---------------------------|--------------------------|--------|--------------------------------------|-------------|
|     |                  |      | Randomized<br>Controlled Trial                                                                                                                                 |         |            |                |     |                           |                          |        |                                      |             |
| 18. | Blomberg, et al. | 2021 | Effect of Machine Learning on Dispatcher Recognition of Out-of-Hospital Cardiac Arrest During Calls to Emergency Medical Services: A Randomized Clinical Trial | Denmark | Cardiology | Cardiac arrest | 654 | AI-led alerts             | Normal protocol          | Double | Recognition of cardiac arrest        | NCT04219306 |
| 19. | Chen, et al.     | 2021 | The Role of Deep Learning-Based Echocardiography in the Diagnosis and Evaluation of the Effects of Routine Anti-Heart-                                         | China   | Cardiology | Heart failure  | 80  | AI-based echocardiography | Routine echocardiography | None   | Mortality and rehospitalization rate | NR          |



1  
2  
3  
4  
5  
6  
7  
8  
9  
10  
11  
12  
13  
14  
15  
16  
17  
18  
19  
20  
21  
22  
23  
24  
25  
26  
27  
28  
29  
30  
31  
32  
33  
34  
35  
36  
37  
38  
39  
40  
41  
42  
43  
44  
45  
46

|     |                |      |                                                                                                   |               |           |                            |      |                                    |                       |        |                                                   |               |
|-----|----------------|------|---------------------------------------------------------------------------------------------------|---------------|-----------|----------------------------|------|------------------------------------|-----------------------|--------|---------------------------------------------------|---------------|
|     |                |      | Failure Western Medicines in Elderly Patients with Acute Left Heart Failure                       |               |           |                            |      |                                    |                       |        |                                                   |               |
| 20. | Eng, et al.    | 2021 | Artificial Intelligence Algorithm Improves Radiologist Performance in Skeletal Age Assessment     | United States | Radiology | Skeletal age               | 1903 | AI diagnostic aid                  | Without aid           | None   | Mean absolute difference between the skeletal age | NCT03530098   |
| 21. | Harada, et al. | 2021 | Efficacy of artificial-intelligence-driven differential-diagnosis list on the diagnostic accuracy | Japan         | Medicine  | Various medical conditions | 22   | AI-assisted differential diagnosis | Without AI assistance | Single | Diagnostic accuracy                               | UMIN000042881 |

|     |                   |      |                                                                                                                          |               |              |                        |     |                                 |                      |        |                          |             |
|-----|-------------------|------|--------------------------------------------------------------------------------------------------------------------------|---------------|--------------|------------------------|-----|---------------------------------|----------------------|--------|--------------------------|-------------|
|     |                   |      | of physicians: An open-label randomized controlled study                                                                 |               |              |                        |     |                                 |                      |        |                          |             |
| 22. | Hassoon, et al.   | 2021 | Randomized trial of two artificial intelligence coaching interventions to increase physical activity in cancer survivors | United States | Oncology     | Different cancer types | 42  | AI coaching                     | Written information  | Single | Change in steps per day  | NCT03212079 |
| 23. | Jayakumar, et al. | 2021 | Comparison of an Artificial Intelligence-Enabled Patient Decision Aid vs Educational Material on                         | United States | Orthopaedics | Osteoarthritis         | 129 | AI-enabled patient decision aid | Educational material | None   | Knee OA Decision Quality | NCT03956004 |

1  
2  
3  
4  
5  
6  
7  
8  
9  
10  
11  
12  
13  
14  
15  
16  
17  
18  
19  
20  
21  
22  
23  
24  
25  
26  
27  
28  
29  
30  
31  
32  
33  
34  
35  
36  
37  
38  
39  
40  
41  
42  
43  
44  
45  
46

|     |               |      |                                                                                                                                                       |       |                  |         |     |                      |                     |      |                   |                |
|-----|---------------|------|-------------------------------------------------------------------------------------------------------------------------------------------------------|-------|------------------|---------|-----|----------------------|---------------------|------|-------------------|----------------|
|     |               |      | Decision Quality, Shared Decision-Making, Patient Experience, and Functional Outcomes in Adults with Knee Osteoarthritis: A Randomized Clinical Trial |       |                  |         |     |                      |                     |      |                   |                |
| 24. | Kamba, et al. | 2021 | Reducing adenoma miss rate of colonoscopy assisted by artificial intelligence: a multicenter randomized controlled trial                              | Japan | Gastroenterology | Adenoma | 358 | AI-aided colonoscopy | Unaided colonoscopy | None | Adenoma miss rate | jRCTs032190061 |

|     |                |      |                                                                                                                                                                                       |               |            |                                          |    |                                         |                        |        |                             |                |
|-----|----------------|------|---------------------------------------------------------------------------------------------------------------------------------------------------------------------------------------|---------------|------------|------------------------------------------|----|-----------------------------------------|------------------------|--------|-----------------------------|----------------|
| 25. | Luna, et al.   | 2021 | Artificial intelligence application versus physical therapist for squat evaluation: a randomized controlled trial                                                                     | United States | Medicine   | Physical therapy                         | 30 | AI-assisted exercise application        | Unassisted exercise    | Single | Successful squats           | NCT04624594    |
| 26. | Medina, et al. | 2021 | Electrophysiological brain changes associated with cognitive improvement in a pediatric attention deficit hyperactivity disorder digital artificial intelligence-driven intervention: | Spain         | Psychiatry | Attention deficit hyperactivity disorder | 29 | AI-driven cognitive stimulation program | Commercial video games | Single | Conners CPT (CPT-III) score | ISRCTN71041318 |

1  
2  
3  
4  
5  
6  
7  
8  
9  
10  
11  
12  
13  
14  
15  
16  
17  
18  
19  
20  
21  
22  
23  
24  
25  
26  
27  
28  
29  
30  
31  
32  
33  
34  
35  
36  
37  
38  
39  
40  
41  
42  
43  
44  
45  
46

|     |                   |      |                                                                                                                            |               |                  |                             |     |                                    |                                  |      |                                    |                  |
|-----|-------------------|------|----------------------------------------------------------------------------------------------------------------------------|---------------|------------------|-----------------------------|-----|------------------------------------|----------------------------------|------|------------------------------------|------------------|
|     |                   |      | Randomized controlled trial                                                                                                |               |                  |                             |     |                                    |                                  |      |                                    |                  |
| 27. | Mertens, et al.   | 2021 | Artificial intelligence for caries detection: Randomized trial                                                             | Germany       | Dentistry        | Caries                      | 22  | AI-based diagnostic support        | Unaided diagnosis                | None | Accuracy metrics                   | DRKS000223<br>57 |
| 28. | Prochaska, et al. | 2021 | A randomized controlled trial of a therapeutic relational agent for reducing substance misuse during the COVID-19 pandemic | United States | Medicine         | Substance-related disorders | 180 | AI relational conversational agent | No intervention during the study | None | Past-month substance use occasions | NCT0409600<br>1  |
| 29. | Rafferty, et al.  | 2021 | A novel mobile app (heali) for disease treatment in participants with irritable bowel                                      | United States | Gastroenterology | Irritable bowel syndrome    | 58  | AI dietary mobile app              | Educational material             | None | Quality of life score              | NCT0425655<br>1  |

|     |                 |      |                                                                                                                                                                                                               |                  |                   |                      |     |                                    |                         |        |                                                                |                 |
|-----|-----------------|------|---------------------------------------------------------------------------------------------------------------------------------------------------------------------------------------------------------------|------------------|-------------------|----------------------|-----|------------------------------------|-------------------------|--------|----------------------------------------------------------------|-----------------|
|     |                 |      | syndrome:<br>Randomized<br>controlled pilot trial                                                                                                                                                             |                  |                   |                      |     |                                    |                         |        |                                                                |                 |
| 30. | Seok, et<br>al. | 2021 | A personalized 3d-<br>printed model for<br>obtaining informed<br>consent process for<br>thyroid surgery: A<br>randomized clinical<br>study using a deep<br>learning approach<br>with mesh-type 3d<br>modeling | Korea            | Endocrinol<br>ogy | Thyroid<br>lesions   | 53  | AI 3D-printed<br>thyroid model     | Without<br>model        | None   | Patient<br>general<br>knowledge<br>and<br>satisfactio<br>n     | KCT0005069      |
| 31. | Seol, et<br>al. | 2021 | Artificial<br>intelligence-assisted<br>clinical decision<br>support for<br>childhood asthma<br>management: A                                                                                                  | United<br>States | Paediatrics       | Childhoo<br>d asthma | 184 | AI-assisted<br>decision<br>support | Usual<br>asthma<br>care | Single | Asthma<br>exacerbati<br>on<br>occurrence<br>within one<br>year | NCT0286596<br>7 |

1  
2  
3  
4  
5  
6  
7  
8  
9  
10  
11  
12  
13  
14  
15  
16  
17  
18  
19  
20  
21  
22  
23  
24  
25  
26  
27  
28  
29  
30  
31  
32  
33  
34  
35  
36  
37  
38  
39  
40  
41  
42  
43  
44  
45  
46

|     |                   |      |                                                                                                                                                      |               |             |                                       |     |                                  |                             |      |                                      |             |
|-----|-------------------|------|------------------------------------------------------------------------------------------------------------------------------------------------------|---------------|-------------|---------------------------------------|-----|----------------------------------|-----------------------------|------|--------------------------------------|-------------|
|     |                   |      | randomized clinical trial                                                                                                                            |               |             |                                       |     |                                  |                             |      |                                      |             |
| 32. | Stromblad, et al. | 2021 | Effect of a Predictive Model on Planned Surgical Duration Accuracy, Patient Wait Time, and Use of Presurgical Resources: A Randomized Clinical Trial | United States | Surgery     | Gynaecological and colorectal surgery | 683 | AI-assisted surgical predictions | Standard estimation process | None | Accurate surgery duration prediction | NCT03471377 |
| 33. | Turino, et al.    | 2021 | Management and treatment of patients with obstructive sleep apnea using an intelligent monitoring system                                             | Spain         | Pulmonology | Obstructive sleep apnea               | 60  | Intelligent monitoring system    | Standard management         | None | Compliance to CPAP                   | NCT03116958 |

|     |              |      |                                                                                                                                                                  |       |                  |                      |    |                                            |                 |      |                                        |    |
|-----|--------------|------|------------------------------------------------------------------------------------------------------------------------------------------------------------------|-------|------------------|----------------------|----|--------------------------------------------|-----------------|------|----------------------------------------|----|
|     |              |      | based on machine learning aiming to improve continuous positive airway pressure treatment compliance:<br>Randomized controlled trial                             |       |                  |                      |    |                                            |                 |      |                                        |    |
| 34. | Wang, et al. | 2021 | Utilization of Ultrasonic Image Characteristics Combined with Endoscopic Detection on the Basis of Artificial Intelligence Algorithm in Diagnosis of Early Upper | China | Gastroenterology | Early gastric cancer | 80 | Endoscopy with AI-based ultrasound imaging | Endoscopy alone | None | Detection rate of upper gastric cancer | NR |

1  
2  
3  
4  
5  
6  
7  
8  
9  
10  
11  
12  
13  
14  
15  
16  
17  
18  
19  
20  
21  
22  
23  
24  
25  
26  
27  
28  
29  
30  
31  
32  
33  
34  
35  
36  
37  
38  
39  
40  
41  
42  
43  
44  
45  
46



1  
2  
3  
4  
5  
6  
7  
8  
9  
10  
11  
12  
13  
14  
15  
16  
17  
18  
19  
20  
21  
22  
23  
24  
25  
26  
27  
28  
29  
30  
31  
32  
33  
34  
35  
36  
37  
38  
39  
40  
41  
42  
43  
44  
45  
46

|     |            |      |                                                                                                                                                                                                 |       |                  |                      |      |                       |                   |        |                                        |                  |
|-----|------------|------|-------------------------------------------------------------------------------------------------------------------------------------------------------------------------------------------------|-------|------------------|----------------------|------|-----------------------|-------------------|--------|----------------------------------------|------------------|
|     |            |      | Gastrointestinal<br>Cancer                                                                                                                                                                      |       |                  |                      |      |                       |                   |        |                                        |                  |
| 35. | Wu, et al. | 2021 | Evaluation of the effects of an artificial intelligence system on endoscopy quality and preliminary testing of its performance in detecting early gastric cancer: a randomized controlled trial | China | Gastroenterology | Early gastric cancer | 1050 | AI-aided endoscopy    | Endoscopy alone   | Single | Number of blind spots during endoscopy | ChiCTR1800018403 |
| 36. | Wu, et al. | 2021 | Effect of a deep learning-based system on the miss rate of gastric neoplasms during                                                                                                             | China | Gastroenterology | Gastric neoplasm     | 1886 | AI-assisted endoscopy | Unaided endoscopy | Single | Gastric neoplasm miss rate             | ChiCTR2000034453 |

|     |            |      |                                                                                                                                            |       |                  |                     |      |                              |                                |      |                            |                      |
|-----|------------|------|--------------------------------------------------------------------------------------------------------------------------------------------|-------|------------------|---------------------|------|------------------------------|--------------------------------|------|----------------------------|----------------------|
|     |            |      | upper<br>gastrointestinal<br>endoscopy: a<br>single-centre,<br>tandem, randomised<br>controlled trial                                      |       |                  |                     |      |                              |                                |      |                            |                      |
| 37. | Xu, et al. | 2021 | The Clinical Value<br>of Explainable<br>Deep Learning for<br>Diagnosing Fungal<br>Keratitis Using in<br>vivo Confocal<br>Microscopy Images | China | Ophthalmology    | Fungal<br>keratitis | 1089 | AI-assisted<br>image reading | Unassisted<br>image<br>reading | None | Accuracy                   | NR                   |
| 38. | Xu, et al. | 2021 | Artificial<br>intelligence-assisted<br>colonoscopy: A<br>prospective,<br>multicenter,<br>randomized                                        | China | Gastroenterology | Polyp               | 2352 | AI-assisted<br>colonoscopy   | Conventional<br>colonoscopy    | None | Polyp<br>detection<br>rate | ChiCTR1800<br>015607 |

1  
2  
3  
4  
5  
6  
7  
8  
9  
10  
11  
12  
13  
14  
15  
16  
17  
18  
19  
20  
21  
22  
23  
24  
25  
26  
27  
28  
29  
30  
31  
32  
33  
34  
35  
36  
37  
38  
39  
40  
41  
42  
43  
44  
45  
46

|     |              |      |                                                                                                                                                      |               |            |                          |     |                                                        |                    |      |                                        |             |
|-----|--------------|------|------------------------------------------------------------------------------------------------------------------------------------------------------|---------------|------------|--------------------------|-----|--------------------------------------------------------|--------------------|------|----------------------------------------|-------------|
|     |              |      | controlled trial of polyp detection                                                                                                                  |               |            |                          |     |                                                        |                    |      |                                        |             |
| 39. | Yao, et al.  | 2021 | Artificial intelligence-enabled electrocardiograms for identification of patients with low ejection fraction: a pragmatic, randomized clinical trial | United States | Cardiology | Low ejection fraction    | 358 | AI-enabled electrocardiograms                          | Usual care         | None | New diagnosis of low ejection fraction | NCT04000087 |
| 40. | Zeng, et al. | 2021 | Long-Term Assessment of Rehabilitation Treatment of Sports through Artificial Intelligence Research                                                  | China         | Medicine   | Sports health management | 150 | AI-based personalized sports management service system | General management | None | Blood glucose, blood pressure, lipids  | NR          |

|     |               |      |                                                                                                                                                   |       |             |                |    |                                        |                    |        |                                                                        |    |
|-----|---------------|------|---------------------------------------------------------------------------------------------------------------------------------------------------|-------|-------------|----------------|----|----------------------------------------|--------------------|--------|------------------------------------------------------------------------|----|
| 41. | Zhang, et al. | 2021 | Artificial Intelligence Algorithm-Based Ultrasound Image Segmentation Technology in the Diagnosis of Breast Cancer Axillary Lymph Node Metastasis | China | Oncology    | Breast cancer  | 90 | AI-based ultrasound image segmentation | Routine ultrasound | Double | Accuracy metrics                                                       | NR |
| 42. | Zhang, et al. | 2021 | Value of Rehabilitation Training for Children with Cerebral Palsy Diagnosed and Analyzed by Computed Tomography                                   | China | Paediatrics | Cerebral palsy | 73 | AI-assisted analysis of brain images   | Original images    | None   | Cerebral artery blood flow velocity (VP) and Vascular pulse index (PI) | NR |

1  
2  
3  
4  
5  
6  
7  
8  
9  
10  
11  
12  
13  
14  
15  
16  
17  
18  
19  
20  
21  
22  
23  
24  
25  
26  
27  
28  
29  
30  
31  
32  
33  
34  
35  
36  
37  
38  
39  
40  
41  
42  
43  
44  
45  
46

|  |  |  |                |  |  |  |  |  |  |  |  |  |
|--|--|--|----------------|--|--|--|--|--|--|--|--|--|
|  |  |  | Imaging        |  |  |  |  |  |  |  |  |  |
|  |  |  | Information    |  |  |  |  |  |  |  |  |  |
|  |  |  | Features under |  |  |  |  |  |  |  |  |  |
|  |  |  | Deep Learning  |  |  |  |  |  |  |  |  |  |

1. Sadasivam RS, Borglund EM, Adams R, Marlin BM, Houston TK. Impact of a collective intelligence tailored messaging system on smoking cessation: the Perspect randomized experiment. *JMIR* 2016;18(11):e285.
2. Morrison LG, Hargood C, Pejovic V, Geraghty AW, Lloyd S, Goodman N, et al. The effect of timing and frequency of push notifications on usage of a smartphone-based stress management intervention: an exploratory trial. *PloS one* 2017;12(1):e0169162.
3. Labovitz DL, Shafner L, Reyes Gil M, Virmani D, Hanina A. Using artificial intelligence to reduce the risk of nonadherence in patients on anticoagulation therapy. *Stroke* 2017;48(5):1416-9.
4. Rostill H, Nilforooshan R, Morgan A, Barnaghi P, Ream E, Chrysanthaki T. Technology integrated health management for dementia. *Br J Community Nurs* 2018;23(10):502-8.
5. Wang P, Berzin TM, Brown JRG, Bharadwaj S, Becq A, Xiao X, et al. Real-time automatic detection system increases colonoscopic polyp and adenoma detection rates: a prospective randomised controlled study. *Gut* 2019;68(10):1813-9.

- 1  
2  
3 6. Lin H, Li R, Liu Z, Chen J, Yang Y, Chen H, et al. Diagnostic efficacy and therapeutic decision-making capacity of an artificial  
4 intelligence platform for childhood cataracts in eye clinics: a multicentre randomized controlled trial. *EClinicalMedicine* 2019; 9: 52–  
5  
6 9.  
7
- 8  
9  
10 7. Voss C, Schwartz J, Daniels J, Kline A, Haber N, Washington P, et al. Effect of wearable digital intervention for improving  
11 socialization in children with autism spectrum disorder: a randomized clinical trial. *JAMA Pediatr* 2019;173(5):446-54.  
12
- 13 8. Wu L, Zhang J, Zhou W, An P, Shen L, Liu J, et al. Randomised controlled trial of WISENSE, a real-time quality improving system  
14 for monitoring blind spots during esophagogastroduodenoscopy. *Gut* 2019;68(12):2161-9.  
15
- 16 9. Wang P, Liu X, Berzin TM, Brown JRG, Liu P, Zhou C, et al. Effect of a deep-learning computer-aided detection system on  
17 adenoma detection during colonoscopy (CADe-DB trial): a double-blind randomised study. *Lancet Gastroenterol Hepatol*  
18 2020;5(4):343-51.  
19
- 20 10. Persell SD, Peprah YA, Lipiszko D, Lee JY, Li JJ, Ciolino JD, et al. Effect of home blood pressure monitoring via a smartphone  
21 hypertension coaching application or tracking application on adults with uncontrolled hypertension: a randomized clinical trial. *JAMA*  
22 *Netw Open* 2020;3(3):e200255-e.  
23
- 24 11. Wijnberge M, Geerts BF, Hol L, Lemmers N, Mulder MP, Berge P, et al. Effect of a machine learning–derived early warning system  
25 for intraoperative hypotension vs standard care on depth and duration of intraoperative hypotension during elective noncardiac  
26 surgery: the HYPE randomized clinical trial. *JAMA* 2020;323(11):1052-60.  
27  
28  
29  
30  
31  
32  
33  
34  
35  
36  
37  
38  
39  
40  
41  
42  
43  
44  
45  
46

- 1  
2  
3 12. Pavel AM, Rennie JM, de Vries LS, Blennow M, Foran A, Shah DK, et al. A machine-learning algorithm for neonatal seizure  
4 recognition: a multicentre, randomised, controlled trial. *The Lancet Child & Adolescent Health* 2020;4(10):740-9.  
5  
6  
7  
8 13. Nimri R, Battelino T, Laffel LM, Slover RH, Schatz D, Weinzimer SA, et al. Insulin dose optimization using an automated artificial  
9 intelligence-based decision support system in youths with type 1 diabetes. *Nature medicine* 2020;26(9):1380-4.  
10  
11  
12 14. Liu P, Wang P, Glissen Brown JR, Berzin TM, Zhou G, Liu W, et al. The single-monitor trial: an embedded CAde system increased  
13 adenoma detection during colonoscopy: a prospective randomized study. *Therap Adv Gastroenterol* 2020;13:1756284820979165.  
14  
15  
16  
17 15. Gong D, Wu L, Zhang J, Mu G, Shen L, Liu J, et al. Detection of colorectal adenomas with a real-time computer-aided system  
18 (ENDOANGEL): a randomised controlled study. *Lancet Gastroenterol Hepatol* 2020;5(4):352-61.  
19  
20  
21  
22 16. Luo Y, Zhang Y, Liu M, Lai Y, Liu P, Wang Z, Xing T, Huang Y, Li Y, Li A, Wang Y. Artificial intelligence-assisted colonoscopy  
23 for detection of colon polyps: a prospective, randomized cohort study. *Journal of Gastrointestinal Surgery* 2021;25(8):2011-8.  
24  
25  
26  
27 17. Anan T, Kajiki S, Oka H, et al. Effects of an Artificial Intelligence-Assisted Health Program on Workers With Neck/Shoulder  
28 Pain/Stiffness and Low Back Pain: Randomized Controlled Trial. *JMIR Mhealth Uhealth* 2021;9(9):e27535.  
29  
30  
31 18. 1. Blomberg SN, Christensen HC, Lippert F, et al. Effect of Machine Learning on Dispatcher Recognition of Out-of-Hospital Cardiac Arrest  
32 During Calls to Emergency Medical Services: A Randomized Clinical Trial. *JAMA Netw Open* 2021;4(1):e2032320.  
33  
34  
35  
36 19. Chen J, Gao Y. The Role of Deep Learning-Based Echocardiography in the Diagnosis and Evaluation of the Effects of Routine Anti-Heart-  
37 Failure Western Medicines in Elderly Patients with Acute Left Heart Failure. *Journal of Healthcare Engineering* 2021;2021  
38  
39  
40  
41  
42  
43  
44  
45  
46

- 1  
2  
3  
4  
5  
6  
7  
8  
9  
10  
11  
12  
13  
14  
15  
16  
17  
18  
19  
20  
21  
22  
23  
24  
25  
26  
27  
28  
29  
30  
31  
32  
33  
34  
35  
36  
37  
38  
39  
40  
41  
42  
43  
44  
45  
46
20. Eng DK, Khandwala NB, Long J, et al. Artificial intelligence algorithm improves radiologist performance in skeletal age assessment: A prospective multicenter randomized controlled trial. *Radiology* 2021;301(3):692-99.
  21. Harada Y, Katsukura S, Kawamura R, et al. Efficacy of artificial-intelligence-driven differential-diagnosis list on the diagnostic accuracy of physicians: An open-label randomized controlled study. *International Journal of Environmental Research and Public Health* 2021;18(4):1-10.
  22. Hassoon A, Baig Y, Naiman DQ, et al. Randomized trial of two artificial intelligence coaching interventions to increase physical activity in cancer survivors. *npj Digital Medicine* 2021;4(1)
  23. Jayakumar P, Moore MG, Furlough KA, et al. Comparison of an Artificial Intelligence-Enabled Patient Decision Aid vs Educational Material on Decision Quality, Shared Decision-Making, Patient Experience, and Functional Outcomes in Adults with Knee Osteoarthritis: A Randomized Clinical Trial. *JAMA Network Open* 2021;4(2)
  24. Kamba S, Tamai N, Saitoh I, et al. Reducing adenoma miss rate of colonoscopy assisted by artificial intelligence: a multicenter randomized controlled trial. *Journal of Gastroenterology* 2021;56(8):746-57.
  25. Luna A, Casertano L, Timmerberg J, et al. Artificial intelligence application versus physical therapist for squat evaluation: a randomized controlled trial. *Scientific reports* 2021;11(1):18109.



- 1  
2  
3 26. Medina R, Bouhaben J, de Ramon I, et al. Electrophysiological brain changes associated with cognitive improvement in a pediatric attention  
4 deficit hyperactivity disorder digital artificial intelligence-driven intervention: Randomized controlled trial. *Journal of Medical Internet*  
5  
6 *Research* 2021;23(11)  
7  
8  
9  
10 27. Mertens S, Krois J, Cantu AG, et al. Artificial intelligence for caries detection: Randomized trial. *J Dent* 2021;115:103849.  
11  
12 28. Prochaska JJ, Vogel EA, Chieng A, et al. A randomized controlled trial of a therapeutic relational agent for reducing substance misuse  
13 during the COVID-19 pandemic. *Drug and Alcohol Dependence* 2021;227  
14  
15  
16  
17 29. Rafferty AJ, Hall R, Johnston CS. A novel mobile app (heali) for disease treatment in participants with irritable bowel syndrome:  
18 Randomized controlled pilot trial. *Journal of Medical Internet Research* 2021;23(3)  
19  
20  
21 30. Seok J, Yoon S, Ryu CH, et al. A personalized 3d-printed model for obtaining informed consent process for thyroid surgery: A randomized  
22 clinical study using a deep learning approach with mesh-type 3d modeling. *Journal of Personalized Medicine* 2021;11(6)  
23  
24  
25  
26 31. Seol HY, Shrestha P, Muth JF, et al. Artificial intelligence-assisted clinical decision support for childhood asthma management: A  
27 randomized clinical trial. *PLoS ONE* 2021;16(8 August)  
28  
29  
30  
31 32. Stromblad CT, Baxter-King RG, Meisami A, et al. Effect of a Predictive Model on Planned Surgical Duration Accuracy, Patient Wait Time,  
32 and Use of Presurgical Resources: A Randomized Clinical Trial. *JAMA Surgery* 2021;156(4):315-21.  
33  
34  
35  
36  
37  
38  
39  
40  
41  
42  
43  
44  
45  
46

- 1  
2  
3 33. Turino C, Benitez ID, Rafael-Palou X, et al. Management and treatment of patients with obstructive sleep apnea using an intelligent  
4 monitoring system based on machine learning aiming to improve continuous positive airway pressure treatment compliance: Randomized  
5 controlled trial. *Journal of Medical Internet Research* 2021;23(10)  
6  
7  
8  
9  
10 34. Wang L, Song H, Wang M, et al. Utilization of Ultrasonic Image Characteristics Combined with Endoscopic Detection on the Basis of  
11 Artificial Intelligence Algorithm in Diagnosis of Early Upper Gastrointestinal Cancer. *J Healthc Eng* 2021;2021:2773022.  
12  
13 35. Wu L, He X, Liu M, et al. Evaluation of the effects of an artificial intelligence system on endoscopy quality and preliminary testing of its  
14 performance in detecting early gastric cancer: a randomized controlled trial. *Endoscopy* 2021;53(12):1199-207  
15  
16  
17 36. Wu L, Shang R, Sharma P, et al. Effect of a deep learning-based system on the miss rate of gastric neoplasms during upper gastrointestinal  
18 endoscopy: a single-centre, tandem, randomised controlled trial. *The Lancet Gastroenterology and Hepatology* 2021;6(9):700-08.  
19  
20  
21 37. Xu F, Jiang L, He W, et al. The Clinical Value of Explainable Deep Learning for Diagnosing Fungal Keratitis Using in vivo Confocal  
22 Microscopy Images. *Frontiers in Medicine* 2021;8  
23  
24  
25 38. Xu L, He X, Zhou J, et al. Artificial intelligence-assisted colonoscopy: A prospective, multicenter, randomized controlled trial of polyp  
26 detection. *Cancer Medicine* 2021;10(20):7184-93.  
27  
28  
29 39. Yao X, Rushlow DR, Inselman JW, et al. Artificial intelligence-enabled electrocardiograms for identification of patients with low ejection  
30 fraction: a pragmatic, randomized clinical trial. *Nature Medicine* 2021;27(5):815-19.  
31  
32  
33 40. Zeng C, Huang Y, Yu L, et al. Long-Term Assessment of Rehabilitation Treatment of Sports through Artificial Intelligence Research.  
34  
35  
36  
37  
38  
39  
40  
41  
42  
43  
44  
45  
46

- 1  
2  
3 41. Zhang L, Jia Z, Leng X, et al. Artificial Intelligence Algorithm-Based Ultrasound Image Segmentation Technology in the Diagnosis of  
4 Breast Cancer Axillary Lymph Node Metastasis. *J Healthc Eng* 2021;2021:8830260.  
5  
6  
7  
8 42. Zhang X, Wang Z, Liu J, et al. Value of Rehabilitation Training for Children with Cerebral Palsy Diagnosed and Analyzed by Computed  
9 Tomography Imaging Information Features under Deep Learning. *J Healthc Eng* 2021;2021:6472440.  
10  
11  
12  
13  
14  
15  
16  
17  
18  
19  
20  
21  
22  
23  
24  
25  
26  
27  
28  
29  
30  
31  
32  
33  
34  
35  
36  
37  
38  
39  
40  
41  
42  
43  
44  
45  
46

For peer review only

1  
2  
3 **Search Strategy:**  
4  
5

6 **FOR EMBASE:**  
7  
8

- 9 1) \*deep learning/  
10  
11 2) \*artificial intelligence/  
12  
13 3) \*machine learning/  
14  
15 4) 1 or 2 or 3  
16  
17

18  
19 **For PubMed:**  
20  
21

- 22 1. Artificial intelligence  
23  
24 2. Machine learning  
25  
26 3. Deep learning  
27  
28 4. 1 OR 2 OR 3  
29  
30  
31

32 **Restricted to:**  
33  
34

- 35 • Article type: Randomized Control Trial  
36  
37 • Publication Date: 1/01/2015 to 31/12/2021  
38  
39 • Species: Human  
40  
41 • Language: English  
42  
43  
44  
45  
46  
47  
48  
49  
50  
51  
52  
53  
54  
55  
56  
57  
58  
59  
60

# Reporting checklist for systematic review (with or without a meta-analysis).

Based on the PRISMA guidelines.

## Instructions to authors

Complete this checklist by entering the page numbers from your manuscript where readers will find each of the items listed below.

Your article may not currently address all the items on the checklist. Please modify your text to include the missing information. If you are certain that an item does not apply, please write "n/a" and provide a short explanation.

Upload your completed checklist as an extra file when you submit to a journal.

In your methods section, say that you used the PRISMA reporting guidelines, and cite them as:

Page MJ, McKenzie JE, Bossuyt PM, Boutron I, Hoffmann TC, Mulrow CD, Shamseer L, Tetzlaff JM, Akl EA, Brennan SE, Chou R, Glanville J, Grimshaw JM, Hróbjartsson A, Lalu MM, Li T, Loder EW, Mayo-Wilson E, McDonald S, McGuinness LA, Stewart LA, Thomas J, Tricco AC, Welch VA, Whiting P, Moher D. The PRISMA 2020 statement: An updated guideline for reporting systematic reviews

|                      | Reporting Item                                                                                           | Page Number |
|----------------------|----------------------------------------------------------------------------------------------------------|-------------|
| <b>Title</b>         |                                                                                                          |             |
| Title                | <a href="#">#1</a> Identify the report as a systematic review                                            | 1           |
| <b>Abstract</b>      |                                                                                                          |             |
| Abstract             | <a href="#">#2</a> Report an abstract addressing each item in the PRISMA 2020 for Abstracts checklist    | 3           |
| <b>Introduction</b>  |                                                                                                          |             |
| Background/rationale | <a href="#">#3</a> Describe the rationale for the review in the context of existing knowledge            | 4           |
| Objectives           | <a href="#">#4</a> Provide an explicit statement of the objective(s) or question(s) the review addresses | 5           |

## Methods

|    |                               |                      |                                                                                                                                                                                                                                                                                                      |     |
|----|-------------------------------|----------------------|------------------------------------------------------------------------------------------------------------------------------------------------------------------------------------------------------------------------------------------------------------------------------------------------------|-----|
| 1  | Eligibility criteria          | <a href="#">#5</a>   | Specify the inclusion and exclusion criteria for the review and how studies were grouped for the syntheses                                                                                                                                                                                           | 6   |
| 2  |                               |                      |                                                                                                                                                                                                                                                                                                      |     |
| 3  |                               |                      |                                                                                                                                                                                                                                                                                                      |     |
| 4  | Information sources           | <a href="#">#6</a>   | Specify all databases, registers, websites, organisations, reference lists, and other sources searched or consulted to identify studies. Specify the date when each source was last searched or consulted                                                                                            | 6   |
| 5  |                               |                      |                                                                                                                                                                                                                                                                                                      |     |
| 6  |                               |                      |                                                                                                                                                                                                                                                                                                      |     |
| 7  |                               |                      |                                                                                                                                                                                                                                                                                                      |     |
| 8  |                               |                      |                                                                                                                                                                                                                                                                                                      |     |
| 9  |                               |                      |                                                                                                                                                                                                                                                                                                      |     |
| 10 |                               |                      |                                                                                                                                                                                                                                                                                                      |     |
| 11 | Search strategy               | <a href="#">#7</a>   | Present the full search strategies for all databases, registers, and websites, including any filters and limits used                                                                                                                                                                                 | 6   |
| 12 |                               |                      |                                                                                                                                                                                                                                                                                                      |     |
| 13 |                               |                      |                                                                                                                                                                                                                                                                                                      |     |
| 14 |                               |                      |                                                                                                                                                                                                                                                                                                      |     |
| 15 | Selection process             | <a href="#">#8</a>   | Specify the methods used to decide whether a study met the inclusion criteria of the review, including how many reviewers screened each record and each report retrieved, whether they worked independently, and, if applicable, details of automation tools used in the process                     | 6   |
| 16 |                               |                      |                                                                                                                                                                                                                                                                                                      |     |
| 17 |                               |                      |                                                                                                                                                                                                                                                                                                      |     |
| 18 |                               |                      |                                                                                                                                                                                                                                                                                                      |     |
| 19 |                               |                      |                                                                                                                                                                                                                                                                                                      |     |
| 20 |                               |                      |                                                                                                                                                                                                                                                                                                      |     |
| 21 |                               |                      |                                                                                                                                                                                                                                                                                                      |     |
| 22 |                               |                      |                                                                                                                                                                                                                                                                                                      |     |
| 23 | Data collection process       | <a href="#">#9</a>   | Specify the methods used to collect data from reports, including how many reviewers collected data from each report, whether they worked independently, any processes for obtaining or confirming data from study investigators, and, if applicable, details of automation tools used in the process | 7   |
| 24 |                               |                      |                                                                                                                                                                                                                                                                                                      |     |
| 25 |                               |                      |                                                                                                                                                                                                                                                                                                      |     |
| 26 |                               |                      |                                                                                                                                                                                                                                                                                                      |     |
| 27 |                               |                      |                                                                                                                                                                                                                                                                                                      |     |
| 28 |                               |                      |                                                                                                                                                                                                                                                                                                      |     |
| 29 |                               |                      |                                                                                                                                                                                                                                                                                                      |     |
| 30 |                               |                      |                                                                                                                                                                                                                                                                                                      |     |
| 31 |                               |                      |                                                                                                                                                                                                                                                                                                      |     |
| 32 |                               |                      |                                                                                                                                                                                                                                                                                                      |     |
| 33 | Data items                    | <a href="#">#10a</a> | List and define all outcomes for which data were sought. Specify whether all results that were compatible with each outcome domain in each study were sought (for example, for all measures, time points, analyses), and, if not, the methods used to decide which results to collect                | 7   |
| 34 |                               |                      |                                                                                                                                                                                                                                                                                                      |     |
| 35 |                               |                      |                                                                                                                                                                                                                                                                                                      |     |
| 36 |                               |                      |                                                                                                                                                                                                                                                                                                      |     |
| 37 |                               |                      |                                                                                                                                                                                                                                                                                                      |     |
| 38 |                               |                      |                                                                                                                                                                                                                                                                                                      |     |
| 39 |                               |                      |                                                                                                                                                                                                                                                                                                      |     |
| 40 |                               |                      |                                                                                                                                                                                                                                                                                                      |     |
| 41 |                               |                      |                                                                                                                                                                                                                                                                                                      |     |
| 42 | Study risk of bias assessment | <a href="#">#11</a>  | Specify the methods used to assess risk of bias in the included studies, including details of the tool(s) used, how many reviewers assessed each study and whether they worked independently, and, if applicable, details of automation tools used in the process                                    | n/a |
| 43 |                               |                      |                                                                                                                                                                                                                                                                                                      |     |
| 44 |                               |                      |                                                                                                                                                                                                                                                                                                      |     |
| 45 |                               |                      |                                                                                                                                                                                                                                                                                                      |     |
| 46 |                               |                      |                                                                                                                                                                                                                                                                                                      |     |
| 47 |                               |                      |                                                                                                                                                                                                                                                                                                      |     |
| 48 |                               |                      |                                                                                                                                                                                                                                                                                                      |     |
| 49 |                               |                      |                                                                                                                                                                                                                                                                                                      |     |
| 50 | Effect measures               | <a href="#">#12</a>  | Specify for each outcome the effect measure(s) (such as risk ratio, mean difference) used in the synthesis or presentation of results                                                                                                                                                                | 7   |
| 51 |                               |                      |                                                                                                                                                                                                                                                                                                      |     |
| 52 |                               |                      |                                                                                                                                                                                                                                                                                                      |     |
| 53 |                               |                      |                                                                                                                                                                                                                                                                                                      |     |
| 54 |                               |                      |                                                                                                                                                                                                                                                                                                      |     |
| 55 | Synthesis methods             | <a href="#">#13a</a> | Describe the processes used to decide which studies were eligible for each synthesis (such as tabulating the study                                                                                                                                                                                   | n/a |
| 56 |                               |                      |                                                                                                                                                                                                                                                                                                      |     |
| 57 |                               |                      |                                                                                                                                                                                                                                                                                                      |     |
| 58 |                               |                      |                                                                                                                                                                                                                                                                                                      |     |
| 59 |                               |                      |                                                                                                                                                                                                                                                                                                      |     |
| 60 |                               |                      |                                                                                                                                                                                                                                                                                                      |     |

|    |                      |                                                                                                                       |     |
|----|----------------------|-----------------------------------------------------------------------------------------------------------------------|-----|
| 1  |                      | intervention characteristics and comparing against the                                                                |     |
| 2  |                      | planned groups for each synthesis (item #5))                                                                          |     |
| 3  |                      |                                                                                                                       |     |
| 4  | Synthesis methods    | <a href="#">#13b</a> Describe any methods required to prepare the data for                                            | n/a |
| 5  |                      | presentation or synthesis, such as handling of missing                                                                |     |
| 6  |                      | summary statistics or data conversions                                                                                |     |
| 7  |                      |                                                                                                                       |     |
| 8  |                      |                                                                                                                       |     |
| 9  | Synthesis methods    | <a href="#">#13c</a> Describe any methods used to tabulate or visually display                                        | n/a |
| 10 |                      | results of individual studies and syntheses                                                                           |     |
| 11 |                      |                                                                                                                       |     |
| 12 |                      |                                                                                                                       |     |
| 13 | Synthesis methods    | <a href="#">#13d</a> Describe any methods used to synthesise results and provide                                      | n/a |
| 14 |                      | a rationale for the choice(s). If meta-analysis was                                                                   |     |
| 15 |                      | performed, describe the model(s), method(s) to identify the                                                           |     |
| 16 |                      | presence and extent of statistical heterogeneity, and                                                                 |     |
| 17 |                      | software package(s) used                                                                                              |     |
| 18 |                      |                                                                                                                       |     |
| 19 |                      |                                                                                                                       |     |
| 20 |                      |                                                                                                                       |     |
| 21 | Synthesis methods    | <a href="#">#13e</a> Describe any methods used to explore possible causes of                                          | n/a |
| 22 |                      | heterogeneity among study results (such as subgroup                                                                   |     |
| 23 |                      | analysis, meta-regression)                                                                                            |     |
| 24 |                      |                                                                                                                       |     |
| 25 |                      |                                                                                                                       |     |
| 26 |                      |                                                                                                                       |     |
| 27 | Synthesis methods    | <a href="#">#13f</a> Describe any sensitivity analyses conducted to assess                                            | n/a |
| 28 |                      | robustness of the synthesised results                                                                                 |     |
| 29 |                      |                                                                                                                       |     |
| 30 | Reporting bias       | <a href="#">#14</a> Describe any methods used to assess risk of bias due to                                           | n/a |
| 31 | assessment           | missing results in a synthesis (arising from reporting biases)                                                        |     |
| 32 |                      |                                                                                                                       |     |
| 33 |                      |                                                                                                                       |     |
| 34 | Certainty assessment | <a href="#">#15</a> Describe any methods used to assess certainty (or                                                 | n/a |
| 35 |                      | confidence) in the body of evidence for an outcome                                                                    |     |
| 36 |                      |                                                                                                                       |     |
| 37 |                      |                                                                                                                       |     |
| 38 | Data items           | <a href="#">#10b</a> List and define all other variables for which data were                                          | n/a |
| 39 |                      | sought (such as participant and intervention characteristics,                                                         |     |
| 40 |                      | funding sources). Describe any assumptions made about any                                                             |     |
| 41 |                      | missing or unclear information                                                                                        |     |
| 42 |                      |                                                                                                                       |     |
| 43 |                      |                                                                                                                       |     |
| 44 |                      |                                                                                                                       |     |
| 45 | <b>Results</b>       |                                                                                                                       |     |
| 46 |                      |                                                                                                                       |     |
| 47 | Study selection      | <a href="#">#16a</a> Describe the results of the search and selection process,                                        | 7   |
| 48 |                      | from the number of records identified in the search to the                                                            |     |
| 49 |                      | number of studies included in the review, ideally using a                                                             |     |
| 50 |                      | flow diagram ( <a href="http://www.prisma-statement.org/PRISMAStatement/FlowDiagram">http://www.prisma-</a>           |     |
| 51 |                      | <a href="http://www.prisma-statement.org/PRISMAStatement/FlowDiagram">statement.org/PRISMAStatement/FlowDiagram</a> ) |     |
| 52 |                      |                                                                                                                       |     |
| 53 |                      |                                                                                                                       |     |
| 54 |                      |                                                                                                                       |     |
| 55 |                      |                                                                                                                       |     |
| 56 | Study selection      | <a href="#">#16b</a> Cite studies that might appear to meet the inclusion criteria,                                   | 7   |
| 57 |                      | but which were excluded, and explain why they were                                                                    |     |
| 58 |                      | excluded                                                                                                              |     |
| 59 |                      |                                                                                                                       |     |
| 60 |                      |                                                                                                                       |     |

|    |                         |                      |                                                                 |                          |
|----|-------------------------|----------------------|-----------------------------------------------------------------|--------------------------|
| 1  | Study characteristics   | <a href="#">#17</a>  | Cite each included study and present its characteristics        | supplementary<br>table 2 |
| 2  |                         |                      |                                                                 |                          |
| 3  |                         |                      |                                                                 |                          |
| 4  | Risk of bias in studies | <a href="#">#18</a>  | Present assessments of risk of bias for each included study     | n/a                      |
| 5  |                         |                      |                                                                 |                          |
| 6  |                         |                      |                                                                 |                          |
| 7  | Results of individual   | <a href="#">#19</a>  | For all outcomes, present for each study (a) summary            | 8                        |
| 8  | studies                 |                      | statistics for each group (where appropriate) and (b) an        |                          |
| 9  |                         |                      | effect estimate and its precision (such as                      |                          |
| 10 |                         |                      | confidence/credible interval), ideally using structured tables  |                          |
| 11 |                         |                      | or plots                                                        |                          |
| 12 |                         |                      |                                                                 |                          |
| 13 |                         |                      |                                                                 |                          |
| 14 |                         |                      |                                                                 |                          |
| 15 | Results of syntheses    | <a href="#">#20a</a> | For each synthesis, briefly summarise the characteristics       | n/a                      |
| 16 |                         |                      | and risk of bias among contributing studies                     |                          |
| 17 |                         |                      |                                                                 |                          |
| 18 |                         |                      |                                                                 |                          |
| 19 | Results of syntheses    | <a href="#">#20b</a> | Present results of all statistical syntheses conducted. If      | n/a                      |
| 20 |                         |                      | meta-analysis was done, present for each the summary            |                          |
| 21 |                         |                      | estimate and its precision (such as confidence/credible         |                          |
| 22 |                         |                      | interval) and measures of statistical heterogeneity. If         |                          |
| 23 |                         |                      | comparing groups, describe the direction of the effect          |                          |
| 24 |                         |                      |                                                                 |                          |
| 25 |                         |                      |                                                                 |                          |
| 26 |                         |                      |                                                                 |                          |
| 27 | Results of syntheses    | <a href="#">#20c</a> | Present results of all investigations of possible causes of     | n/a                      |
| 28 |                         |                      | heterogeneity among study results                               |                          |
| 29 |                         |                      |                                                                 |                          |
| 30 |                         |                      |                                                                 |                          |
| 31 | Results of syntheses    | <a href="#">#20d</a> | Present results of all sensitivity analyses conducted to assess | n/a                      |
| 32 |                         |                      | the robustness of the synthesised results                       |                          |
| 33 |                         |                      |                                                                 |                          |
| 34 |                         |                      |                                                                 |                          |
| 35 | Risk of reporting       | <a href="#">#21</a>  | Present assessments of risk of bias due to missing results      | n/a                      |
| 36 | biases in syntheses     |                      | (arising from reporting biases) for each synthesis assessed     |                          |
| 37 |                         |                      |                                                                 |                          |
| 38 |                         |                      |                                                                 |                          |
| 39 | Certainty of evidence   | <a href="#">#22</a>  | Present assessments of certainty (or confidence) in the body    | n/a                      |
| 40 |                         |                      | of evidence for each outcome assessed                           |                          |
| 41 |                         |                      |                                                                 |                          |
| 42 |                         |                      |                                                                 |                          |
| 43 | <b>Discussion</b>       |                      |                                                                 |                          |
| 44 |                         |                      |                                                                 |                          |
| 45 | Results in context      | <a href="#">#23a</a> | Provide a general interpretation of the results in the context  | 11                       |
| 46 |                         |                      | of other evidence                                               |                          |
| 47 |                         |                      |                                                                 |                          |
| 48 |                         |                      |                                                                 |                          |
| 49 | Limitations of          | <a href="#">#23b</a> | Discuss any limitations of the evidence included in the         | 14                       |
| 50 | included studies        |                      | review                                                          |                          |
| 51 |                         |                      |                                                                 |                          |
| 52 |                         |                      |                                                                 |                          |
| 53 | Limitations of the      | <a href="#">#23c</a> | Discuss any limitations of the review processes used            | 14                       |
| 54 | review methods          |                      |                                                                 |                          |
| 55 |                         |                      |                                                                 |                          |
| 56 |                         |                      |                                                                 |                          |
| 57 | Implications            | <a href="#">#23d</a> | Discuss implications of the results for practice, policy, and   | 14                       |
| 58 |                         |                      | future research                                                 |                          |
| 59 |                         |                      |                                                                 |                          |
| 60 |                         |                      |                                                                 |                          |



## Other information

|    |                       |                      |                                                              |               |
|----|-----------------------|----------------------|--------------------------------------------------------------|---------------|
| 1  |                       |                      |                                                              |               |
| 2  |                       |                      |                                                              |               |
| 3  | Registration and      | <a href="#">#24a</a> | Provide registration information for the review, including   | 7             |
| 4  | protocol              |                      | register name and registration number, or state that the     |               |
| 5  |                       |                      | review was not registered                                    |               |
| 6  |                       |                      |                                                              |               |
| 7  |                       |                      |                                                              |               |
| 8  | Registration and      | <a href="#">#24b</a> | Indicate where the review protocol can be accessed, or state | 7             |
| 9  | protocol              |                      | that a protocol was not prepared                             |               |
| 10 |                       |                      |                                                              |               |
| 11 |                       |                      |                                                              |               |
| 12 | Registration and      | <a href="#">#24c</a> | Describe and explain any amendments to information           | 7             |
| 13 | protocol              |                      | provided at registration or in the protocol                  |               |
| 14 |                       |                      |                                                              |               |
| 15 |                       |                      |                                                              |               |
| 16 | Support               | <a href="#">#25</a>  | Describe sources of financial or non-financial support for   | 15            |
| 17 |                       |                      | the review, and the role of the funders or sponsors in the   |               |
| 18 |                       |                      | review                                                       |               |
| 19 |                       |                      |                                                              |               |
| 20 |                       |                      |                                                              |               |
| 21 | Competing interests   | <a href="#">#26</a>  | Declare any competing interests of review authors            | 15            |
| 22 |                       |                      |                                                              |               |
| 23 |                       |                      |                                                              |               |
| 24 | Availability of data, | <a href="#">#27</a>  | Report which of the following are publicly available and     | supplementary |
| 25 | code, and other       |                      | where they can be found: template data collection forms;     | table 2       |
| 26 | materials             |                      | data extracted from included studies; data used for all      |               |
| 27 |                       |                      | analyses; analytic code; any other materials used in the     |               |
| 28 |                       |                      | review                                                       |               |
| 29 |                       |                      |                                                              |               |
| 30 |                       |                      |                                                              |               |
| 31 |                       |                      |                                                              |               |

### Notes:

- 17: supplementary table 2
- 27: supplementary table 2 The PRISMA checklist is distributed under the terms of the Creative Commons Attribution License CC-BY. This checklist was completed on 12. July 2022 using <https://www.goodreports.org/>, a tool made by the [EQUATOR Network](#) in collaboration with [Penelope.ai](#)

# BMJ Open

## Quality of reporting of randomised controlled trials in artificial intelligence in health care: a systematic review

|                                 |                                                                                                                                                                                               |
|---------------------------------|-----------------------------------------------------------------------------------------------------------------------------------------------------------------------------------------------|
| Journal:                        | <i>BMJ Open</i>                                                                                                                                                                               |
| Manuscript ID                   | bmjopen-2022-061519.R2                                                                                                                                                                        |
| Article Type:                   | Original research                                                                                                                                                                             |
| Date Submitted by the Author:   | 16-Aug-2022                                                                                                                                                                                   |
| Complete List of Authors:       | Shahzad, Rida; Shahzad Eye Hospital<br>Ayub, Bushra; Aga Khan University Hospital<br>Siddiqui, M. A. Rehman; Aga Khan University Hospital, Department of<br>Ophthalmology and Visual Sciences |
| <b>Primary Subject Heading</b>: | Medical publishing and peer review                                                                                                                                                            |
| Secondary Subject Heading:      | Qualitative research                                                                                                                                                                          |
| Keywords:                       | STATISTICS & RESEARCH METHODS, Clinical trials < THERAPEUTICS,<br>Health informatics < BIOTECHNOLOGY & BIOINFORMATICS                                                                         |
|                                 |                                                                                                                                                                                               |

SCHOLARONE™  
Manuscripts



I, the Submitting Author has the right to grant and does grant on behalf of all authors of the Work (as defined in the below author licence), an exclusive licence and/or a non-exclusive licence for contributions from authors who are: i) UK Crown employees; ii) where BMJ has agreed a CC-BY licence shall apply, and/or iii) in accordance with the terms applicable for US Federal Government officers or employees acting as part of their official duties; on a worldwide, perpetual, irrevocable, royalty-free basis to BMJ Publishing Group Ltd ("BMJ") its licensees and where the relevant Journal is co-owned by BMJ to the co-owners of the Journal, to publish the Work in this journal and any other BMJ products and to exploit all rights, as set out in our [licence](#).

The Submitting Author accepts and understands that any supply made under these terms is made by BMJ to the Submitting Author unless you are acting as an employee on behalf of your employer or a postgraduate student of an affiliated institution which is paying any applicable article publishing charge ("APC") for Open Access articles. Where the Submitting Author wishes to make the Work available on an Open Access basis (and intends to pay the relevant APC), the terms of reuse of such Open Access shall be governed by a Creative Commons licence – details of these licences and which [Creative Commons](#) licence will apply to this Work are set out in our licence referred to above.

Other than as permitted in any relevant BMJ Author's Self Archiving Policies, I confirm this Work has not been accepted for publication elsewhere, is not being considered for publication elsewhere and does not duplicate material already published. I confirm all authors consent to publication of this Work and authorise the granting of this licence.

1  
2  
3  
4 **Quality of reporting of randomised controlled trials in artificial intelligence in health**  
5  
6 **care: a systematic review**  
7  
8  
9

10  
11 **Authors:**  
12

13 Rida Shahzad<sup>1</sup>  
14

15 Bushra Ayub<sup>2</sup>  
16

17 M. A. Rehman Siddiqui<sup>1,3,4</sup>  
18  
19

20  
21  
22 **Affiliations:**  
23

- 24  
25 1. Shahzad Eye Hospital, Karachi, Pakistan  
26  
27 2. Aga Khan University Hospital, Karachi, Pakistan  
28  
29 3. Department of Ophthalmology and Visual Sciences, Aga Khan University Hospital,  
30 Karachi, Pakistan  
31  
32 4. The Eye Centre, South City Hospital, Karachi, Pakistan  
33  
34  
35  
36  
37  
38

39 **Correspondence to:**  
40

41 M. A. Rehman Siddiqui  
42

43 Department of Ophthalmology and Visual Sciences,  
44

45 Aga Khan University Hospital,  
46

47 National Stadium Road, P.O. Box 3500,  
48

49 Karachi, Pakistan  
50

51 Email: rehman.siddiqui@gmail.com  
52  
53  
54  
55

56  
57 **Keywords:** CONSORT, CONSORT-AI, artificial intelligence, deep learning, machine  
58 learning, randomised controlled trials  
59  
60

1  
2  
3  
4  
5 **Word count:** 2518 words  
6  
7  
8  
9

## 10 **ABSTRACT**

11  
12 **Objectives:** The aim of this study was to evaluate the quality of reporting of randomised  
13 controlled trials (RCTs) of artificial intelligence (AI) in health care against Consolidated  
14 Standards of Reporting Trials – Artificial Intelligence (CONSORT-AI) guidelines.  
15  
16  
17  
18

19 **Design:** Systematic review.  
20

21 **Data sources:** We searched PubMed and EMBASE databases for studies reported from  
22 January 2015 to December 2021.  
23  
24  
25

26 **Eligibility criteria:** We included RCTs reported in English that used AI as the intervention.  
27 Protocols, conference abstracts, studies on robotics, and studies related to medical education  
28 were excluded.  
29  
30  
31

32 **Data extraction:** The included studies were graded using the CONSORT-AI checklist,  
33 comprising 43 items, by two independent graders. The results were tabulated and descriptive  
34 statistics were reported.  
35  
36  
37  
38  
39

40 **Results:** We screened 1501 potential abstracts, of which 112 full-text articles were reviewed  
41 for eligibility. A total of 42 studies were included. The number of participants ranged from 22  
42 to 2352. Only two items of the CONSORT-AI items were fully reported in all studies. Five  
43 items were not applicable in more than 85% of the studies. Nineteen per cent (8/42) of the  
44 studies did not report more than 50% (21/43) of the CONSORT-AI checklist items.  
45  
46  
47  
48  
49

50 **Conclusions:** The quality of reporting of RCTs in AI is suboptimal. As reporting is variable  
51 in existing RCTs, caution should be exercised in interpreting the findings of some studies.  
52  
53  
54  
55  
56  
57  
58  
59  
60

## ARTICLE SUMMARY

### Strengths and limitations of this study

- This systematic review assesses the reporting of randomised trials of artificial intelligence interventions across medical fields from 2015 to 2021 against CONSORT-AI guidance, establishing a baseline for future studies.
- We did not separately analyse publications from before and after the publication of the CONSORT-AI guidance in September 2020, so were unable to assess whether there was any change in reporting quality following publication of the guidance.
- Only two databases were searched and only English-language publications were eligible for inclusion.

## INTRODUCTION

Artificial intelligence (AI) is finding increased utility in the medical realm, with a special emphasis on deep learning. Medical applications of AI range from screening, diagnosis, prognosis, and generation of management plans. [1-5] For example, AI has been extensively studied in ophthalmology for various diseases such as diabetic retinopathy, [6] age-related macular degeneration, [7] and glaucoma. [8] However, increased hype associated with AI - without sound evidence base – may result in inappropriate clinical decisions, which can potentially be detrimental to healthcare. [9]

Randomised controlled trials (RCTs) are one of the highest quality of evidence used by clinicians in decision-making regarding interventions. [10] RCTs may be susceptible to various forms of biases. Adequate reporting of RCTs is vital to allow results and conclusions derived from a study to be assessed critically by readers. [11,12]

1  
2  
3 The CONSORT (Consolidated Standards of Reporting Trials) statement was introduced in  
4  
5 1996 to establish guidelines to improve the reporting quality of clinical trials. Additionally,  
6  
7 the CONSORT statement is a useful guide that helps readers with the critical appraisal of  
8  
9 RCTs to ascertain their reliability and clinical applicability. [13] The most recent update of  
10  
11 the CONSORT statement was published in 2010, listing 25 minimum reporting requirements.  
12  
13 [14] Several extensions to CONSORT also exist, which cater to certain specific study  
14  
15 designs. [15-18]  
16  
17  
18  
19  
20

21  
22 There has been an exponential increase in AI-based healthcare studies in recent years due to  
23  
24 rapid advances in computational power. However, the methodological rigor has not kept pace  
25  
26 with the development in technology. For example, the design and quality of reporting in these  
27  
28 studies have not always been adequate. [19,20] CONSORT-AI was published on September  
29  
30 9, 2020 as an extension of the CONSORT 2010 statement to evaluate RCTs involving AI.  
31  
32 Fourteen new items were added to the checklist – including 11 extensions and 3 elaborations.  
33  
34 [21,22] These items mostly relate to the AI intervention in question and are necessary to  
35  
36 independently evaluate and replicate the trial.  
37  
38  
39  
40  
41

42  
43 The aim of this study was to evaluate the quality of reporting of RCTs of AI intervention for  
44  
45 medical conditions, published from 2015 to 2021, based on CONSORT-AI guidelines. While  
46  
47 CONSORT-AI did not exist for much of this timeline, this study will serve as a baseline  
48  
49 measure of reporting quality for comparison with future studies' adherence to CONSORT-AI  
50  
51 guidelines.  
52  
53  
54  
55

## 56 **METHODS**

### 57 **Search strategy**

1  
2  
3 We performed a systematic review of RCTs of AI for medical conditions published from  
4  
5 January 2015 to December 2021. The search date range was initially set as an arbitrary period  
6  
7 of 5 years from 2015-2020; the literature search was later updated to include publications  
8  
9 until December 2021. RCTs of AI in healthcare is a nascent field, and we expected very few  
10  
11 RCTs of AI in healthcare prior to 2015. We searched PubMed and EMBASE databases for  
12  
13 potential studies. The PubMed search was conducted using the MeSH terms: “artificial  
14  
15 intelligence”, “machine learning”, and “deep learning”. The term “artificial intelligence”,  
16  
17 “deep learning” and machine learning” were searched in EMBASE. In both the databases, the  
18  
19 search was limited to RCTs, publications in the English language, from the year 2015 to  
20  
21 2021, and human subjects (Appendix 1).  
22  
23  
24  
25  
26  
27  
28

### 29 **Screening and study selection**

30 The records were screened by two independent investigators (RS and BA) for potential  
31  
32 inclusion. The abstracts of RCTs using artificial intelligence, deep learning, and machine  
33  
34 learning were further evaluated for possible inclusion. Protocols, conference abstracts, studies  
35  
36 on robotics, and post-hoc analyses of randomised controlled trials were excluded.  
37  
38  
39  
40  
41

42 Full-text articles of all shortlisted abstracts were then screened for eligibility. Publications  
43  
44 were included if AI was used as an intervention for a medical condition, if there was a  
45  
46 comparator control group in the study and if there was evidence of randomisation. In case of  
47  
48 a disagreement, a senior reviewer assessed the full text and the disagreement was resolved  
49  
50 with consensus. The exclusion criteria were non-randomised studies, secondary studies, post-  
51  
52 hoc analyses, or if the intervention investigated was not AI. Additionally, if the target  
53  
54 condition was not a medical disease or if the research pertained to medical education, the  
55  
56 study was excluded.  
57  
58  
59  
60



### **Assessment against CONSORT-AI guidance**

The CONSORT-AI checklist of 43 items (Supplementary Table 1) was used to grade the included studies. Each item was scored fully-, partially- or not- reported. If an item was irrelevant to a particular study, it was labelled as “not applicable”. Each publication was scored by two trained graders (RS and BA) independently. Differences were discussed with the senior reviewer (MARS) to reach a consensus.

The results were tabulated by writing all the reported items as the numerator and the total number of applicable items as the denominator. The descriptive statistics for the study population and clinical characteristics are reported. The only deviation from the initial protocol for the review was the extension of the search until December 2021 to keep this review up-to-date.

### **Patient and public involvement**

None.

## **RESULTS**

### **Study selection**

The initial search identified 1501 potential records. One hundred and twelve articles were considered as potentially eligible after screening of abstracts. Following a review of full-text manuscripts, a total of 42 manuscripts were included in the systematic review (Figure 1).

### **General characteristics**

The included studies (Supplementary table 2) were from the years 2016 to 2021(Figure 2).

The number of participants ranged from 22 to 2352. They pertained to various medical fields, including gastroenterology (n = 12) medicine (n = 6), cardiology (n = 5), psychiatry (n = 4), ophthalmology (n = 2), endocrinology (n = 2), paediatrics (n = 2), oncology (n = 2), orthopaedics (n = 2), surgery (n = 1), radiology (n = 1), neurology (n = 1), pulmonology (n = 1) and dentistry (n = 1). Studies were from different parts of the world, including China (n = 16), United States (n = 14), Japan (n = 3), United Kingdom (n = 2), Spain (n = 2), Netherlands (n = 1), Germany (n = 1), Korea (n = 1), Denmark (n = 1) and Israel (n = 1). (Figure 3)

### Adherence to reporting standards

The median number of fully reported CONSORT-AI checklist items in the included studies was 30 (range 7-37) of a possible total of 43. Overall, only 2 (items # 1b, and 21) out of possible 43 items were fully reported in all 42 studies. Five items (items #3b, 6b, 7b, 14b, and 17b) were deemed not applicable in more than 85% of the included studies. The two least reported items were item #5iii (not reported in 36/42 studies) and item #24 (not reported in 31/42 studies). Nineteen per cent (8/42) of included studies did not report more than 50% (21/43) of the CONSORT-AI checklist items. The reporting of each item is given in Table 1.

**Table 1: CONSORT-AI scores of included studies**

|                           | Item       | Fully Reported | Partially Reported | Not Reported | Not Applicable |
|---------------------------|------------|----------------|--------------------|--------------|----------------|
| <b>Title and Abstract</b> | 1a, 1a(i)  | 41             | 1                  | 0            | 0              |
|                           | 1b, 1b(ii) | 42             | 0                  | 0            | 0              |
| <b>Introduction</b>       |            |                |                    |              |                |
| Background and            | 2a, 2a(i)  | 41             | 1                  | 0            | 0              |

|                                  |       |    |   |    |    |
|----------------------------------|-------|----|---|----|----|
| objectives                       | 2b    | 38 | 0 | 4  | 0  |
| <b>Methods</b>                   |       |    |   |    |    |
| Trial Design                     | 3a    | 26 | 6 | 10 | 0  |
|                                  | 3b    | 6  | 0 | 0  | 36 |
| Participants                     | 4ai   | 39 | 0 | 3  | 0  |
|                                  | 4aaii | 15 | 0 | 27 | 0  |
|                                  | 4b    | 40 | 0 | 2  | 0  |
| Intervention                     | 5i    | 15 | 0 | 27 | 0  |
|                                  | 5ii   | 34 | 0 | 8  | 0  |
|                                  | 5iii  | 6  | 0 | 36 | 0  |
|                                  | 5iv   | 37 | 0 | 5  | 0  |
|                                  | 5v    | 41 | 0 | 1  | 0  |
|                                  | 5vi   | 31 | 0 | 11 | 0  |
| Outcomes                         | 6a    | 39 | 0 | 3  | 0  |
|                                  | 6b    | 2  | 0 | 0  | 40 |
| Sample size                      | 7a    | 30 | 0 | 11 | 1  |
|                                  | 7b    | 2  | 0 | 0  | 40 |
| Sequence generation              | 8a    | 34 | 0 | 8  | 0  |
|                                  | 8b    | 25 | 0 | 17 | 0  |
| <b>Randomisation</b>             |       |    |   |    |    |
| Allocation concealment mechanism | 9     | 24 | 0 | 18 | 0  |
| Implementation                   | 10    | 18 | 3 | 21 | 0  |
| Blinding                         | 11a   | 24 | 0 | 18 | 0  |
|                                  | 11b   | 23 | 0 | 17 | 2  |
| Statistical methods              | 12a   | 39 | 0 | 3  | 0  |

|                          |     |    |    |    |    |
|--------------------------|-----|----|----|----|----|
|                          | 12b | 34 | 0  | 8  | 0  |
| <b>Results</b>           |     |    |    |    |    |
| Participant flow         | 13a | 32 | 2  | 8  | 0  |
|                          | 13b | 29 | 1  | 12 | 0  |
| Recruitment              | 14a | 38 | 0  | 4  | 0  |
|                          | 14b | 1  | 0  | 0  | 41 |
| Baseline data            | 15  | 32 | 0  | 10 | 0  |
| Numbers analysed         | 16  | 32 | 1  | 9  | 0  |
| Outcomes and estimation  | 17a | 31 | 3  | 8  | 0  |
|                          | 17b | 1  | 0  | 0  | 41 |
| Ancillary analyses       | 18  | 33 | 0  | 9  | 0  |
| Harms                    | 19  | 4  | 11 | 27 | 0  |
| <b>Discussion</b>        |     |    |    |    |    |
| Limitations              | 20  | 36 | 0  | 6  | 0  |
| Generalizability         | 21  | 42 | 0  | 0  | 0  |
| Interpretation           | 22  | 41 | 0  | 1  | 0  |
| <b>Other information</b> |     |    |    |    |    |
| Registration             | 23  | 35 | 0  | 7  | 0  |
| Protocol                 | 24  | 11 | 0  | 31 | 0  |
| Funding                  | 25  | 10 | 20 | 12 | 0  |

## DISCUSSION

In our review, variable reporting standards of RCTs of AI in healthcare were observed. While some items were reported adequately – for example, those relating to the abstract and

1  
2  
3 introduction of the manuscript – other items particularly in the methods section, had poor  
4 reporting scores.  
5  
6  
7  
8  
9

10 Our results reinforce previously published findings. In a systematic review conducted by Liu  
11 et al., it was seen that sufficient reporting and external validation were done in less than one-  
12 third of the included 82 deep learning studies, thereby limiting their reliability. [23] Similarly,  
13 Nagendran et al. also found deviations from reporting standards, with less than 50%  
14 adherence to 12/29 items in the TRIPOD guidelines, and high levels of bias in AI studies.  
15 [20] Bozkurt et al. reported that demographic specifics of study populations were poorly  
16 reported in studies developing ML models from electronic health records, and external  
17 validation was omitted in 88% of the models. [24] In another systematic review of 28 articles  
18 regarding machine learning models for medical diagnosis, Yusuf et al. discovered that all  
19 studies in their systematic review failed to follow reporting guidelines. [25] Our study also  
20 revealed variable reporting of CONSORT-AI items in RCTs of AI in healthcare, suggesting  
21 there is still room in AI studies for further improving the quality of their reporting.  
22  
23  
24  
25  
26  
27  
28  
29  
30  
31  
32  
33  
34  
35  
36  
37  
38  
39

40 The CONSORT-AI checklist was developed to encourage transparent reporting of RCTs in  
41 AI. The extensions and elaborations added to the original CONSORT guideline largely  
42 emphasize the peculiarities related to AI intervention itself and its clinical application. These  
43 include details of the interventions, such as algorithm version, input and output data, how the  
44 intervention was integrated into the trial, and whether there was human and AI interaction.  
45 This information is crucial for the critical appraisal of a study and facilitates the replication of  
46 clinical trials. [23] These items had variable reporting scores in our study (items 4a to 5vi).  
47 Twenty-seven out of 42 (64%) studies did not mention the version of the AI algorithm used.  
48 This could confuse the reader regarding which version to apply the study findings to because  
49  
50  
51  
52  
53  
54  
55  
56  
57  
58  
59  
60

1  
2  
3 an AI algorithm is likely to undergo multiple updates. [21] Moreover, information regarding  
4 input data was largely missed in the majority of included studies; with only 35% (15/42) of  
5 the studies identifying the inclusion and exclusion criteria at the level of the input data, and a  
6 mere 14% (6/42) of studies reported how poor quality or unavailable input data was handled  
7 and assessed. Such details are essential, as the overall performance of any given AI  
8 intervention relies on the quality of input data. Additionally, this information allows an  
9 evaluator to distinguish AI platforms that may only work in ideal conditions from those  
10 which can be applied to real-world settings. [26,27]  
11  
12  
13  
14  
15  
16  
17  
18  
19  
20  
21  
22  
23

24 On the other hand, items regarding human-AI interaction and required expertise level, as well  
25 as AI output were fully reported by majority of studies (37 and 41/42, respectively). Clarity  
26 about the human-AI interface is essential to ensure a standard approach and functional safety,  
27 as well as to avoid ethical implications. [28,29] For example, it is essential that qualified  
28 experts can interpret dynamically complex variables exhibited by AI interfaces which are  
29 related to patients as well as the clinical context – only then it is possible that AI platforms  
30 enable an improvement in clinicians' decision-making process. [30] It is encouraging to see  
31 most authors report these items clearly.  
32  
33  
34  
35  
36  
37  
38  
39  
40  
41  
42  
43  
44

45 Interestingly, although missing out on important information regarding the details of AI  
46 intervention, 42/42 of the studies were promising generalizability of their findings in the  
47 clinical setting. The generalizability of AI systems may be limited, especially when used in  
48 the real-world setting outside of the environment they were developed in. [31,32] Therefore,  
49 caution must be employed when evaluating such studies.  
50  
51  
52  
53  
54  
55  
56  
57  
58  
59  
60

1  
2  
3 An important factor to consider about CONSORT-AI, however, is the applicability of each  
4 item to clinical trials. Five items of the CONSORT-AI checklist were deemed to be not  
5 applicable in the majority of studies evaluated. Three of these items referred to changes made  
6 to methods and outcomes after trial commencement, and why the trial was ended (items 3b,  
7 6b and 14b). These items pertain to modifications made in the protocol, which was not the  
8 case in most included studies.  
9  
10  
11  
12  
13  
14  
15

16  
17  
18  
19 Another item not applicable to most of the included studies was an explanation about any  
20 interim analysis and stopping guidelines. Since AI is a relatively recent advance in  
21 healthcare, harms and adverse events from AI have not been clearly defined yet. Perhaps this  
22 is the reason stopping guidelines were not reported in 40 out of 42 included studies. This ties  
23 closely to item 19: which requires reporting of adverse events in AI trials and a description of  
24 the analysis of performance errors. AI platforms can make errors that can be difficult to  
25 predict and go beyond human judgement, but may have harmful effects if employed on a  
26 large scale. [31] Only 4/42 studies fully reported this item, even though it is important to  
27 report information about error and outline risk mitigation strategies to decide which settings  
28 and populations the AI intervention can be safely employed in. [21] These points emphasize  
29 that AI clinical trials in healthcare have not integrated the concept of harm related to AI  
30 intervention to determine appropriate stopping guidelines.  
31  
32  
33  
34  
35  
36  
37  
38  
39  
40  
41  
42  
43  
44  
45  
46  
47  
48

49 Certain general observations were made regarding the included RCTs in our review. There  
50 was a large range of sample size (22 to 2352) in the studies. This wide range suggests that a  
51 standard approach to sample size calculation is not practised in RCTs of AI. For example, the  
52 diagnostic accuracy of healthcare professionals is often set higher than that of AI while  
53 employing sample size estimation, which presumes that AI is inferior to humans. [33] It is  
54  
55  
56  
57  
58  
59  
60

1  
2  
3 recommended that sample size calculations are performed using a non-inferior design by  
4  
5 setting a more suitable non-inferiority margin, of diagnostic accuracy, for example, 5%. [34]  
6  
7 Similarly, the majority of the studies took place in China, and were focused on  
8  
9 gastroenterology, making them less representative of other fields and perhaps other parts of  
10  
11 the world.  
12  
13

14  
15  
16  
17 There are some limitations to our review. Potential eligible studies could have been missed in  
18  
19 the inclusion process, as only two databases were searched, and only English-language  
20  
21 publications were eligible for inclusion. The majority of the included studies were published  
22  
23 before the CONSORT-AI checklist was widely available. As such, most study authors would  
24  
25 not have been able to use the guidance to inform their reporting. Furthermore, trial reports  
26  
27 from before and after the publication of the CONSORT-AI guidance were not analysed  
28  
29 separately, so we were not able to assess whether there was any improvement in reporting  
30  
31 quality following publication of the guidance.  
32  
33

34  
35  
36  
37 In conclusion, the standards of reporting in RCTs of AI were variable. We found certain  
38  
39 important information regarding the AI intervention was insufficiently reported in many  
40  
41 studies. Therefore, caution should be employed by healthcare service providers and  
42  
43 policymakers when using these studies to inform decision-making.  
44  
45  
46  
47  
48  
49  
50

## 51 **Contributors**

52  
53 The idea for the study was conceived and planned by MARS. RS and BA carried out the  
54  
55 literature review process including screening of abstracts and review of full-text articles,  
56  
57 while MARS acted as a senior reviewer. RS and BA independently scored the included  
58  
59  
60



1  
2  
3 studies using the CONSORT-AI checklist and disagreements were resolved following a  
4  
5 combined discussion with MARS. The manuscript was prepared by RS and BA and edited by  
6  
7 MARS. All authors reviewed and approved the final manuscript.  
8  
9

### 10 **Funding**

11  
12 None.

### 13 **Competing interests**

14  
15 None declared.

### 16 **Ethics approval statement**

17  
18 This study is a systematic review which did not involve human subjects. Therefore, no ethics  
19  
20 approval was required.  
21  
22

### 23 **Data availability statement**

24  
25 No additional data available.  
26  
27

## 28 **REFERENCES**

- 29  
30  
31  
32  
33  
34  
35  
36  
37  
38 1. McKinney SM, Sieniek M, Godbole V, Godwin J, Antropova N, Ashrafian H, et  
39  
40 al. International evaluation of an AI system for breast cancer screening. *Nature*  
41  
42 2020;577(7788):89-94.  
43  
44  
45 2. Esteva A, Kuprel B, Novoa RA, Ko J, Swetter SM, Blau HM, et al.  
46  
47 Dermatologist-level classification of skin cancer with deep neural networks.  
48  
49 *Nature* 2017;542(7639):115-8.  
50  
51  
52 3. Rajpurkar P, Irvin J, Ball RL, Zhu K, Yang B, Mehta H, et al. Deep learning for  
53  
54 chest radiograph diagnosis: A retrospective comparison of the CheXNeXt  
55  
56 algorithm to practicing radiologists. *PLoS medicine* 2018;15(11):e1002686.  
57  
58  
59  
60

- 1  
2  
3 4. Tyler NS, Mosquera-Lopez CM, Wilson LM, Dodier RH, Branigan DL, Gabo  
4 VB, et al. An artificial intelligence decision support system for the management of  
5 type 1 diabetes. *Nat Metab* 2020;2(7):612-9.  
6  
7
- 8  
9  
10 5. Kim H, Goo JM, Lee KH, Kim YT, Park CM. Preoperative CT-based deep  
11 learning model for predicting disease-free survival in patients with lung  
12 adenocarcinomas. *Radiol* 2020;296(1):216-24.  
13  
14
- 15 6. Wong TY, Bressler NM. Artificial intelligence with deep learning technology  
16 looks into diabetic retinopathy screening. *JAMA* 2016 Dec 13;316(22):2366-7.  
17  
18
- 19 7. von der Emde L, Pfau M, Dysli C, Thiele S, Möller PT, Lindner M, Schmid M,  
20 Fleckenstein M, Holz FG, Schmitz-Valckenberg S. Artificial intelligence for  
21 morphology-based function prediction in neovascular age-related macular  
22 degeneration. *Sci Rep* 2019 Jul 31;9(1):1-2.  
23  
24
- 25 8. Devalla SK, Liang Z, Pham TH, Boote C, Strouthidis NG, Thiery AH, Girard MJ.  
26 Glaucoma management in the era of artificial intelligence. *Br J Ophthalmol* 2020  
27 Mar 1;104(3):301-11.  
28  
29
- 30 9. Navarro CL, Damen JA, Takada T, Nijman SW, Dhiman P, Ma J, Collins GS,  
31 Bajpai R, Riley RD, Moons KG, Hooft L. Risk of bias in studies on prediction  
32 models developed using supervised machine learning techniques: systematic  
33 review. *Br Med J* 2021 Oct 20;375.  
34  
35
- 36 10. Altman DG. Better reporting of randomised controlled trials: the CONSORT  
37 statement. *British Medical Journal Publishing Group*; 1996.  
38  
39
- 40 11. Jüni P, Altman DG, Egger M. Assessing the quality of controlled clinical trials. *Br*  
41 *Med J* 2001;323(7303):42-6.  
42  
43  
44  
45  
46  
47  
48  
49  
50  
51  
52  
53  
54  
55  
56  
57  
58  
59  
60

- 1  
2  
3 12. Schulz KF, Chalmers I, Hayes RJ, Altman DG. Empirical evidence of bias:  
4  
5 dimensions of methodological quality associated with estimates of treatment  
6  
7 effects in controlled trials. *JAMA* 1995;273(5):408-12.  
8  
9
- 10 13. Begg C, Cho M, Eastwood S, Horton R, Moher D, Olkin I, et al. Improving the  
11  
12 quality of reporting of randomized controlled trials: the CONSORT statement.  
13  
14 *JAMA* 1996;276(8):637-9.  
15  
16
- 17 14. Schulz KF, Altman DG, Moher D. CONSORT 2010 statement: updated  
18  
19 guidelines for reporting parallel group randomised trials. *Trials* 2010;11(1):1-8.  
20  
21
- 22 15. Boutron I, Altman DG, Moher D, Schulz KF, Ravaud P. CONSORT statement for  
23  
24 randomized trials of nonpharmacologic treatments: a 2017 update and a  
25  
26 CONSORT extension for nonpharmacologic trial abstracts. *Ann Int Med*  
27  
28 2017;167(1):40-7.  
29  
30
- 31 16. Hopewell S, Clarke M, Moher D, Wager E, Middleton P, Altman DG, et al.  
32  
33 CONSORT for reporting randomised trials in journal and conference abstracts.  
34  
35 *The Lancet* 2008;371(9609):281-3.  
36  
37
- 38 17. Gagnier JJ, Boon H, Rochon P, Moher D, Barnes J, Bombardier C. Reporting  
39  
40 randomized, controlled trials of herbal interventions: an elaborated CONSORT  
41  
42 statement. *Ann Int Med* 2006;144(5):364-7.  
43  
44
- 45 18. Calvert M, Blazeby J, Altman DG, Revicki DA, Moher D, Brundage MD, et al.  
46  
47 Reporting of patient-reported outcomes in randomized trials: the CONSORT PRO  
48  
49 extension. *JAMA* 2013;309(8):814-22.  
50  
51
- 52 19. Gregory J, Welliver S, Chong J. Top 10 reviewer critiques of radiology artificial  
53  
54 intelligence (AI) articles: qualitative thematic analysis of reviewer critiques of  
55  
56 machine learning/deep learning manuscripts submitted to JMIR. *J Magn Reson*  
57  
58 *Imaging* 2020;52(1):248-54.  
59  
60

- 1  
2  
3 20. Nagendran M, Chen Y, Lovejoy CA, Gordon AC, Komorowski M, Harvey H, et  
4 al. Artificial intelligence versus clinicians: systematic review of design, reporting  
5 standards, and claims of deep learning studies. *Br Med J* 2020;368.  
6  
7
- 8  
9  
10 21. Liu X, Rivera SC, Faes L, Di Ruffano LF, Yau C, Keane PA, et al. Reporting  
11 guidelines for clinical trials evaluating artificial intelligence interventions are  
12 needed. *Nat Med* 2019;25:1467-8.  
13  
14
- 15  
16  
17 22. Liu X, Rivera SC, Moher D, et al. Reporting guidelines for clinical trial reports for  
18 interventions involving artificial intelligence: the CONSORT-AI Extension. *BMJ*  
19 2020;370:m3164.  
20  
21
- 22  
23  
24 23. Liu X, Faes L, Kale AU, et al. A comparison of deep learning performance against  
25 health-care professionals in detecting diseases from medical imaging: a systematic  
26 review and meta-analysis. *Lancet Digit Health* 2019;1(6):e271-e97  
27  
28
- 29  
30  
31 24. Bozkurt S, Cahan EM, Seneviratne MG, et al. Reporting of demographic data and  
32 representativeness in machine learning models using electronic health records. *J*  
33 *Am Med Inform Assoc* 2020;27(12):1878-84.  
34  
35
- 36  
37  
38 25. Yusuf M, Atal I, Li J, et al. Reporting quality of studies using machine learning  
39 models for medical diagnosis: a systematic review. *BMJ Open*  
40 2020;10(3):e034568.  
41  
42
- 43  
44  
45 26. Sabottke CF, Spieler BM. The effect of image resolution on deep learning in  
46 radiography. *Radiol Artif Intell* 2020 Jan 22;2(1):e190015.  
47  
48
- 49  
50  
51 27. Ibrahim H, Liu X, Rivera SC, Moher D, Chan AW, Sydes MR, Calvert MJ,  
52 Denniston AK. Reporting guidelines for clinical trials of artificial intelligence  
53 interventions: the SPIRIT-AI and CONSORT-AI guidelines. *Trials* 2021  
54 Dec;22(1):1-5.  
55  
56  
57  
58  
59  
60

- 1  
2  
3  
4  
5  
6  
7  
8  
9  
10  
11  
12  
13  
14  
15  
16  
17  
18  
19  
20  
21  
22  
23  
24  
25  
26  
27  
28  
29  
30  
31  
32  
33  
34  
35  
36  
37  
38  
39  
40  
41  
42  
43  
44  
45  
46  
47  
48  
49  
50  
51  
52  
53  
54  
55  
56  
57  
58  
59  
60
28. Wiens J, Saria S, Sendak M, Ghassemi M, Liu VX, Doshi-Velez F, Jung K, Heller K, Kale D, Saeed M, Ossorio PN. Do no harm: a roadmap for responsible machine learning for health care. *Nat Me* 2019 Sep;25(9):1337-40.
  29. Habli I, Lawton T, Porter Z. Artificial intelligence in health care: accountability and safety. *Bull World Health Organ* 2020 Apr 1;98(4):251.
  30. Shortliffe EH, Sepúlveda MJ. Clinical decision support in the era of artificial intelligence. *JAMA* 2018 Dec 4;320(21):2199-200.
  31. Kelly CJ, Karthikesalingam A, Suleyman M, Corrado G, King D. Key challenges for delivering clinical impact with artificial intelligence. *BMC Med* 2019 Dec;17(1):1-9.
  32. Pooch EH, Ballester P, Barros RC. Can We Trust Deep Learning Based Diagnosis? The Impact of Domain Shift in Chest Radiograph Classification. In International Workshop on Thoracic Image Analysis 2020 Oct 8 (pp. 74-83). Springer, Cham.
  33. Lin H, Li R, Liu Z, Chen J, Yang Y, Chen H, et al. Diagnostic efficacy and therapeutic decision-making capacity of an artificial intelligence platform for childhood cataracts in eye clinics: a multicentre randomized controlled trial. *EClinicalMedicine* 2019; 9: 52–9.
  34. Zhou Q, Cao YH, Chen ZH. Optimizing the study design of clinical trials to identify the efficacy of artificial intelligence tools in clinical practices. *EClinicalMedicine* 2019 Nov 1;16:10-1.

1  
2  
3 **FIGURE TITLES:**  
4  
5  
6  
7

8 **Figure 1: PRISMA flowchart**  
9  
10

11  
12 **Figure 2: Year-wise distribution of RCTs in AI**  
13  
14

15  
16  
17 **Figure 3: Percentage of AI RCTs in different countries and specialties**  
18  
19  
20  
21  
22  
23  
24  
25  
26  
27  
28  
29  
30  
31  
32  
33  
34  
35  
36  
37  
38  
39  
40  
41  
42  
43  
44  
45  
46  
47  
48  
49  
50  
51  
52  
53  
54  
55  
56  
57  
58  
59  
60

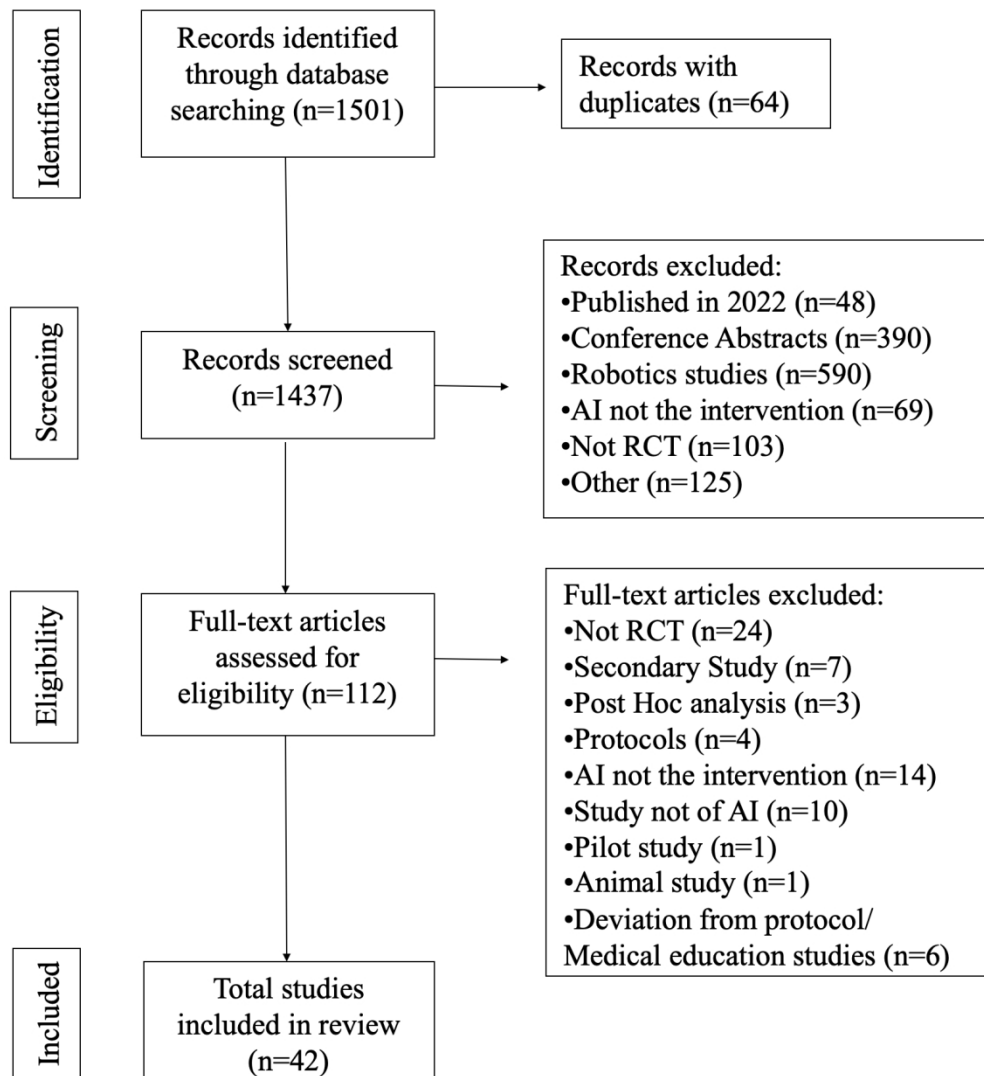

Figure 1: PRISMA flowchart

293x349mm (144 x 144 DPI)

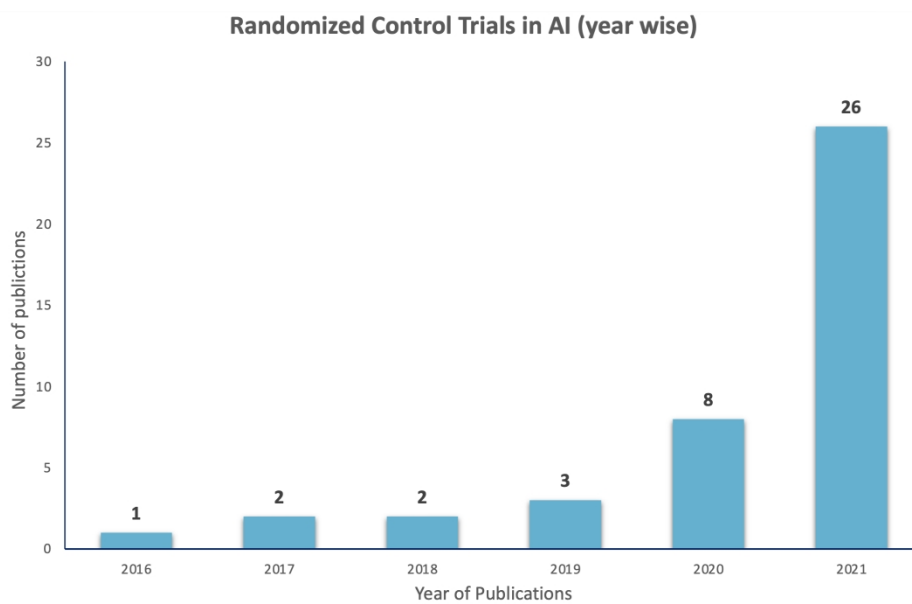

26  
27  
28  
29  
30  
31  
32  
33  
34  
35  
36  
37  
38  
39  
40  
41  
42  
43  
44  
45  
46  
47  
48  
49  
50  
51  
52  
53  
54  
55  
56  
57  
58  
59  
60

Figure 2: Year-wise distribution of RCTs in AI

403x244mm (144 x 144 DPI)



1  
2  
3  
4  
5  
6  
7  
8  
9  
10  
11  
12  
13  
14  
15  
16  
17  
18  
19  
20  
21  
22  
23  
24  
25  
26  
27  
28  
29  
30  
31  
32  
33  
34  
35  
36  
37  
38  
39  
40  
41  
42  
43  
44  
45  
46  
47  
48  
49  
50  
51  
52  
53  
54  
55  
56  
57  
58  
59  
60

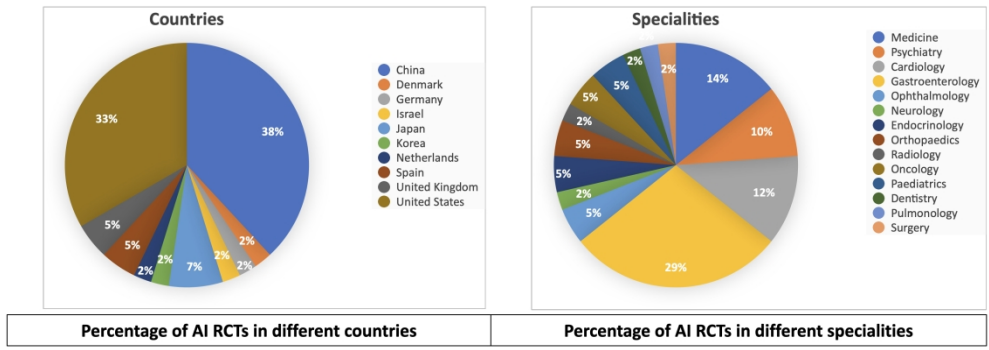

Figure 3: Percentage of AI RCTs in different countries and specialties

608x295mm (144 x 144 DPI)

Supplementary table 1: CONSORT-AI checklist\*\*

| Section                   | Item | CONSORT 2010 item                                                                                                       | CONSORT-AI item               | Addressed on page no.*                                                                                                                                |
|---------------------------|------|-------------------------------------------------------------------------------------------------------------------------|-------------------------------|-------------------------------------------------------------------------------------------------------------------------------------------------------|
| <b>Title and abstract</b> |      |                                                                                                                         |                               |                                                                                                                                                       |
| Title and abstract        | 1a   | Identification as a randomized trial in the title                                                                       | CONSORT-AI a,b<br>Elaboration | (i) Indicate that the intervention involves artificial intelligence/machine learning in the title and/or abstract and specify the type of model.      |
|                           | 1b   | Structured summary of trial design, methods, results, and conclusions (for specific guidance see CONSORT for abstracts) |                               | (ii) State the intended use of the AI intervention within the trial in the title and/or abstract.                                                     |
| <b>Introduction</b>       |      |                                                                                                                         |                               |                                                                                                                                                       |
| Background and objectives | 2a   | Scientific background and explanation of rationale                                                                      | CONSORT-AI a (i)<br>Extension | Explain the intended use of the AI intervention in the context of the clinical pathway, including its purpose and its intended users (e.g. healthcare |

|                |    |                                                                                                    |                              |                                                                                                                       |  |
|----------------|----|----------------------------------------------------------------------------------------------------|------------------------------|-----------------------------------------------------------------------------------------------------------------------|--|
|                |    |                                                                                                    |                              | professionals, patients, public).                                                                                     |  |
|                | 2b | Specific objectives or hypotheses                                                                  |                              |                                                                                                                       |  |
| <b>Methods</b> |    |                                                                                                    |                              |                                                                                                                       |  |
| Trial design   | 3a | Description of trial design (such as parallel, factorial) including allocation ratio               |                              |                                                                                                                       |  |
|                | 3b | Important changes to methods after trial commencement (such as eligibility criteria), with reasons |                              |                                                                                                                       |  |
| Participants   | 4a | Eligibility criteria for participants                                                              | CONSORT-AI a (i) Elaboration | State the inclusion and exclusion criteria at the level of participants.                                              |  |
|                |    |                                                                                                    | CONSORT-AI a (ii) Extension  | State the inclusion and exclusion criteria at the level of the input data.                                            |  |
|                | 4b | Settings and locations where the data were collected                                               | CONSORT-AI b Extension       | Describe how the AI intervention was integrated into the trial setting, including any onsite or on site requirements. |  |

|               |    |                                                                                                                                       |                            |                                                                                                                                      |  |
|---------------|----|---------------------------------------------------------------------------------------------------------------------------------------|----------------------------|--------------------------------------------------------------------------------------------------------------------------------------|--|
| Interventions | 5  | The interventions for each group with sufficient details to allow replication, including how and when they were actually administered | CONSORT-AI (i) Extension   | State which version of the AI algorithm was used.                                                                                    |  |
|               |    |                                                                                                                                       | CONSORT-AI (ii) Extension  | Describe how the input data were acquired and selected for the AI intervention.                                                      |  |
|               |    |                                                                                                                                       | CONSORT-AI (iii) Extension | Describe how poor quality or unavailable input data were assessed and handled.                                                       |  |
|               |    |                                                                                                                                       | CONSORT-AI (iv) Extension. | Specify whether there was human-AI interaction in the handling of the input data, and what level of expertise was required of users. |  |
|               |    |                                                                                                                                       | CONSORT-AI (v) Extension   | Specify the output of the AI intervention                                                                                            |  |
|               |    |                                                                                                                                       | CONSORT-AI (vi) Extension  | Explain how the AI intervention's outputs contributed to decision-making or other elements of clinical practice.                     |  |
| Outcomes      | 6a | Completely defined pre-specified primary and secondary outcome                                                                        |                            |                                                                                                                                      |  |

|                                  |    |                                                                                                                                                  |  |  |  |
|----------------------------------|----|--------------------------------------------------------------------------------------------------------------------------------------------------|--|--|--|
|                                  |    | measures, including how and when they were assessed                                                                                              |  |  |  |
|                                  | 6b | Any changes to trial outcomes after the trial commenced, with reasons                                                                            |  |  |  |
| Sample size                      | 7a | How sample size was determined                                                                                                                   |  |  |  |
|                                  | 7b | When applicable, explanation of any interim analyses and stopping guidelines                                                                     |  |  |  |
| Sequence generation              | 8a | Method used to generate the random allocation sequence                                                                                           |  |  |  |
|                                  | 8b | Type of randomization; details of any restriction (such as blocking and block size)                                                              |  |  |  |
| <b>Randomization</b>             |    |                                                                                                                                                  |  |  |  |
| Allocation concealment mechanism | 9  | Mechanism used to implement the random allocation sequence (such as sequentially numbered containers), describing any steps taken to conceal the |  |  |  |

|                     |     |                                                                                                                                          |  |  |  |
|---------------------|-----|------------------------------------------------------------------------------------------------------------------------------------------|--|--|--|
|                     |     | sequence until interventions were assigned                                                                                               |  |  |  |
| Implementation      | 10  | Who generated the random allocation sequence, who enrolled participants, and who assigned participants to interventions                  |  |  |  |
| Blinding            | 11a | If done, who was blinded after assignment to interventions (for example, participants, care providers, those assessing outcomes) and how |  |  |  |
|                     | 11b | If relevant, description of the similarity of interventions                                                                              |  |  |  |
| Statistical methods | 12a | Statistical methods used to compare groups for primary and secondary outcomes                                                            |  |  |  |
|                     | 12b | Methods for additional analyses, such as subgroup analyses and adjusted analyses                                                         |  |  |  |
| <b>Results</b>      |     |                                                                                                                                          |  |  |  |

|                                                         |     |                                                                                                                                                |  |  |  |
|---------------------------------------------------------|-----|------------------------------------------------------------------------------------------------------------------------------------------------|--|--|--|
| Participant flow<br>(a diagram is strongly recommended) | 13a | For each group, the numbers of participants who were randomly assigned, received intended treatment, and were analyzed for the primary outcome |  |  |  |
|                                                         | 13b | For each group, losses and exclusions after randomization, together with reasons                                                               |  |  |  |
| Recruitment                                             | 14a | Dates defining the periods of recruitment and follow-up                                                                                        |  |  |  |
|                                                         | 14b | Why the trial ended or was stopped                                                                                                             |  |  |  |
| Baseline data                                           | 15  | A table showing baseline demographic and clinical characteristics for each group                                                               |  |  |  |
| Numbers analyzed                                        | 16  | For each group, number of participants (denominator) included in each analysis and whether the analysis was by original assigned groups        |  |  |  |
| Outcomes and estimation                                 | 17a | For each primary and secondary outcome,                                                                                                        |  |  |  |

|                    |     |                                                                                                                                           |                      |                                                                                                                                                                    |  |
|--------------------|-----|-------------------------------------------------------------------------------------------------------------------------------------------|----------------------|--------------------------------------------------------------------------------------------------------------------------------------------------------------------|--|
|                    |     | results for each group, and the estimated effect size and its precision (such as % confidence interval)                                   |                      |                                                                                                                                                                    |  |
|                    | 17b | For binary outcomes, presentation of both absolute and relative effect sizes is recommended                                               |                      |                                                                                                                                                                    |  |
| Ancillary analyses | 18  | Results of any other analyses performed, including subgroup analyses and adjusted analyses, distinguishing pre-specified from exploratory |                      |                                                                                                                                                                    |  |
| Harms              | 19  | All important harms or unintended effects in each group (for specific guidance see CONSORT for harms)                                     | CONSORT-AI Extension | Describe results of any analysis of performance errors and how errors were identified, where applicable. If no such analysis was planned or done, justify why not. |  |
| <b>Discussion</b>  |     |                                                                                                                                           |                      |                                                                                                                                                                    |  |
| Limitations        | 20  | Trial limitations, addressing sources of potential bias,                                                                                  |                      |                                                                                                                                                                    |  |



|                          |    |                                                                                                               |                       |                                                                                                                            |  |
|--------------------------|----|---------------------------------------------------------------------------------------------------------------|-----------------------|----------------------------------------------------------------------------------------------------------------------------|--|
|                          |    | imprecision, and, if relevant, multiplicity of analyses                                                       |                       |                                                                                                                            |  |
| Generalizability         | 21 | Generalizability (external validity, applicability) of the trial findings                                     |                       |                                                                                                                            |  |
| Interpretation           | 22 | Interpretation consistent with results, balancing benefits and harms, and considering other relevant evidence |                       |                                                                                                                            |  |
| <b>Other information</b> |    |                                                                                                               |                       |                                                                                                                            |  |
| Registration             | 23 | Registration number and name of trial registry                                                                |                       |                                                                                                                            |  |
| Protocol                 | 24 | Where the full trial protocol can be accessed, if available                                                   |                       |                                                                                                                            |  |
| Funding                  | 25 | Sources of funding and other support (such as supply of drugs), role of funders                               | CONSORT-AI Extension. | State whether and how the AI intervention and/or its code can be accessed, including any restrictions to access or re-use. |  |
|                          |    |                                                                                                               |                       |                                                                                                                            |  |

1  
2  
3 \*Indicates page numbers to be completed by authors during protocol development  
4

5 \*\* 22. Liu X, Rivera SC, Moher D, et al. Reporting guidelines for clinical trial reports for interventions  
6 involving artificial intelligence: the CONSORT-AI Extension. BMJ 2020;370:m3164.  
7  
8  
9

10  
11  
12  
13  
14  
15  
16  
17  
18  
19  
20  
21  
22  
23  
24  
25  
26  
27  
28  
29  
30  
31  
32  
33  
34  
35  
36  
37  
38  
39  
40  
41  
42  
43  
44  
45  
46  
47  
48  
49  
50  
51  
52  
53  
54  
55  
56  
57  
58  
59  
60

For peer review only

1  
2  
3  
4  
5  
6  
7  
8  
9  
10  
11  
12  
13  
14  
15  
16  
17  
18  
19  
20  
21  
22  
23  
24  
25  
26  
27  
28  
29  
30  
31  
32  
33  
34  
35  
36  
37  
38  
39  
40  
41  
42  
43  
44  
45  
46

Supplementary table 2: Included studies

| No. | Authors               | Year | Title                                                                                                                                          | Country          | Specialty  | Disease studied      | Sample size | Intervention                                        | Control                                                                | Blinding                   | Primary outcome             | Trial registration |
|-----|-----------------------|------|------------------------------------------------------------------------------------------------------------------------------------------------|------------------|------------|----------------------|-------------|-----------------------------------------------------|------------------------------------------------------------------------|----------------------------|-----------------------------|--------------------|
| 1.  | Sadasiva<br>m, et al. | 2016 | Impact of a<br>Collective<br>Intelligence<br>Tailored Messaging<br>System on Smoking<br>Cessation: The<br>Perspect<br>Randomized<br>Experiment | United<br>States | Medicine   | Smoking<br>addiction | 120         | AI<br>recommended<br>motivational<br>messages       | Standard<br>tailored<br>messages                                       | Single<br>(study<br>staff) | Influence<br>of<br>messages | NR                 |
| 2.  | Morrison<br>, et al.  | 2017 | The Effect of<br>Timing and<br>Frequency of Push<br>Notifications on<br>Usage of a<br>Smartphone- Based<br>Stress Management                   | United<br>States | Psychiatry | Stress               | 77          | Smartphone-<br>based stress<br>management<br>system | Daily/oc<br>casional<br>notificati<br>ons<br>within<br>pre-<br>defined | Not stated                 | Notificatio<br>n response   | ISRCTN6717<br>7737 |

|    |                  |      |                                                                                                         |                |                  |                 |      |                                                      |                      |            |                        |                     |
|----|------------------|------|---------------------------------------------------------------------------------------------------------|----------------|------------------|-----------------|------|------------------------------------------------------|----------------------|------------|------------------------|---------------------|
|    |                  |      | Intervention: An Exploratory Trial                                                                      |                |                  |                 |      |                                                      | time frames          |            |                        |                     |
| 3. | Labovitz, et al. | 2017 | Using Artificial Intelligence to Reduce the Risk of Nonadherence in Patients on Anticoagulation Therapy | United States  | Cardiology       | Ischemic stroke | 28   | AI system monitoring                                 | No daily monitoring  | Not stated | Adherence to therapy   | NCT02599259         |
| 4. | Rostill, et al.  | 2018 | Technology integrated health management for dementia                                                    | United Kingdom | Psychiatry       | Dementia        | 408  | Technology-integrated health management for dementia | No TIHM              | Not stated | Alerts                 | NR                  |
| 5. | Wang, et al      | 2018 | Real-time automatic detection system increases colonoscopic polyp and adenoma                           | China          | Gastroenterology | Adenoma         | 1058 | AI-aided colonoscopy                                 | Standard colonoscopy | None       | Adenoma detection rate | ChiCTR-DDD-17012221 |

1  
2  
3  
4  
5  
6  
7  
8  
9  
10  
11  
12  
13  
14  
15  
16  
17  
18  
19  
20  
21  
22  
23  
24  
25  
26  
27  
28  
29  
30  
31  
32  
33  
34  
35  
36  
37  
38  
39  
40  
41  
42  
43  
44  
45  
46

|    |             |      |                                                                                                                                                                                       |       |               |          |     |                                |               |        |                                              |                 |
|----|-------------|------|---------------------------------------------------------------------------------------------------------------------------------------------------------------------------------------|-------|---------------|----------|-----|--------------------------------|---------------|--------|----------------------------------------------|-----------------|
|    |             |      | detection rates: a prospective randomised controlled study                                                                                                                            |       |               |          |     |                                |               |        |                                              |                 |
| 6. | Lin, et al. | 2019 | Diagnostic Efficacy and Therapeutic Decision-making Capacity of an Artificial Intelligence Platform for Childhood Cataracts in Eye Clinics: A Multicentre Randomized Controlled Trial | China | Ophthalmology | Cataract | 350 | AI-assisted cataract detection | Normal clinic | Double | Diagnostic accuracy for congenital cataracts | NCT0324084<br>8 |

|    |              |      |                                                                                                                                           |               |                  |                  |     |                                      |                                      |        |                                                     |                  |
|----|--------------|------|-------------------------------------------------------------------------------------------------------------------------------------------|---------------|------------------|------------------|-----|--------------------------------------|--------------------------------------|--------|-----------------------------------------------------|------------------|
| 7. | Voss, et al. | 2019 | Effect of Wearable Digital Intervention for Improving Socialization in Children With Autism Spectrum Disorder A Randomized Clinical Trial | United States | Psychiatry       | Autism           | 474 | AI-driven behavioral intervention    | Applied behavior analysis therapy    | Single | SRS-II, EGG, VABS-II, NEPSY-II socialization scores | NCT03569176      |
| 8. | Wu, et al.   | 2019 | Randomised controlled trial of WISENSE, a real-time quality improving system for monitoring blind spots                                   | China         | Gastroenterology | Upper GI lesions | 324 | AI-aided esophagogastrroduodenoscopy | Standard esophagogastrroduodenoscopy | Single | Blind spot rate                                     | ChiCTR1800014809 |

1  
2  
3  
4  
5  
6  
7  
8  
9  
10  
11  
12  
13  
14  
15  
16  
17  
18  
19  
20  
21  
22  
23  
24  
25  
26  
27  
28  
29  
30  
31  
32  
33  
34  
35  
36  
37  
38  
39  
40  
41  
42  
43  
44  
45  
46

|     |                 |      |                                                                                                                                                    |               |                      |                  |      |                           |                                      |        |                                              |                      |
|-----|-----------------|------|----------------------------------------------------------------------------------------------------------------------------------------------------|---------------|----------------------|------------------|------|---------------------------|--------------------------------------|--------|----------------------------------------------|----------------------|
|     |                 |      | during<br>esophagogastroduo<br>denoscopy                                                                                                           |               |                      |                  |      |                           |                                      |        |                                              |                      |
| 9.  | Wang, et al.    | 2020 | Effect of a deep-learning computer-aided detection system on adenoma detection during colonoscopy (CADE-DB trial): a double-blind randomised study | China         | Gastroente<br>rology | Adenom<br>a      | 1046 | AI-aided<br>colonoscopy   | Sham                                 | Double | Adenoma<br>detection<br>rate                 | ChiCTR1800<br>017675 |
| 10. | Persell, et al. | 2020 | Effect of Home Blood Pressure Monitoring via a Smartphone Hypertension Coaching                                                                    | United States | Medicine             | Hyperten<br>sion | 333  | AI-driven<br>coaching app | Blood<br>pressure<br>tracking<br>app | None   | Systolic<br>blood<br>pressure at<br>6 months | NCT0328814<br>2      |

|     |                       |      |                                                                                                                                                               |                 |            |                                        |    |                                                                           |                  |      |                                                                          |                 |
|-----|-----------------------|------|---------------------------------------------------------------------------------------------------------------------------------------------------------------|-----------------|------------|----------------------------------------|----|---------------------------------------------------------------------------|------------------|------|--------------------------------------------------------------------------|-----------------|
|     |                       |      | Application or Tracking Application on Adults With Uncontrolled Hypertension A Randomized Clinical Trial                                                      |                 |            |                                        |    |                                                                           |                  |      |                                                                          |                 |
| 11. | Wijnberg<br>e, et al. | 2020 | Effect of a Machine Learning-Derived Early Warning System for Intraoperative Hypotension vs Standard Care on Depth and Duration of Intraoperative Hypotension | Netherl<br>ands | Cardiology | Intra-<br>operative<br>hypotens<br>ion | 68 | AI-driven<br>early warning<br>system for<br>intraoperative<br>hypotension | Standard<br>care | None | Time-<br>weighted<br>average of<br>intraoperat<br>ive<br>hypotensio<br>n | NCT0337634<br>7 |



1  
2  
3  
4  
5  
6  
7  
8  
9  
10  
11  
12  
13  
14  
15  
16  
17  
18  
19  
20  
21  
22  
23  
24  
25  
26  
27  
28  
29  
30  
31  
32  
33  
34  
35  
36  
37  
38  
39  
40  
41  
42  
43  
44  
45  
46

|     |               |      |                                                                                                            |                |               |                   |     |                                       |                       |        |                                                                       |             |
|-----|---------------|------|------------------------------------------------------------------------------------------------------------|----------------|---------------|-------------------|-----|---------------------------------------|-----------------------|--------|-----------------------------------------------------------------------|-------------|
|     |               |      | During Elective<br>Noncardiac Surgery<br>The HYPE<br>Randomized<br>Clinical Trial                          |                |               |                   |     |                                       |                       |        |                                                                       |             |
| 12. | Pavel, et al. | 2020 | A machine-learning algorithm for neonatal seizure recognition: a multicentre, randomised, controlled trial | United Kingdom | Neurology     | Neonatal seizures | 264 | Automated seizure detection algorithm | Conventional EEG      | Single | Diagnostic accuracy of healthcare professionals with aid of algorithm | NCT02431780 |
| 13. | Nimri, et al. | 2020 | Insulin dose optimization using an automated artificial intelligence-based decision support                | Israel         | Endocrinology | Diabetes          | 108 | AI-based decision support system      | Physician guided care | Single | Time of glucose level within target range                             | NCT03003806 |

|     |              |      |                                                                                                                                  |       |                  |         |     |                      |                        |        |                        |                  |
|-----|--------------|------|----------------------------------------------------------------------------------------------------------------------------------|-------|------------------|---------|-----|----------------------|------------------------|--------|------------------------|------------------|
|     |              |      | system in youths with type 1 diabetes                                                                                            |       |                  |         |     |                      |                        |        |                        |                  |
| 14. | Liu, et al.  | 2020 | The single-monitor trial: an embedded CADe system increased adenoma detection during colonoscopy: a prospective randomized study | China | Gastroenterology | Adenoma | 790 | AI-aided colonoscopy | Routine colonoscopy    | None   | Adenoma detection rate | ChiCTR1800018058 |
| 15. | Gong, et al. | 2020 | Detection of colorectal adenomas with a real-time computer-aided system (ENDOANGEL): a randomised                                | China | Gastroenterology | Adenoma | 704 | AI-aided colonoscopy | Unassisted colonoscopy | Single | Adenoma detection rate | ChiCTR1900021984 |

1  
2  
3  
4  
5  
6  
7  
8  
9  
10  
11  
12  
13  
14  
15  
16  
17  
18  
19  
20  
21  
22  
23  
24  
25  
26  
27  
28  
29  
30  
31  
32  
33  
34  
35  
36  
37  
38  
39  
40  
41  
42  
43  
44  
45  
46

|     |              |      |                                                                                                                               |       |                  |                             |     |                            |                     |      |                      |                         |
|-----|--------------|------|-------------------------------------------------------------------------------------------------------------------------------|-------|------------------|-----------------------------|-----|----------------------------|---------------------|------|----------------------|-------------------------|
|     |              |      | controlled study                                                                                                              |       |                  |                             |     |                            |                     |      |                      |                         |
| 16. | Luo, et al.  | 2020 | Artificial Intelligence-Assisted Colonoscopy for Detection of Colon Polyps: a Prospective, Randomized Cohort Study            | China | Gastroenterology | Polyps                      | 150 | AI-aided colonoscopy       | Unaided colonoscopy | None | Polyp detection rate | NCT0471262<br>65        |
| 17. | Anan, et al. | 2021 | Effects of an Artificial Intelligence-Assisted Health Program on Workers With Neck/Shoulder Pain/Stiffness and Low Back Pain: | Japan | Orthopaedics     | Neck/shoulder and back pain | 94  | AI-assisted health program | Usual care routine  | None | Pain level           | (UMIN-CTR)<br>000033894 |

|     |                  |      |                                                                                                                                                                |         |            |                |     |                           |                          |        |                                      |             |
|-----|------------------|------|----------------------------------------------------------------------------------------------------------------------------------------------------------------|---------|------------|----------------|-----|---------------------------|--------------------------|--------|--------------------------------------|-------------|
|     |                  |      | Randomized<br>Controlled Trial                                                                                                                                 |         |            |                |     |                           |                          |        |                                      |             |
| 18. | Blomberg, et al. | 2021 | Effect of Machine Learning on Dispatcher Recognition of Out-of-Hospital Cardiac Arrest During Calls to Emergency Medical Services: A Randomized Clinical Trial | Denmark | Cardiology | Cardiac arrest | 654 | AI-led alerts             | Normal protocol          | Double | Recognition of cardiac arrest        | NCT04219306 |
| 19. | Chen, et al.     | 2021 | The Role of Deep Learning-Based Echocardiography in the Diagnosis and Evaluation of the Effects of Routine Anti-Heart-                                         | China   | Cardiology | Heart failure  | 80  | AI-based echocardiography | Routine echocardiography | None   | Mortality and rehospitalization rate | NR          |

1  
2  
3  
4  
5  
6  
7  
8  
9  
10  
11  
12  
13  
14  
15  
16  
17  
18  
19  
20  
21  
22  
23  
24  
25  
26  
27  
28  
29  
30  
31  
32  
33  
34  
35  
36  
37  
38  
39  
40  
41  
42  
43  
44  
45  
46

|     |                |      |                                                                                                   |               |           |                            |      |                                    |                       |        |                                                   |               |
|-----|----------------|------|---------------------------------------------------------------------------------------------------|---------------|-----------|----------------------------|------|------------------------------------|-----------------------|--------|---------------------------------------------------|---------------|
|     |                |      | Failure Western Medicines in Elderly Patients with Acute Left Heart Failure                       |               |           |                            |      |                                    |                       |        |                                                   |               |
| 20. | Eng, et al.    | 2021 | Artificial Intelligence Algorithm Improves Radiologist Performance in Skeletal Age Assessment     | United States | Radiology | Skeletal age               | 1903 | AI diagnostic aid                  | Without aid           | None   | Mean absolute difference between the skeletal age | NCT03530098   |
| 21. | Harada, et al. | 2021 | Efficacy of artificial-intelligence-driven differential-diagnosis list on the diagnostic accuracy | Japan         | Medicine  | Various medical conditions | 22   | AI-assisted differential diagnosis | Without AI assistance | Single | Diagnostic accuracy                               | UMIN000042881 |

|     |                   |      |                                                                                                                          |               |              |                        |     |                                 |                      |        |                          |             |
|-----|-------------------|------|--------------------------------------------------------------------------------------------------------------------------|---------------|--------------|------------------------|-----|---------------------------------|----------------------|--------|--------------------------|-------------|
|     |                   |      | of physicians: An open-label randomized controlled study                                                                 |               |              |                        |     |                                 |                      |        |                          |             |
| 22. | Hassoon, et al.   | 2021 | Randomized trial of two artificial intelligence coaching interventions to increase physical activity in cancer survivors | United States | Oncology     | Different cancer types | 42  | AI coaching                     | Written information  | Single | Change in steps per day  | NCT03212079 |
| 23. | Jayakumar, et al. | 2021 | Comparison of an Artificial Intelligence-Enabled Patient Decision Aid vs Educational Material on                         | United States | Orthopaedics | Osteoarthritis         | 129 | AI-enabled patient decision aid | Educational material | None   | Knee OA Decision Quality | NCT03956004 |

1  
2  
3  
4  
5  
6  
7  
8  
9  
10  
11  
12  
13  
14  
15  
16  
17  
18  
19  
20  
21  
22  
23  
24  
25  
26  
27  
28  
29  
30  
31  
32  
33  
34  
35  
36  
37  
38  
39  
40  
41  
42  
43  
44  
45  
46

|     |                  |      |                                                                                                                                                                                   |       |                      |             |     |                         |                            |      |                      |                    |
|-----|------------------|------|-----------------------------------------------------------------------------------------------------------------------------------------------------------------------------------|-------|----------------------|-------------|-----|-------------------------|----------------------------|------|----------------------|--------------------|
|     |                  |      | Decision Quality,<br>Shared Decision-<br>Making, Patient<br>Experience, and<br>Functional<br>Outcomes in Adults<br>with Knee<br>Osteoarthritis: A<br>Randomized<br>Clinical Trial |       |                      |             |     |                         |                            |      |                      |                    |
| 24. | Kamba,<br>et al. | 2021 | Reducing adenoma<br>miss rate of<br>colonoscopy<br>assisted by artificial<br>intelligence: a<br>multicenter<br>randomized<br>controlled trial                                     | Japan | Gastroente<br>rology | Adenom<br>a | 358 | AI-aided<br>colonoscopy | Unaided<br>colonosc<br>opy | None | Adenoma<br>miss rate | jRCTs032190<br>061 |

|     |                |      |                                                                                                                                                                                       |               |            |                                          |    |                                         |                        |        |                             |                |
|-----|----------------|------|---------------------------------------------------------------------------------------------------------------------------------------------------------------------------------------|---------------|------------|------------------------------------------|----|-----------------------------------------|------------------------|--------|-----------------------------|----------------|
| 25. | Luna, et al.   | 2021 | Artificial intelligence application versus physical therapist for squat evaluation: a randomized controlled trial                                                                     | United States | Medicine   | Physical therapy                         | 30 | AI-assisted exercise application        | Unassisted exercise    | Single | Successful squats           | NCT04624594    |
| 26. | Medina, et al. | 2021 | Electrophysiological brain changes associated with cognitive improvement in a pediatric attention deficit hyperactivity disorder digital artificial intelligence-driven intervention: | Spain         | Psychiatry | Attention deficit hyperactivity disorder | 29 | AI-driven cognitive stimulation program | Commercial video games | Single | Conners CPT (CPT-III) score | ISRCTN71041318 |



1  
2  
3  
4  
5  
6  
7  
8  
9  
10  
11  
12  
13  
14  
15  
16  
17  
18  
19  
20  
21  
22  
23  
24  
25  
26  
27  
28  
29  
30  
31  
32  
33  
34  
35  
36  
37  
38  
39  
40  
41  
42  
43  
44  
45  
46

|     |                   |      |                                                                                                                            |               |                  |                             |     |                                    |                                  |      |                                    |                  |
|-----|-------------------|------|----------------------------------------------------------------------------------------------------------------------------|---------------|------------------|-----------------------------|-----|------------------------------------|----------------------------------|------|------------------------------------|------------------|
|     |                   |      | Randomized controlled trial                                                                                                |               |                  |                             |     |                                    |                                  |      |                                    |                  |
| 27. | Mertens, et al.   | 2021 | Artificial intelligence for caries detection: Randomized trial                                                             | Germany       | Dentistry        | Caries                      | 22  | AI-based diagnostic support        | Unaided diagnosis                | None | Accuracy metrics                   | DRKS000223<br>57 |
| 28. | Prochaska, et al. | 2021 | A randomized controlled trial of a therapeutic relational agent for reducing substance misuse during the COVID-19 pandemic | United States | Medicine         | Substance-related disorders | 180 | AI relational conversational agent | No intervention during the study | None | Past-month substance use occasions | NCT04096001      |
| 29. | Rafferty, et al.  | 2021 | A novel mobile app (heali) for disease treatment in participants with irritable bowel                                      | United States | Gastroenterology | Irritable bowel syndrome    | 58  | AI dietary mobile app              | Educational material             | None | Quality of life score              | NCT04256551      |

|     |                 |      |                                                                                                                                                                                                               |                  |                   |                      |     |                                    |                         |        |                                                                |                 |
|-----|-----------------|------|---------------------------------------------------------------------------------------------------------------------------------------------------------------------------------------------------------------|------------------|-------------------|----------------------|-----|------------------------------------|-------------------------|--------|----------------------------------------------------------------|-----------------|
|     |                 |      | syndrome:<br>Randomized<br>controlled pilot trial                                                                                                                                                             |                  |                   |                      |     |                                    |                         |        |                                                                |                 |
| 30. | Seok, et<br>al. | 2021 | A personalized 3d-<br>printed model for<br>obtaining informed<br>consent process for<br>thyroid surgery: A<br>randomized clinical<br>study using a deep<br>learning approach<br>with mesh-type 3d<br>modeling | Korea            | Endocrinol<br>ogy | Thyroid<br>lesions   | 53  | AI 3D-printed<br>thyroid model     | Without<br>model        | None   | Patient<br>general<br>knowledge<br>and<br>satisfactio<br>n     | KCT0005069      |
| 31. | Seol, et<br>al. | 2021 | Artificial<br>intelligence-assisted<br>clinical decision<br>support for<br>childhood asthma<br>management: A                                                                                                  | United<br>States | Paediatrics       | Childhoo<br>d asthma | 184 | AI-assisted<br>decision<br>support | Usual<br>asthma<br>care | Single | Asthma<br>exacerbati<br>on<br>occurrence<br>within one<br>year | NCT0286596<br>7 |

1  
2  
3  
4  
5  
6  
7  
8  
9  
10  
11  
12  
13  
14  
15  
16  
17  
18  
19  
20  
21  
22  
23  
24  
25  
26  
27  
28  
29  
30  
31  
32  
33  
34  
35  
36  
37  
38  
39  
40  
41  
42  
43  
44  
45  
46

|     |                   |      |                                                                                                                                                      |               |             |                                       |     |                                  |                             |      |                                      |             |
|-----|-------------------|------|------------------------------------------------------------------------------------------------------------------------------------------------------|---------------|-------------|---------------------------------------|-----|----------------------------------|-----------------------------|------|--------------------------------------|-------------|
|     |                   |      | randomized clinical trial                                                                                                                            |               |             |                                       |     |                                  |                             |      |                                      |             |
| 32. | Stromblad, et al. | 2021 | Effect of a Predictive Model on Planned Surgical Duration Accuracy, Patient Wait Time, and Use of Presurgical Resources: A Randomized Clinical Trial | United States | Surgery     | Gynaecological and colorectal surgery | 683 | AI-assisted surgical predictions | Standard estimation process | None | Accurate surgery duration prediction | NCT03471377 |
| 33. | Turino, et al.    | 2021 | Management and treatment of patients with obstructive sleep apnea using an intelligent monitoring system                                             | Spain         | Pulmonology | Obstructive sleep apnea               | 60  | Intelligent monitoring system    | Standard management         | None | Compliance to CPAP                   | NCT03116958 |

|     |              |      |                                                                                                                                                                  |       |                  |                      |    |                                            |                 |      |                                        |    |
|-----|--------------|------|------------------------------------------------------------------------------------------------------------------------------------------------------------------|-------|------------------|----------------------|----|--------------------------------------------|-----------------|------|----------------------------------------|----|
|     |              |      | based on machine learning aiming to improve continuous positive airway pressure treatment compliance:<br>Randomized controlled trial                             |       |                  |                      |    |                                            |                 |      |                                        |    |
| 34. | Wang, et al. | 2021 | Utilization of Ultrasonic Image Characteristics Combined with Endoscopic Detection on the Basis of Artificial Intelligence Algorithm in Diagnosis of Early Upper | China | Gastroenterology | Early gastric cancer | 80 | Endoscopy with AI-based ultrasound imaging | Endoscopy alone | None | Detection rate of upper gastric cancer | NR |

1  
2  
3  
4  
5  
6  
7  
8  
9  
10  
11  
12  
13  
14  
15  
16  
17  
18  
19  
20  
21  
22  
23  
24  
25  
26  
27  
28  
29  
30  
31  
32  
33  
34  
35  
36  
37  
38  
39  
40  
41  
42  
43  
44  
45  
46

1  
2  
3  
4  
5  
6  
7  
8  
9  
10  
11  
12  
13  
14  
15  
16  
17  
18  
19  
20  
21  
22  
23  
24  
25  
26  
27  
28  
29  
30  
31  
32  
33  
34  
35  
36  
37  
38  
39  
40  
41  
42  
43  
44  
45  
46

|     |            |      |                                                                                                                                                                                                 |       |                  |                      |      |                       |                   |        |                                        |                  |
|-----|------------|------|-------------------------------------------------------------------------------------------------------------------------------------------------------------------------------------------------|-------|------------------|----------------------|------|-----------------------|-------------------|--------|----------------------------------------|------------------|
|     |            |      | Gastrointestinal<br>Cancer                                                                                                                                                                      |       |                  |                      |      |                       |                   |        |                                        |                  |
| 35. | Wu, et al. | 2021 | Evaluation of the effects of an artificial intelligence system on endoscopy quality and preliminary testing of its performance in detecting early gastric cancer: a randomized controlled trial | China | Gastroenterology | Early gastric cancer | 1050 | AI-aided endoscopy    | Endoscopy alone   | Single | Number of blind spots during endoscopy | ChiCTR1800018403 |
| 36. | Wu, et al. | 2021 | Effect of a deep learning-based system on the miss rate of gastric neoplasms during                                                                                                             | China | Gastroenterology | Gastric neoplasm     | 1886 | AI-assisted endoscopy | Unaided endoscopy | Single | Gastric neoplasm miss rate             | ChiCTR2000034453 |

|     |            |      |                                                                                                                          |       |                  |                  |      |                           |                          |      |                      |                  |
|-----|------------|------|--------------------------------------------------------------------------------------------------------------------------|-------|------------------|------------------|------|---------------------------|--------------------------|------|----------------------|------------------|
|     |            |      | upper gastrointestinal endoscopy: a single-centre, tandem, randomised controlled trial                                   |       |                  |                  |      |                           |                          |      |                      |                  |
| 37. | Xu, et al. | 2021 | The Clinical Value of Explainable Deep Learning for Diagnosing Fungal Keratitis Using in vivo Confocal Microscopy Images | China | Ophthalmology    | Fungal keratitis | 1089 | AI-assisted image reading | Unassisted image reading | None | Accuracy             | NR               |
| 38. | Xu, et al. | 2021 | Artificial intelligence-assisted colonoscopy: A prospective, multicenter, randomized                                     | China | Gastroenterology | Polyp            | 2352 | AI-assisted colonoscopy   | Conventional colonoscopy | None | Polyp detection rate | ChiCTR1800015607 |

1  
2  
3  
4  
5  
6  
7  
8  
9  
10  
11  
12  
13  
14  
15  
16  
17  
18  
19  
20  
21  
22  
23  
24  
25  
26  
27  
28  
29  
30  
31  
32  
33  
34  
35  
36  
37  
38  
39  
40  
41  
42  
43  
44  
45  
46

|     |              |      |                                                                                                                                                      |               |            |                          |     |                                                        |                    |      |                                        |             |
|-----|--------------|------|------------------------------------------------------------------------------------------------------------------------------------------------------|---------------|------------|--------------------------|-----|--------------------------------------------------------|--------------------|------|----------------------------------------|-------------|
|     |              |      | controlled trial of polyp detection                                                                                                                  |               |            |                          |     |                                                        |                    |      |                                        |             |
| 39. | Yao, et al.  | 2021 | Artificial intelligence-enabled electrocardiograms for identification of patients with low ejection fraction: a pragmatic, randomized clinical trial | United States | Cardiology | Low ejection fraction    | 358 | AI-enabled electrocardiograms                          | Usual care         | None | New diagnosis of low ejection fraction | NCT04000087 |
| 40. | Zeng, et al. | 2021 | Long-Term Assessment of Rehabilitation Treatment of Sports through Artificial Intelligence Research                                                  | China         | Medicine   | Sports health management | 150 | AI-based personalized sports management service system | General management | None | Blood glucose, blood pressure, lipids  | NR          |

|     |               |      |                                                                                                                                                   |       |             |                |    |                                        |                    |        |                                                                        |    |
|-----|---------------|------|---------------------------------------------------------------------------------------------------------------------------------------------------|-------|-------------|----------------|----|----------------------------------------|--------------------|--------|------------------------------------------------------------------------|----|
| 41. | Zhang, et al. | 2021 | Artificial Intelligence Algorithm-Based Ultrasound Image Segmentation Technology in the Diagnosis of Breast Cancer Axillary Lymph Node Metastasis | China | Oncology    | Breast cancer  | 90 | AI-based ultrasound image segmentation | Routine ultrasound | Double | Accuracy metrics                                                       | NR |
| 42. | Zhang, et al. | 2021 | Value of Rehabilitation Training for Children with Cerebral Palsy Diagnosed and Analyzed by Computed Tomography                                   | China | Paediatrics | Cerebral palsy | 73 | AI-assisted analysis of brain images   | Original images    | None   | Cerebral artery blood flow velocity (VP) and Vascular pulse index (PI) | NR |



1  
2  
3  
4  
5  
6  
7  
8  
9  
10  
11  
12  
13  
14  
15  
16  
17  
18  
19  
20  
21  
22  
23  
24  
25  
26  
27  
28  
29  
30  
31  
32  
33  
34  
35  
36  
37  
38  
39  
40  
41  
42  
43  
44  
45  
46

|  |  |  |                |  |  |  |  |  |  |  |  |  |
|--|--|--|----------------|--|--|--|--|--|--|--|--|--|
|  |  |  | Imaging        |  |  |  |  |  |  |  |  |  |
|  |  |  | Information    |  |  |  |  |  |  |  |  |  |
|  |  |  | Features under |  |  |  |  |  |  |  |  |  |
|  |  |  | Deep Learning  |  |  |  |  |  |  |  |  |  |

1. Sadasivam RS, Borglund EM, Adams R, Marlin BM, Houston TK. Impact of a collective intelligence tailored messaging system on smoking cessation: the Perspect randomized experiment. *JMIR* 2016;18(11):e285.
2. Morrison LG, Hargood C, Pejovic V, Geraghty AW, Lloyd S, Goodman N, et al. The effect of timing and frequency of push notifications on usage of a smartphone-based stress management intervention: an exploratory trial. *PloS one* 2017;12(1):e0169162.
3. Labovitz DL, Shafner L, Reyes Gil M, Virmani D, Hanina A. Using artificial intelligence to reduce the risk of nonadherence in patients on anticoagulation therapy. *Stroke* 2017;48(5):1416-9.
4. Rostill H, Nilforooshan R, Morgan A, Barnaghi P, Ream E, Chrysanthaki T. Technology integrated health management for dementia. *Br J Community Nurs* 2018;23(10):502-8.
5. Wang P, Berzin TM, Brown JRG, Bharadwaj S, Becq A, Xiao X, et al. Real-time automatic detection system increases colonoscopic polyp and adenoma detection rates: a prospective randomised controlled study. *Gut* 2019;68(10):1813-9.

- 1  
2  
3 6. Lin H, Li R, Liu Z, Chen J, Yang Y, Chen H, et al. Diagnostic efficacy and therapeutic decision-making capacity of an artificial  
4 intelligence platform for childhood cataracts in eye clinics: a multicentre randomized controlled trial. *EClinicalMedicine* 2019; 9: 52–  
5  
6 9.  
7
- 8  
9  
10 7. Voss C, Schwartz J, Daniels J, Kline A, Haber N, Washington P, et al. Effect of wearable digital intervention for improving  
11 socialization in children with autism spectrum disorder: a randomized clinical trial. *JAMA Pediatr* 2019;173(5):446-54.  
12
- 13 8. Wu L, Zhang J, Zhou W, An P, Shen L, Liu J, et al. Randomised controlled trial of WISENSE, a real-time quality improving system  
14 for monitoring blind spots during esophagogastroduodenoscopy. *Gut* 2019;68(12):2161-9.  
15
- 16 9. Wang P, Liu X, Berzin TM, Brown JRG, Liu P, Zhou C, et al. Effect of a deep-learning computer-aided detection system on  
17 adenoma detection during colonoscopy (CADe-DB trial): a double-blind randomised study. *Lancet Gastroenterol Hepatol*  
18 2020;5(4):343-51.  
19
- 20 10. Persell SD, Peprah YA, Lipiszko D, Lee JY, Li JJ, Ciolino JD, et al. Effect of home blood pressure monitoring via a smartphone  
21 hypertension coaching application or tracking application on adults with uncontrolled hypertension: a randomized clinical trial. *JAMA*  
22 *Netw Open* 2020;3(3):e200255-e.  
23
- 24 11. Wijnberge M, Geerts BF, Hol L, Lemmers N, Mulder MP, Berge P, et al. Effect of a machine learning–derived early warning system  
25 for intraoperative hypotension vs standard care on depth and duration of intraoperative hypotension during elective noncardiac  
26 surgery: the HYPE randomized clinical trial. *JAMA* 2020;323(11):1052-60.  
27  
28  
29  
30  
31  
32  
33  
34  
35  
36  
37  
38  
39  
40  
41  
42  
43  
44  
45  
46

- 1  
2  
3 12. Pavel AM, Rennie JM, de Vries LS, Blennow M, Foran A, Shah DK, et al. A machine-learning algorithm for neonatal seizure  
4 recognition: a multicentre, randomised, controlled trial. *The Lancet Child & Adolescent Health* 2020;4(10):740-9.  
5  
6  
7  
8 13. Nimri R, Battelino T, Laffel LM, Slover RH, Schatz D, Weinzimer SA, et al. Insulin dose optimization using an automated artificial  
9 intelligence-based decision support system in youths with type 1 diabetes. *Nature medicine* 2020;26(9):1380-4.  
10  
11  
12 14. Liu P, Wang P, Glissen Brown JR, Berzin TM, Zhou G, Liu W, et al. The single-monitor trial: an embedded CAde system increased  
13 adenoma detection during colonoscopy: a prospective randomized study. *Therap Adv Gastroenterol* 2020;13:1756284820979165.  
14  
15  
16  
17 15. Gong D, Wu L, Zhang J, Mu G, Shen L, Liu J, et al. Detection of colorectal adenomas with a real-time computer-aided system  
18 (ENDOANGEL): a randomised controlled study. *Lancet Gastroenterol Hepatol* 2020;5(4):352-61.  
19  
20  
21  
22 16. Luo Y, Zhang Y, Liu M, Lai Y, Liu P, Wang Z, Xing T, Huang Y, Li Y, Li A, Wang Y. Artificial intelligence-assisted colonoscopy  
23 for detection of colon polyps: a prospective, randomized cohort study. *Journal of Gastrointestinal Surgery* 2021;25(8):2011-8.  
24  
25  
26  
27 17. Anan T, Kajiki S, Oka H, et al. Effects of an Artificial Intelligence-Assisted Health Program on Workers With Neck/Shoulder  
28 Pain/Stiffness and Low Back Pain: Randomized Controlled Trial. *JMIR Mhealth Uhealth* 2021;9(9):e27535.  
29  
30  
31 18. 1. Blomberg SN, Christensen HC, Lippert F, et al. Effect of Machine Learning on Dispatcher Recognition of Out-of-Hospital Cardiac Arrest  
32 During Calls to Emergency Medical Services: A Randomized Clinical Trial. *JAMA Netw Open* 2021;4(1):e2032320.  
33  
34  
35  
36 19. Chen J, Gao Y. The Role of Deep Learning-Based Echocardiography in the Diagnosis and Evaluation of the Effects of Routine Anti-Heart-  
37 Failure Western Medicines in Elderly Patients with Acute Left Heart Failure. *Journal of Healthcare Engineering* 2021;2021  
38  
39  
40  
41  
42  
43  
44  
45  
46

- 1  
2  
3  
4  
5  
6  
7  
8  
9  
10  
11  
12  
13  
14  
15  
16  
17  
18  
19  
20  
21  
22  
23  
24  
25  
26  
27  
28  
29  
30  
31  
32  
33  
34  
35  
36  
37  
38  
39  
40  
41  
42  
43  
44  
45  
46
20. Eng DK, Khandwala NB, Long J, et al. Artificial intelligence algorithm improves radiologist performance in skeletal age assessment: A prospective multicenter randomized controlled trial. *Radiology* 2021;301(3):692-99.
  21. Harada Y, Katsukura S, Kawamura R, et al. Efficacy of artificial-intelligence-driven differential-diagnosis list on the diagnostic accuracy of physicians: An open-label randomized controlled study. *International Journal of Environmental Research and Public Health* 2021;18(4):1-10.
  22. Hassoon A, Baig Y, Naiman DQ, et al. Randomized trial of two artificial intelligence coaching interventions to increase physical activity in cancer survivors. *npj Digital Medicine* 2021;4(1)
  23. Jayakumar P, Moore MG, Furlough KA, et al. Comparison of an Artificial Intelligence-Enabled Patient Decision Aid vs Educational Material on Decision Quality, Shared Decision-Making, Patient Experience, and Functional Outcomes in Adults with Knee Osteoarthritis: A Randomized Clinical Trial. *JAMA Network Open* 2021;4(2)
  24. Kamba S, Tamai N, Saitoh I, et al. Reducing adenoma miss rate of colonoscopy assisted by artificial intelligence: a multicenter randomized controlled trial. *Journal of Gastroenterology* 2021;56(8):746-57.
  25. Luna A, Casertano L, Timmerberg J, et al. Artificial intelligence application versus physical therapist for squat evaluation: a randomized controlled trial. *Scientific reports* 2021;11(1):18109.

- 1  
2  
3 26. Medina R, Bouhaben J, de Ramon I, et al. Electrophysiological brain changes associated with cognitive improvement in a pediatric attention  
4 deficit hyperactivity disorder digital artificial intelligence-driven intervention: Randomized controlled trial. *Journal of Medical Internet*  
5  
6 *Research* 2021;23(11)  
7  
8  
9  
10 27. Mertens S, Krois J, Cantu AG, et al. Artificial intelligence for caries detection: Randomized trial. *J Dent* 2021;115:103849.  
11  
12 28. Prochaska JJ, Vogel EA, Chieng A, et al. A randomized controlled trial of a therapeutic relational agent for reducing substance misuse  
13 during the COVID-19 pandemic. *Drug and Alcohol Dependence* 2021;227  
14  
15  
16  
17 29. Rafferty AJ, Hall R, Johnston CS. A novel mobile app (heali) for disease treatment in participants with irritable bowel syndrome:  
18 Randomized controlled pilot trial. *Journal of Medical Internet Research* 2021;23(3)  
19  
20  
21 30. Seok J, Yoon S, Ryu CH, et al. A personalized 3d-printed model for obtaining informed consent process for thyroid surgery: A randomized  
22 clinical study using a deep learning approach with mesh-type 3d modeling. *Journal of Personalized Medicine* 2021;11(6)  
23  
24  
25  
26 31. Seol HY, Shrestha P, Muth JF, et al. Artificial intelligence-assisted clinical decision support for childhood asthma management: A  
27 randomized clinical trial. *PLoS ONE* 2021;16(8 August)  
28  
29  
30  
31 32. Stromblad CT, Baxter-King RG, Meisami A, et al. Effect of a Predictive Model on Planned Surgical Duration Accuracy, Patient Wait Time,  
32 and Use of Presurgical Resources: A Randomized Clinical Trial. *JAMA Surgery* 2021;156(4):315-21.  
33  
34  
35  
36  
37  
38  
39  
40  
41  
42  
43  
44  
45  
46

- 1  
2  
3  
4  
5  
6  
7  
8  
9  
10  
11  
12  
13  
14  
15  
16  
17  
18  
19  
20  
21  
22  
23  
24  
25  
26  
27  
28  
29  
30  
31  
32  
33  
34  
35  
36  
37  
38  
39  
40  
41  
42  
43  
44  
45  
46
33. Turino C, Benitez ID, Rafael-Palou X, et al. Management and treatment of patients with obstructive sleep apnea using an intelligent monitoring system based on machine learning aiming to improve continuous positive airway pressure treatment compliance: Randomized controlled trial. *Journal of Medical Internet Research* 2021;23(10)
  34. Wang L, Song H, Wang M, et al. Utilization of Ultrasonic Image Characteristics Combined with Endoscopic Detection on the Basis of Artificial Intelligence Algorithm in Diagnosis of Early Upper Gastrointestinal Cancer. *J Healthc Eng* 2021;2021:2773022.
  35. Wu L, He X, Liu M, et al. Evaluation of the effects of an artificial intelligence system on endoscopy quality and preliminary testing of its performance in detecting early gastric cancer: a randomized controlled trial. *Endoscopy* 2021;53(12):1199-207
  36. Wu L, Shang R, Sharma P, et al. Effect of a deep learning-based system on the miss rate of gastric neoplasms during upper gastrointestinal endoscopy: a single-centre, tandem, randomised controlled trial. *The Lancet Gastroenterology and Hepatology* 2021;6(9):700-08.
  37. Xu F, Jiang L, He W, et al. The Clinical Value of Explainable Deep Learning for Diagnosing Fungal Keratitis Using in vivo Confocal Microscopy Images. *Frontiers in Medicine* 2021;8
  38. Xu L, He X, Zhou J, et al. Artificial intelligence-assisted colonoscopy: A prospective, multicenter, randomized controlled trial of polyp detection. *Cancer Medicine* 2021;10(20):7184-93.
  39. Yao X, Rushlow DR, Inselman JW, et al. Artificial intelligence-enabled electrocardiograms for identification of patients with low ejection fraction: a pragmatic, randomized clinical trial. *Nature Medicine* 2021;27(5):815-19.
  40. Zeng C, Huang Y, Yu L, et al. Long-Term Assessment of Rehabilitation Treatment of Sports through Artificial Intelligence Research. *Comput Math Methods Med* 2021;2021:4980718.

- 1  
2  
3 41. Zhang L, Jia Z, Leng X, et al. Artificial Intelligence Algorithm-Based Ultrasound Image Segmentation Technology in the Diagnosis of  
4 Breast Cancer Axillary Lymph Node Metastasis. *J Healthc Eng* 2021;2021:8830260.  
5  
6  
7  
8 42. Zhang X, Wang Z, Liu J, et al. Value of Rehabilitation Training for Children with Cerebral Palsy Diagnosed and Analyzed by Computed  
9 Tomography Imaging Information Features under Deep Learning. *J Healthc Eng* 2021;2021:6472440.  
10  
11  
12  
13  
14  
15  
16  
17  
18  
19  
20  
21  
22  
23  
24  
25  
26  
27  
28  
29  
30  
31  
32  
33  
34  
35  
36  
37  
38  
39  
40  
41  
42  
43  
44  
45  
46

For peer review only

1  
2  
3 **Search Strategy:**  
4  
5

6 **FOR EMBASE:**  
7

- 8  
9 1) \*deep learning/  
10  
11 2) \*artificial intelligence/  
12  
13 3) \*machine learning/  
14  
15 4) 1 or 2 or 3  
16  
17

18  
19 **For PubMed:**  
20

- 21  
22 1. Artificial intelligence  
23  
24 2. Machine learning  
25  
26 3. Deep learning  
27  
28 4. 1 OR 2 OR 3  
29  
30

31  
32 **Restricted to:**  
33

- 34  
35 • Article type: Randomized Control Trial  
36  
37 • Publication Date: 1/01/2015 to 31/12/2021  
38  
39 • Species: Human  
40  
41 • Language: English  
42  
43  
44  
45  
46  
47  
48  
49  
50  
51  
52  
53  
54  
55  
56  
57  
58  
59  
60



# Reporting checklist for systematic review (with or without a meta-analysis).

Based on the PRISMA guidelines.

## Instructions to authors

Complete this checklist by entering the page numbers from your manuscript where readers will find each of the items listed below.

Your article may not currently address all the items on the checklist. Please modify your text to include the missing information. If you are certain that an item does not apply, please write "n/a" and provide a short explanation.

Upload your completed checklist as an extra file when you submit to a journal.

In your methods section, say that you used the PRISMA reporting guidelines, and cite them as:

Page MJ, McKenzie JE, Bossuyt PM, Boutron I, Hoffmann TC, Mulrow CD, Shamseer L, Tetzlaff JM, Akl EA, Brennan SE, Chou R, Glanville J, Grimshaw JM, Hróbjartsson A, Lalu MM, Li T, Loder EW, Mayo-Wilson E, McDonald S, McGuinness LA, Stewart LA, Thomas J, Tricco AC, Welch VA, Whiting P, Moher D. The PRISMA 2020 statement: An updated guideline for reporting systematic reviews

|                      | Reporting Item                                                                                           | Page Number |
|----------------------|----------------------------------------------------------------------------------------------------------|-------------|
| <b>Title</b>         |                                                                                                          |             |
| Title                | <a href="#">#1</a> Identify the report as a systematic review                                            | 1           |
| <b>Abstract</b>      |                                                                                                          |             |
| Abstract             | <a href="#">#2</a> Report an abstract addressing each item in the PRISMA 2020 for Abstracts checklist    | 3           |
| <b>Introduction</b>  |                                                                                                          |             |
| Background/rationale | <a href="#">#3</a> Describe the rationale for the review in the context of existing knowledge            | 4           |
| Objectives           | <a href="#">#4</a> Provide an explicit statement of the objective(s) or question(s) the review addresses | 5           |

## Methods

|    |                               |                      |                                                                                                                                                                                                                                                                                                      |     |
|----|-------------------------------|----------------------|------------------------------------------------------------------------------------------------------------------------------------------------------------------------------------------------------------------------------------------------------------------------------------------------------|-----|
| 1  | Eligibility criteria          | <a href="#">#5</a>   | Specify the inclusion and exclusion criteria for the review and how studies were grouped for the syntheses                                                                                                                                                                                           | 6   |
| 2  |                               |                      |                                                                                                                                                                                                                                                                                                      |     |
| 3  |                               |                      |                                                                                                                                                                                                                                                                                                      |     |
| 4  | Information sources           | <a href="#">#6</a>   | Specify all databases, registers, websites, organisations, reference lists, and other sources searched or consulted to identify studies. Specify the date when each source was last searched or consulted                                                                                            | 6   |
| 5  |                               |                      |                                                                                                                                                                                                                                                                                                      |     |
| 6  |                               |                      |                                                                                                                                                                                                                                                                                                      |     |
| 7  |                               |                      |                                                                                                                                                                                                                                                                                                      |     |
| 8  |                               |                      |                                                                                                                                                                                                                                                                                                      |     |
| 9  |                               |                      |                                                                                                                                                                                                                                                                                                      |     |
| 10 |                               |                      |                                                                                                                                                                                                                                                                                                      |     |
| 11 | Search strategy               | <a href="#">#7</a>   | Present the full search strategies for all databases, registers, and websites, including any filters and limits used                                                                                                                                                                                 | 6   |
| 12 |                               |                      |                                                                                                                                                                                                                                                                                                      |     |
| 13 |                               |                      |                                                                                                                                                                                                                                                                                                      |     |
| 14 |                               |                      |                                                                                                                                                                                                                                                                                                      |     |
| 15 | Selection process             | <a href="#">#8</a>   | Specify the methods used to decide whether a study met the inclusion criteria of the review, including how many reviewers screened each record and each report retrieved, whether they worked independently, and, if applicable, details of automation tools used in the process                     | 6   |
| 16 |                               |                      |                                                                                                                                                                                                                                                                                                      |     |
| 17 |                               |                      |                                                                                                                                                                                                                                                                                                      |     |
| 18 |                               |                      |                                                                                                                                                                                                                                                                                                      |     |
| 19 |                               |                      |                                                                                                                                                                                                                                                                                                      |     |
| 20 |                               |                      |                                                                                                                                                                                                                                                                                                      |     |
| 21 |                               |                      |                                                                                                                                                                                                                                                                                                      |     |
| 22 |                               |                      |                                                                                                                                                                                                                                                                                                      |     |
| 23 | Data collection process       | <a href="#">#9</a>   | Specify the methods used to collect data from reports, including how many reviewers collected data from each report, whether they worked independently, any processes for obtaining or confirming data from study investigators, and, if applicable, details of automation tools used in the process | 7   |
| 24 |                               |                      |                                                                                                                                                                                                                                                                                                      |     |
| 25 |                               |                      |                                                                                                                                                                                                                                                                                                      |     |
| 26 |                               |                      |                                                                                                                                                                                                                                                                                                      |     |
| 27 |                               |                      |                                                                                                                                                                                                                                                                                                      |     |
| 28 |                               |                      |                                                                                                                                                                                                                                                                                                      |     |
| 29 |                               |                      |                                                                                                                                                                                                                                                                                                      |     |
| 30 |                               |                      |                                                                                                                                                                                                                                                                                                      |     |
| 31 |                               |                      |                                                                                                                                                                                                                                                                                                      |     |
| 32 |                               |                      |                                                                                                                                                                                                                                                                                                      |     |
| 33 | Data items                    | <a href="#">#10a</a> | List and define all outcomes for which data were sought. Specify whether all results that were compatible with each outcome domain in each study were sought (for example, for all measures, time points, analyses), and, if not, the methods used to decide which results to collect                | 7   |
| 34 |                               |                      |                                                                                                                                                                                                                                                                                                      |     |
| 35 |                               |                      |                                                                                                                                                                                                                                                                                                      |     |
| 36 |                               |                      |                                                                                                                                                                                                                                                                                                      |     |
| 37 |                               |                      |                                                                                                                                                                                                                                                                                                      |     |
| 38 |                               |                      |                                                                                                                                                                                                                                                                                                      |     |
| 39 |                               |                      |                                                                                                                                                                                                                                                                                                      |     |
| 40 |                               |                      |                                                                                                                                                                                                                                                                                                      |     |
| 41 |                               |                      |                                                                                                                                                                                                                                                                                                      |     |
| 42 | Study risk of bias assessment | <a href="#">#11</a>  | Specify the methods used to assess risk of bias in the included studies, including details of the tool(s) used, how many reviewers assessed each study and whether they worked independently, and, if applicable, details of automation tools used in the process                                    | n/a |
| 43 |                               |                      |                                                                                                                                                                                                                                                                                                      |     |
| 44 |                               |                      |                                                                                                                                                                                                                                                                                                      |     |
| 45 |                               |                      |                                                                                                                                                                                                                                                                                                      |     |
| 46 |                               |                      |                                                                                                                                                                                                                                                                                                      |     |
| 47 |                               |                      |                                                                                                                                                                                                                                                                                                      |     |
| 48 |                               |                      |                                                                                                                                                                                                                                                                                                      |     |
| 49 |                               |                      |                                                                                                                                                                                                                                                                                                      |     |
| 50 | Effect measures               | <a href="#">#12</a>  | Specify for each outcome the effect measure(s) (such as risk ratio, mean difference) used in the synthesis or presentation of results                                                                                                                                                                | 7   |
| 51 |                               |                      |                                                                                                                                                                                                                                                                                                      |     |
| 52 |                               |                      |                                                                                                                                                                                                                                                                                                      |     |
| 53 |                               |                      |                                                                                                                                                                                                                                                                                                      |     |
| 54 |                               |                      |                                                                                                                                                                                                                                                                                                      |     |
| 55 | Synthesis methods             | <a href="#">#13a</a> | Describe the processes used to decide which studies were eligible for each synthesis (such as tabulating the study                                                                                                                                                                                   | n/a |
| 56 |                               |                      |                                                                                                                                                                                                                                                                                                      |     |
| 57 |                               |                      |                                                                                                                                                                                                                                                                                                      |     |
| 58 |                               |                      |                                                                                                                                                                                                                                                                                                      |     |
| 59 |                               |                      |                                                                                                                                                                                                                                                                                                      |     |
| 60 |                               |                      |                                                                                                                                                                                                                                                                                                      |     |

|    |                      |                                                                                                                       |     |
|----|----------------------|-----------------------------------------------------------------------------------------------------------------------|-----|
| 1  |                      | intervention characteristics and comparing against the                                                                |     |
| 2  |                      | planned groups for each synthesis (item #5))                                                                          |     |
| 3  |                      |                                                                                                                       |     |
| 4  | Synthesis methods    | <a href="#">#13b</a> Describe any methods required to prepare the data for                                            | n/a |
| 5  |                      | presentation or synthesis, such as handling of missing                                                                |     |
| 6  |                      | summary statistics or data conversions                                                                                |     |
| 7  |                      |                                                                                                                       |     |
| 8  |                      |                                                                                                                       |     |
| 9  | Synthesis methods    | <a href="#">#13c</a> Describe any methods used to tabulate or visually display                                        | n/a |
| 10 |                      | results of individual studies and syntheses                                                                           |     |
| 11 |                      |                                                                                                                       |     |
| 12 |                      |                                                                                                                       |     |
| 13 | Synthesis methods    | <a href="#">#13d</a> Describe any methods used to synthesise results and provide                                      | n/a |
| 14 |                      | a rationale for the choice(s). If meta-analysis was                                                                   |     |
| 15 |                      | performed, describe the model(s), method(s) to identify the                                                           |     |
| 16 |                      | presence and extent of statistical heterogeneity, and                                                                 |     |
| 17 |                      | software package(s) used                                                                                              |     |
| 18 |                      |                                                                                                                       |     |
| 19 |                      |                                                                                                                       |     |
| 20 |                      |                                                                                                                       |     |
| 21 | Synthesis methods    | <a href="#">#13e</a> Describe any methods used to explore possible causes of                                          | n/a |
| 22 |                      | heterogeneity among study results (such as subgroup                                                                   |     |
| 23 |                      | analysis, meta-regression)                                                                                            |     |
| 24 |                      |                                                                                                                       |     |
| 25 |                      |                                                                                                                       |     |
| 26 |                      |                                                                                                                       |     |
| 27 | Synthesis methods    | <a href="#">#13f</a> Describe any sensitivity analyses conducted to assess                                            | n/a |
| 28 |                      | robustness of the synthesised results                                                                                 |     |
| 29 |                      |                                                                                                                       |     |
| 30 | Reporting bias       | <a href="#">#14</a> Describe any methods used to assess risk of bias due to                                           | n/a |
| 31 | assessment           | missing results in a synthesis (arising from reporting biases)                                                        |     |
| 32 |                      |                                                                                                                       |     |
| 33 |                      |                                                                                                                       |     |
| 34 | Certainty assessment | <a href="#">#15</a> Describe any methods used to assess certainty (or                                                 | n/a |
| 35 |                      | confidence) in the body of evidence for an outcome                                                                    |     |
| 36 |                      |                                                                                                                       |     |
| 37 |                      |                                                                                                                       |     |
| 38 | Data items           | <a href="#">#10b</a> List and define all other variables for which data were                                          | n/a |
| 39 |                      | sought (such as participant and intervention characteristics,                                                         |     |
| 40 |                      | funding sources). Describe any assumptions made about any                                                             |     |
| 41 |                      | missing or unclear information                                                                                        |     |
| 42 |                      |                                                                                                                       |     |
| 43 |                      |                                                                                                                       |     |
| 44 |                      |                                                                                                                       |     |
| 45 | <b>Results</b>       |                                                                                                                       |     |
| 46 |                      |                                                                                                                       |     |
| 47 | Study selection      | <a href="#">#16a</a> Describe the results of the search and selection process,                                        | 7   |
| 48 |                      | from the number of records identified in the search to the                                                            |     |
| 49 |                      | number of studies included in the review, ideally using a                                                             |     |
| 50 |                      | flow diagram ( <a href="http://www.prisma-statement.org/PRISMAStatement/FlowDiagram">http://www.prisma-</a>           |     |
| 51 |                      | <a href="http://www.prisma-statement.org/PRISMAStatement/FlowDiagram">statement.org/PRISMAStatement/FlowDiagram</a> ) |     |
| 52 |                      |                                                                                                                       |     |
| 53 |                      |                                                                                                                       |     |
| 54 |                      |                                                                                                                       |     |
| 55 |                      |                                                                                                                       |     |
| 56 | Study selection      | <a href="#">#16b</a> Cite studies that might appear to meet the inclusion criteria,                                   | 7   |
| 57 |                      | but which were excluded, and explain why they were                                                                    |     |
| 58 |                      | excluded                                                                                                              |     |
| 59 |                      |                                                                                                                       |     |
| 60 |                      |                                                                                                                       |     |

|    |                         |                      |                                                                 |                          |
|----|-------------------------|----------------------|-----------------------------------------------------------------|--------------------------|
| 1  | Study characteristics   | <a href="#">#17</a>  | Cite each included study and present its characteristics        | supplementary<br>table 2 |
| 2  |                         |                      |                                                                 |                          |
| 3  |                         |                      |                                                                 |                          |
| 4  | Risk of bias in studies | <a href="#">#18</a>  | Present assessments of risk of bias for each included study     | n/a                      |
| 5  |                         |                      |                                                                 |                          |
| 6  |                         |                      |                                                                 |                          |
| 7  | Results of individual   | <a href="#">#19</a>  | For all outcomes, present for each study (a) summary            | 8                        |
| 8  | studies                 |                      | statistics for each group (where appropriate) and (b) an        |                          |
| 9  |                         |                      | effect estimate and its precision (such as                      |                          |
| 10 |                         |                      | confidence/credible interval), ideally using structured tables  |                          |
| 11 |                         |                      | or plots                                                        |                          |
| 12 |                         |                      |                                                                 |                          |
| 13 |                         |                      |                                                                 |                          |
| 14 |                         |                      |                                                                 |                          |
| 15 | Results of syntheses    | <a href="#">#20a</a> | For each synthesis, briefly summarise the characteristics       | n/a                      |
| 16 |                         |                      | and risk of bias among contributing studies                     |                          |
| 17 |                         |                      |                                                                 |                          |
| 18 |                         |                      |                                                                 |                          |
| 19 | Results of syntheses    | <a href="#">#20b</a> | Present results of all statistical syntheses conducted. If      | n/a                      |
| 20 |                         |                      | meta-analysis was done, present for each the summary            |                          |
| 21 |                         |                      | estimate and its precision (such as confidence/credible         |                          |
| 22 |                         |                      | interval) and measures of statistical heterogeneity. If         |                          |
| 23 |                         |                      | comparing groups, describe the direction of the effect          |                          |
| 24 |                         |                      |                                                                 |                          |
| 25 |                         |                      |                                                                 |                          |
| 26 |                         |                      |                                                                 |                          |
| 27 | Results of syntheses    | <a href="#">#20c</a> | Present results of all investigations of possible causes of     | n/a                      |
| 28 |                         |                      | heterogeneity among study results                               |                          |
| 29 |                         |                      |                                                                 |                          |
| 30 |                         |                      |                                                                 |                          |
| 31 | Results of syntheses    | <a href="#">#20d</a> | Present results of all sensitivity analyses conducted to assess | n/a                      |
| 32 |                         |                      | the robustness of the synthesised results                       |                          |
| 33 |                         |                      |                                                                 |                          |
| 34 |                         |                      |                                                                 |                          |
| 35 | Risk of reporting       | <a href="#">#21</a>  | Present assessments of risk of bias due to missing results      | n/a                      |
| 36 | biases in syntheses     |                      | (arising from reporting biases) for each synthesis assessed     |                          |
| 37 |                         |                      |                                                                 |                          |
| 38 |                         |                      |                                                                 |                          |
| 39 | Certainty of evidence   | <a href="#">#22</a>  | Present assessments of certainty (or confidence) in the body    | n/a                      |
| 40 |                         |                      | of evidence for each outcome assessed                           |                          |
| 41 |                         |                      |                                                                 |                          |
| 42 |                         |                      |                                                                 |                          |
| 43 | <b>Discussion</b>       |                      |                                                                 |                          |
| 44 |                         |                      |                                                                 |                          |
| 45 | Results in context      | <a href="#">#23a</a> | Provide a general interpretation of the results in the context  | 11                       |
| 46 |                         |                      | of other evidence                                               |                          |
| 47 |                         |                      |                                                                 |                          |
| 48 |                         |                      |                                                                 |                          |
| 49 | Limitations of          | <a href="#">#23b</a> | Discuss any limitations of the evidence included in the         | 14                       |
| 50 | included studies        |                      | review                                                          |                          |
| 51 |                         |                      |                                                                 |                          |
| 52 |                         |                      |                                                                 |                          |
| 53 | Limitations of the      | <a href="#">#23c</a> | Discuss any limitations of the review processes used            | 14                       |
| 54 | review methods          |                      |                                                                 |                          |
| 55 |                         |                      |                                                                 |                          |
| 56 |                         |                      |                                                                 |                          |
| 57 | Implications            | <a href="#">#23d</a> | Discuss implications of the results for practice, policy, and   | 14                       |
| 58 |                         |                      | future research                                                 |                          |
| 59 |                         |                      |                                                                 |                          |
| 60 |                         |                      |                                                                 |                          |

1 **Other information**

2

3 Registration and [#24a](#) Provide registration information for the review, including 7

4 protocol register name and registration number, or state that the

5 review was not registered

6

7

8 Registration and [#24b](#) Indicate where the review protocol can be accessed, or state 7

9 protocol that a protocol was not prepared

10

11

12 Registration and [#24c](#) Describe and explain any amendments to information 7

13 protocol provided at registration or in the protocol

14

15

16 Support [#25](#) Describe sources of financial or non-financial support for 15

17 the review, and the role of the funders or sponsors in the

18 review

19

20

21 Competing interests [#26](#) Declare any competing interests of review authors 15

22

23

24 Availability of data, [#27](#) Report which of the following are publicly available and supplementary

25 code, and other where they can be found: template data collection forms; table 2

26 materials data extracted from included studies; data used for all

27 analyses; analytic code; any other materials used in the

28 review

29

30

31

32 Notes:

- 33
- 34
- 35 • 17: supplementary table 2
  - 36
  - 37 • 27: supplementary table 2 The PRISMA checklist is distributed under the terms of the Creative Commons
  - 38 Attribution License CC-BY. This checklist was completed on 12. July 2022 using
  - 39 <https://www.goodreports.org/>, a tool made by the [EQUATOR Network](#) in collaboration with [Penelope.ai](#)
  - 40
  - 41
  - 42
  - 43
  - 44
  - 45
  - 46
  - 47
  - 48
  - 49
  - 50
  - 51
  - 52
  - 53
  - 54
  - 55
  - 56
  - 57
  - 58
  - 59
  - 60
