# Supplementary material for: Quality of reporting of randomised controlled trials of artificial intelligence in healthcare: a systematic review
Source: HighWire-hosted journal article supplement (doi:10.1136/bmjopen-2022-061519), 2022-09-01
Supplement: bmjopen-2022-061519supp001_data_supplement.pdf [file bmjopen-2022-061519supp001_data_supplement.pdf]

**Search Strategy:****FOR EMBASE:**

- 1) \*deep learning/
- 2) \*artificial intelligence/
- 3) \*machine learning/
- 4) 1 or 2 or 3

**For PubMed:**

1. Artificial intelligence
2. Machine learning
3. Deep learning
4. 1 OR 2 OR 3

**Restricted to:**

- Article type: Randomized Control Trial
- Publication Date: 1/01/2015 to 31/12/2021
- Species: Human
- Language: English
