# Supplementary material for: Quality of reporting of randomised controlled trials of artificial intelligence in healthcare: a systematic review
Source: PubMed Central journal article supplement — BMJ Open. 2022 Sep 5;12(9):e061519. doi: 10.1136/bmjopen-2022-061519 (PMC9445816; doi:10.1136/bmjopen-2022-061519), 2022-09-05
Supplement: bmjopen-2022-061519supp002.pdf [file bmjopen-2022-061519supp002.pdf]

Supplementary table 1: CONSORT-AI checklist\*\*

| Section                   | Item | CONSORT 2010 item                                                                                                       | CONSORT-AI item               |                                                                                                                                                       | Addressed on page no.* |
|---------------------------|------|-------------------------------------------------------------------------------------------------------------------------|-------------------------------|-------------------------------------------------------------------------------------------------------------------------------------------------------|------------------------|
| <b>Title and abstract</b> |      |                                                                                                                         |                               |                                                                                                                                                       |                        |
| Title and abstract        | 1a   | Identification as a randomized trial in the title                                                                       | CONSORT-AI a,b<br>Elaboration | (i) Indicate that the intervention involves artificial intelligence/machine learning in the title and/or abstract and specify the type of model.      |                        |
|                           | 1b   | Structured summary of trial design, methods, results, and conclusions (for specific guidance see CONSORT for abstracts) |                               | (ii) State the intended use of the AI intervention within the trial in the title and/or abstract.                                                     |                        |
| <b>Introduction</b>       |      |                                                                                                                         |                               |                                                                                                                                                       |                        |
| Background and objectives | 2a   | Scientific background and explanation of rationale                                                                      | CONSORT-AI a (i)<br>Extension | Explain the intended use of the AI intervention in the context of the clinical pathway, including its purpose and its intended users (e.g. healthcare |                        |

|                |    |                                                                                                    |                              |                                                                                                                       |  |
|----------------|----|----------------------------------------------------------------------------------------------------|------------------------------|-----------------------------------------------------------------------------------------------------------------------|--|
|                |    |                                                                                                    |                              | professionals, patients, public).                                                                                     |  |
|                | 2b | Specific objectives or hypotheses                                                                  |                              |                                                                                                                       |  |
| <b>Methods</b> |    |                                                                                                    |                              |                                                                                                                       |  |
| Trial design   | 3a | Description of trial design (such as parallel, factorial) including allocation ratio               |                              |                                                                                                                       |  |
|                | 3b | Important changes to methods after trial commencement (such as eligibility criteria), with reasons |                              |                                                                                                                       |  |
| Participants   | 4a | Eligibility criteria for participants                                                              | CONSORT-AI a (i) Elaboration | State the inclusion and exclusion criteria at the level of participants.                                              |  |
|                |    |                                                                                                    | CONSORT-AI a (ii) Extension  | State the inclusion and exclusion criteria at the level of the input data.                                            |  |
|                | 4b | Settings and locations where the data were collected                                               | CONSORT-AI b Extension       | Describe how the AI intervention was integrated into the trial setting, including any onsite or on site requirements. |  |

|               |    |                                                                                                                                       |                            |                                                                                                                                      |  |
|---------------|----|---------------------------------------------------------------------------------------------------------------------------------------|----------------------------|--------------------------------------------------------------------------------------------------------------------------------------|--|
| Interventions | 5  | The interventions for each group with sufficient details to allow replication, including how and when they were actually administered | CONSORT-AI (i) Extension   | State which version of the AI algorithm was used.                                                                                    |  |
|               |    |                                                                                                                                       | CONSORT-AI (ii) Extension  | Describe how the input data were acquired and selected for the AI intervention.                                                      |  |
|               |    |                                                                                                                                       | CONSORT-AI (iii) Extension | Describe how poor quality or unavailable input data were assessed and handled.                                                       |  |
|               |    |                                                                                                                                       | CONSORT-AI (iv) Extension. | Specify whether there was human-AI interaction in the handling of the input data, and what level of expertise was required of users. |  |
|               |    |                                                                                                                                       | CONSORT-AI (v) Extension   | Specify the output of the AI intervention                                                                                            |  |
|               |    |                                                                                                                                       | CONSORT-AI (vi) Extension  | Explain how the AI intervention's outputs contributed to decision-making or other elements of clinical practice.                     |  |
| Outcomes      | 6a | Completely defined pre-specified primary and secondary outcome                                                                        |                            |                                                                                                                                      |  |

|                                  |    |                                                                                                                                                  |  |  |  |
|----------------------------------|----|--------------------------------------------------------------------------------------------------------------------------------------------------|--|--|--|
|                                  |    | measures, including how and when they were assessed                                                                                              |  |  |  |
|                                  | 6b | Any changes to trial outcomes after the trial commenced, with reasons                                                                            |  |  |  |
| Sample size                      | 7a | How sample size was determined                                                                                                                   |  |  |  |
|                                  | 7b | When applicable, explanation of any interim analyses and stopping guidelines                                                                     |  |  |  |
| Sequence generation              | 8a | Method used to generate the random allocation sequence                                                                                           |  |  |  |
|                                  | 8b | Type of randomization; details of any restriction (such as blocking and block size)                                                              |  |  |  |
| <b>Randomization</b>             |    |                                                                                                                                                  |  |  |  |
| Allocation concealment mechanism | 9  | Mechanism used to implement the random allocation sequence (such as sequentially numbered containers), describing any steps taken to conceal the |  |  |  |

|                     |     |                                                                                                                                          |  |  |  |
|---------------------|-----|------------------------------------------------------------------------------------------------------------------------------------------|--|--|--|
|                     |     | sequence until interventions were assigned                                                                                               |  |  |  |
| Implementation      | 10  | Who generated the random allocation sequence, who enrolled participants, and who assigned participants to interventions                  |  |  |  |
| Blinding            | 11a | If done, who was blinded after assignment to interventions (for example, participants, care providers, those assessing outcomes) and how |  |  |  |
|                     | 11b | If relevant, description of the similarity of interventions                                                                              |  |  |  |
| Statistical methods | 12a | Statistical methods used to compare groups for primary and secondary outcomes                                                            |  |  |  |
|                     | 12b | Methods for additional analyses, such as subgroup analyses and adjusted analyses                                                         |  |  |  |
| <b>Results</b>      |     |                                                                                                                                          |  |  |  |

|                                                         |     |                                                                                                                                                |  |  |  |
|---------------------------------------------------------|-----|------------------------------------------------------------------------------------------------------------------------------------------------|--|--|--|
| Participant flow<br>(a diagram is strongly recommended) | 13a | For each group, the numbers of participants who were randomly assigned, received intended treatment, and were analyzed for the primary outcome |  |  |  |
|                                                         | 13b | For each group, losses and exclusions after randomization, together with reasons                                                               |  |  |  |
| Recruitment                                             | 14a | Dates defining the periods of recruitment and follow-up                                                                                        |  |  |  |
|                                                         | 14b | Why the trial ended or was stopped                                                                                                             |  |  |  |
| Baseline data                                           | 15  | A table showing baseline demographic and clinical characteristics for each group                                                               |  |  |  |
| Numbers analyzed                                        | 16  | For each group, number of participants (denominator) included in each analysis and whether the analysis was by original assigned groups        |  |  |  |
| Outcomes and estimation                                 | 17a | For each primary and secondary outcome,                                                                                                        |  |  |  |

|                    |     |                                                                                                                                           |                      |                                                                                                                                                                    |  |
|--------------------|-----|-------------------------------------------------------------------------------------------------------------------------------------------|----------------------|--------------------------------------------------------------------------------------------------------------------------------------------------------------------|--|
|                    |     | results for each group, and the estimated effect size and its precision (such as % confidence interval)                                   |                      |                                                                                                                                                                    |  |
|                    | 17b | For binary outcomes, presentation of both absolute and relative effect sizes is recommended                                               |                      |                                                                                                                                                                    |  |
| Ancillary analyses | 18  | Results of any other analyses performed, including subgroup analyses and adjusted analyses, distinguishing pre-specified from exploratory |                      |                                                                                                                                                                    |  |
| Harms              | 19  | All important harms or unintended effects in each group (for specific guidance see CONSORT for harms)                                     | CONSORT-AI Extension | Describe results of any analysis of performance errors and how errors were identified, where applicable. If no such analysis was planned or done, justify why not. |  |
| <b>Discussion</b>  |     |                                                                                                                                           |                      |                                                                                                                                                                    |  |
| Limitations        | 20  | Trial limitations, addressing sources of potential bias,                                                                                  |                      |                                                                                                                                                                    |  |

|                          |    |                                                                                                               |                       |                                                                                                                            |  |
|--------------------------|----|---------------------------------------------------------------------------------------------------------------|-----------------------|----------------------------------------------------------------------------------------------------------------------------|--|
|                          |    | imprecision, and, if relevant, multiplicity of analyses                                                       |                       |                                                                                                                            |  |
| Generalizability         | 21 | Generalizability (external validity, applicability) of the trial findings                                     |                       |                                                                                                                            |  |
| Interpretation           | 22 | Interpretation consistent with results, balancing benefits and harms, and considering other relevant evidence |                       |                                                                                                                            |  |
| <b>Other information</b> |    |                                                                                                               |                       |                                                                                                                            |  |
| Registration             | 23 | Registration number and name of trial registry                                                                |                       |                                                                                                                            |  |
| Protocol                 | 24 | Where the full trial protocol can be accessed, if available                                                   |                       |                                                                                                                            |  |
| Funding                  | 25 | Sources of funding and other support (such as supply of drugs), role of funders                               | CONSORT-AI Extension. | State whether and how the AI intervention and/or its code can be accessed, including any restrictions to access or re-use. |  |
|                          |    |                                                                                                               |                       |                                                                                                                            |  |



\*Indicates page numbers to be completed by authors during protocol development

\*\* 22. Liu X, Rivera SC, Moher D, et al. Reporting guidelines for clinical trial reports for interventions involving artificial intelligence: the CONSORT-AI Extension. *BMJ* 2020;370:m3164.
